# Supplementary material for: Investigation of Equine In Vivo and In Vitro Derived Metabolites of the Selective Androgen Receptor Modulator (SARM) ACP-105 for Improved Doping Control
Source: PubMed Central journal article supplement (PMC7912737; doi:10.3390/metabo11020085), 2021-02-01

# S1: Supplementary material

## Structural elucidation and fragmentation of ACP-105 and tentatively identified metabolites

| Metabolite | Metabolic transformation               | Elemental composition<br>[M+H] <sup>+</sup>                                  | Theoretical<br>m/z |
|------------|----------------------------------------|------------------------------------------------------------------------------|--------------------|
| ACP-105    | Administered substance                 | C <sub>16</sub> H <sub>20</sub> ClN <sub>2</sub> O <sup>+</sup>              | 291.1259           |
| M1a-c      | Monohydroxylation                      | C <sub>16</sub> H <sub>20</sub> ClN <sub>2</sub> O <sub>2</sub> <sup>+</sup> | 307.1208           |
| M2a-b      | Dihydroxylation                        | C <sub>16</sub> H <sub>20</sub> ClN <sub>2</sub> O <sub>3</sub> <sup>+</sup> | 323.1157           |
| M3a-b      | Loss of 2H                             | C <sub>16</sub> H <sub>18</sub> ClN <sub>2</sub> O <sup>+</sup>              | 289.1102           |
| M4a-b      | Monohydroxylation +<br>Loss of 2H      | C <sub>16</sub> H <sub>18</sub> ClN <sub>2</sub> O <sub>2</sub> <sup>+</sup> | 305.1051           |
| M5a-b      | Dihydroxylation +<br>Loss of 2H        | C <sub>16</sub> H <sub>18</sub> ClN <sub>2</sub> O <sub>3</sub> <sup>+</sup> | 321.1000           |
| M6a-c      | Trihydroxylation +<br>Loss of 2H       | C <sub>16</sub> H <sub>18</sub> ClN <sub>2</sub> O <sub>4</sub> <sup>+</sup> | 337.0950           |
| M7         | Glucuronidation                        | C <sub>22</sub> H <sub>28</sub> ClN <sub>2</sub> O <sub>7</sub> <sup>+</sup> | 467.1580           |
| M8a-d      | Monohydroxylation +<br>Glucuronidation | C <sub>22</sub> H <sub>28</sub> ClN <sub>2</sub> O <sub>8</sub> <sup>+</sup> | 483.1529           |
| M9a-b      | Dihydroxylation +<br>Glucuronidation   | C <sub>22</sub> H <sub>28</sub> ClN <sub>2</sub> O <sub>9</sub> <sup>+</sup> | 499.1478           |

# ACP-105

Administrated substance  
Retention time: 11.59 min  
m/z: 291.1262

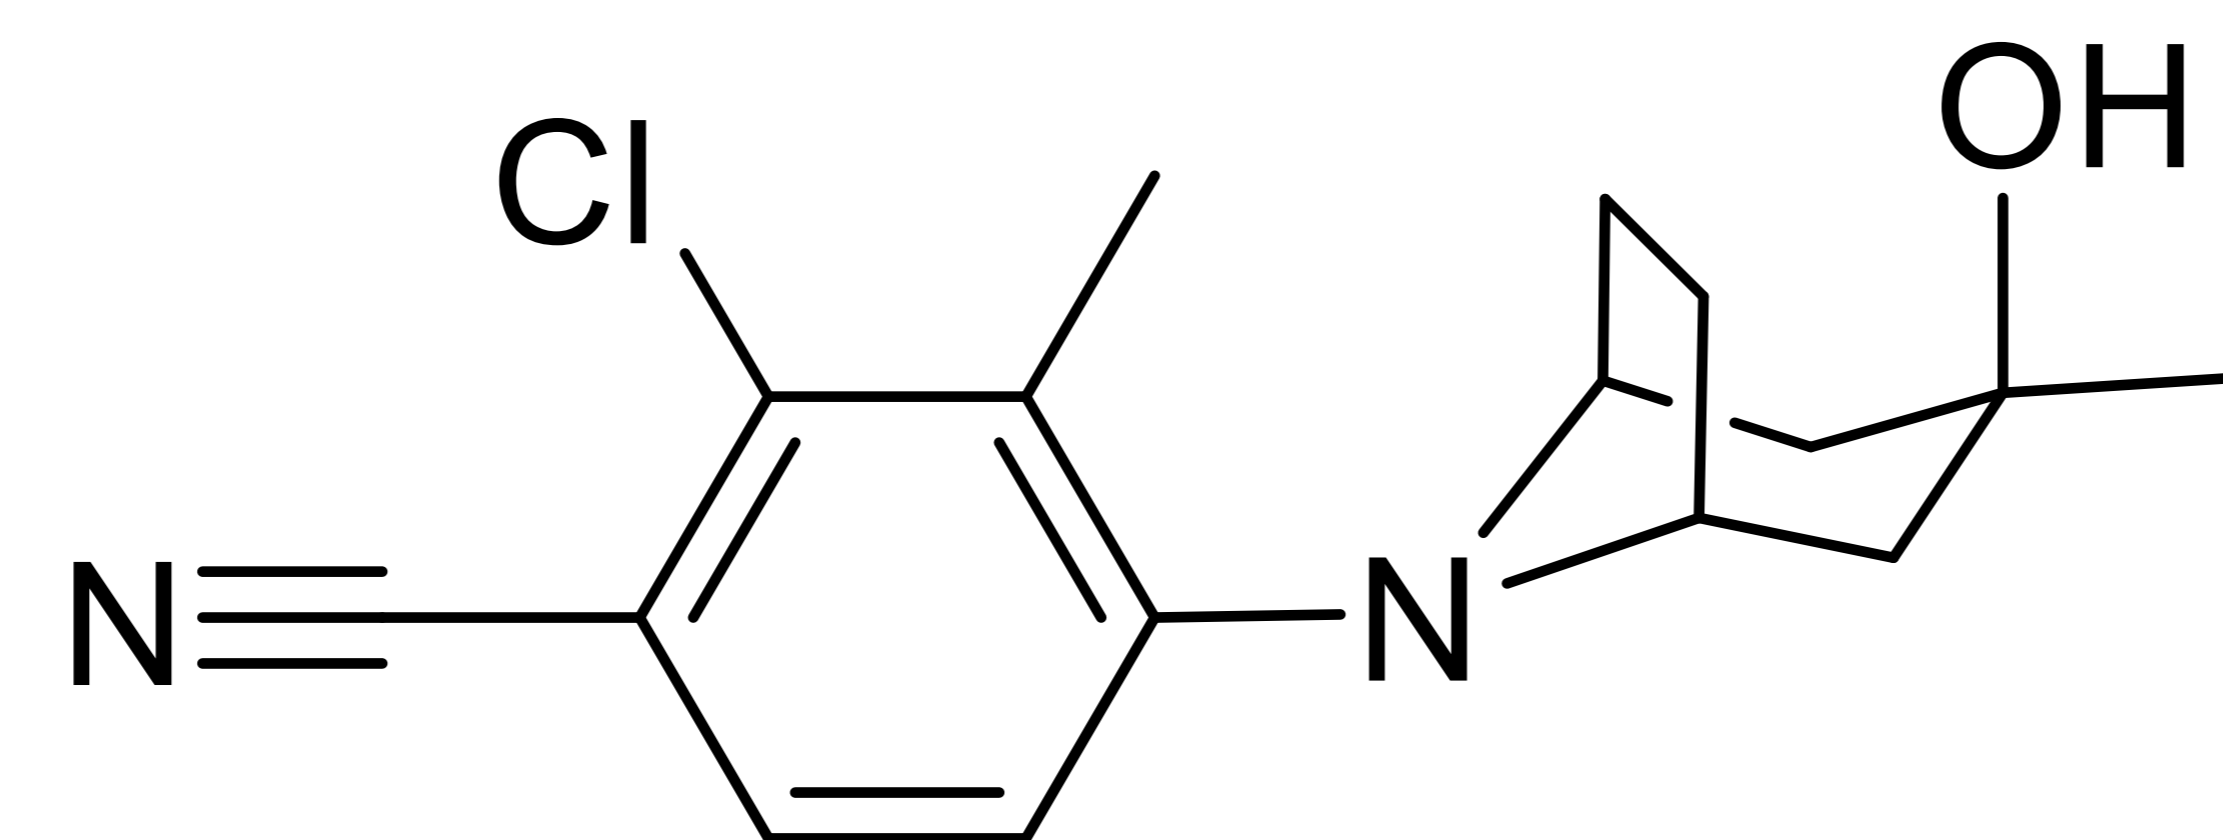

MNB\_20200429\_03 #4841 RT: 11.62 AV: 1 NL: 2.65E+006  
T: FTMS + p ESI d Full ms2 291.1261 @hcd35.00 [50.0000-315.0000]

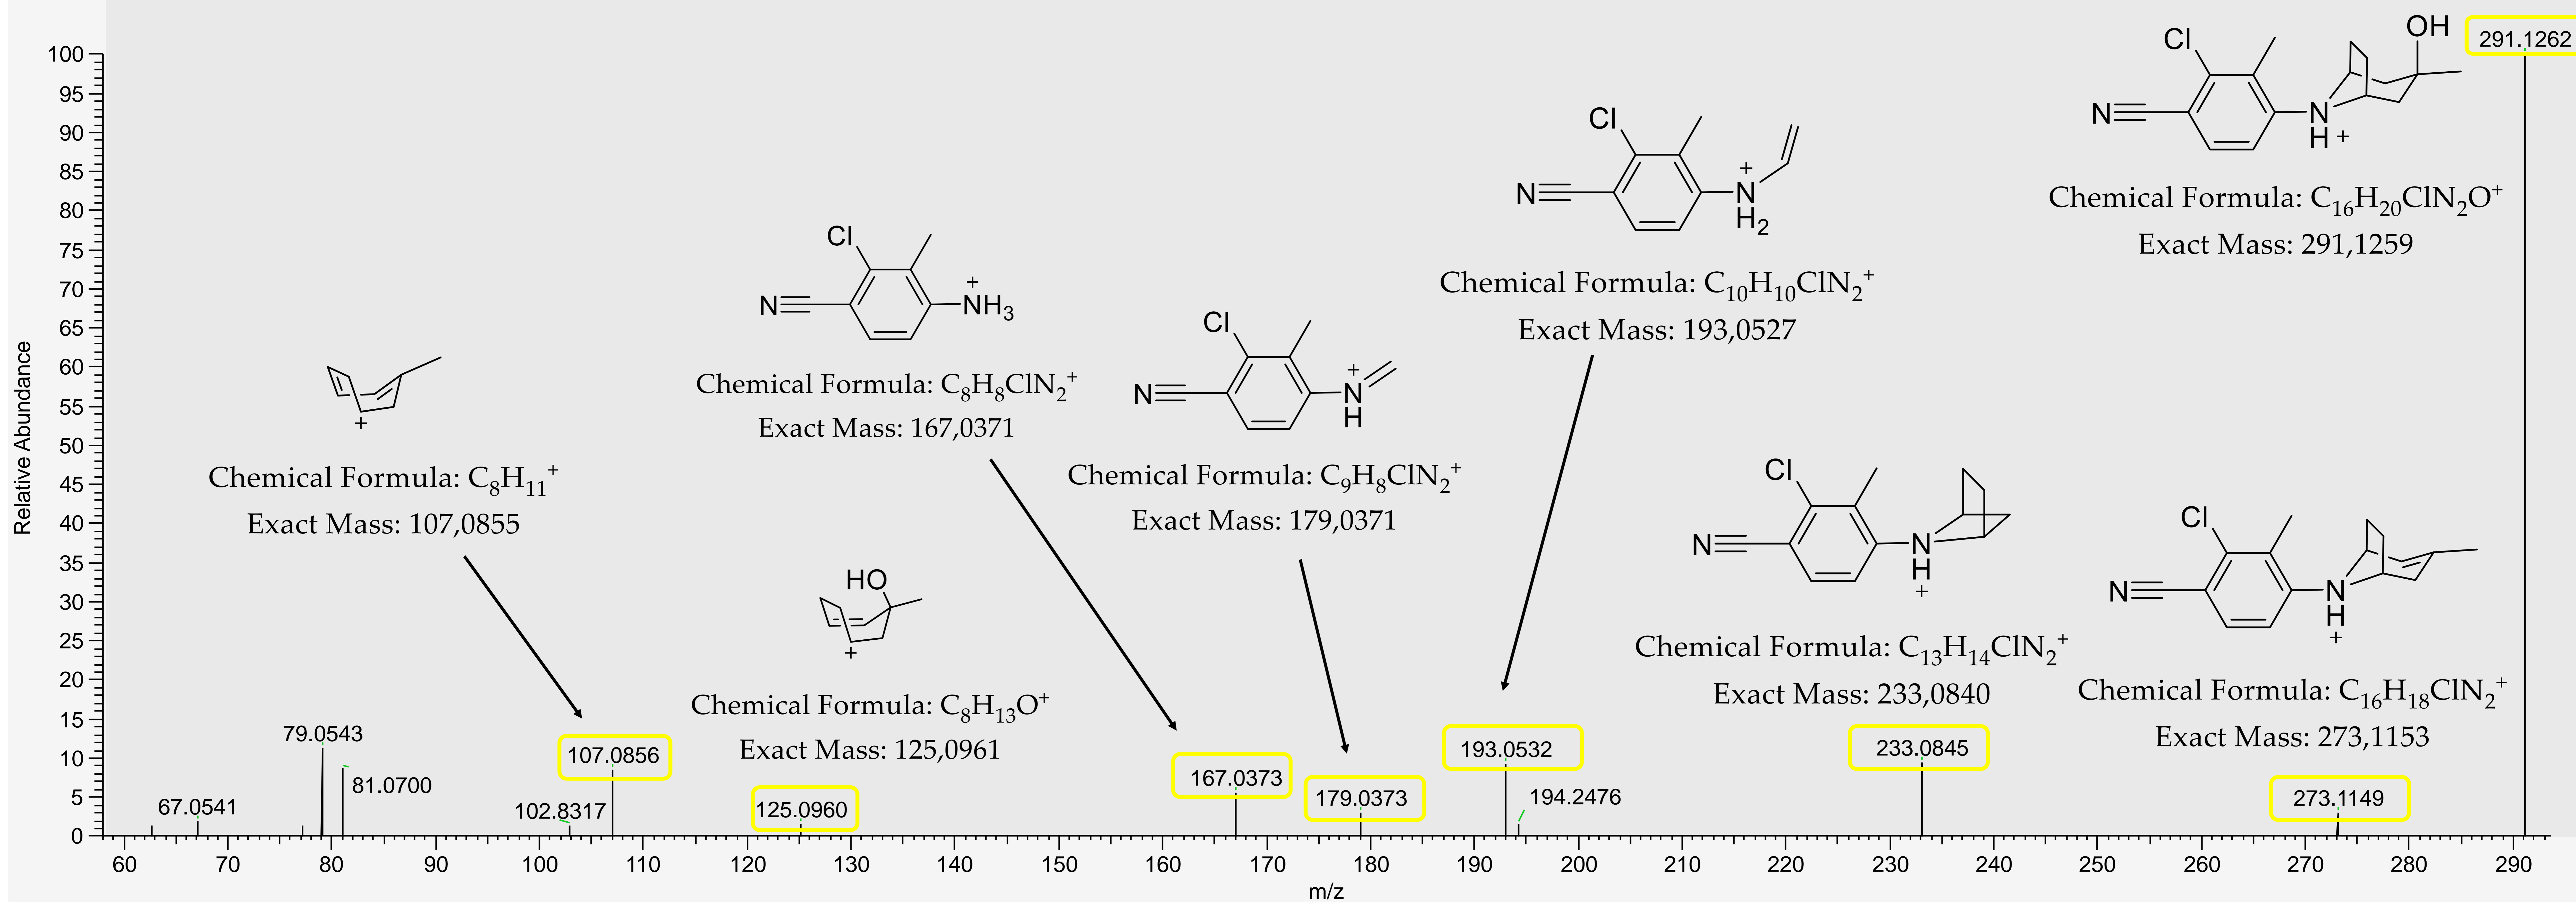



# M1a

## Monohydroxylation

Retention time: 8.65 min

m/z: 307.1209

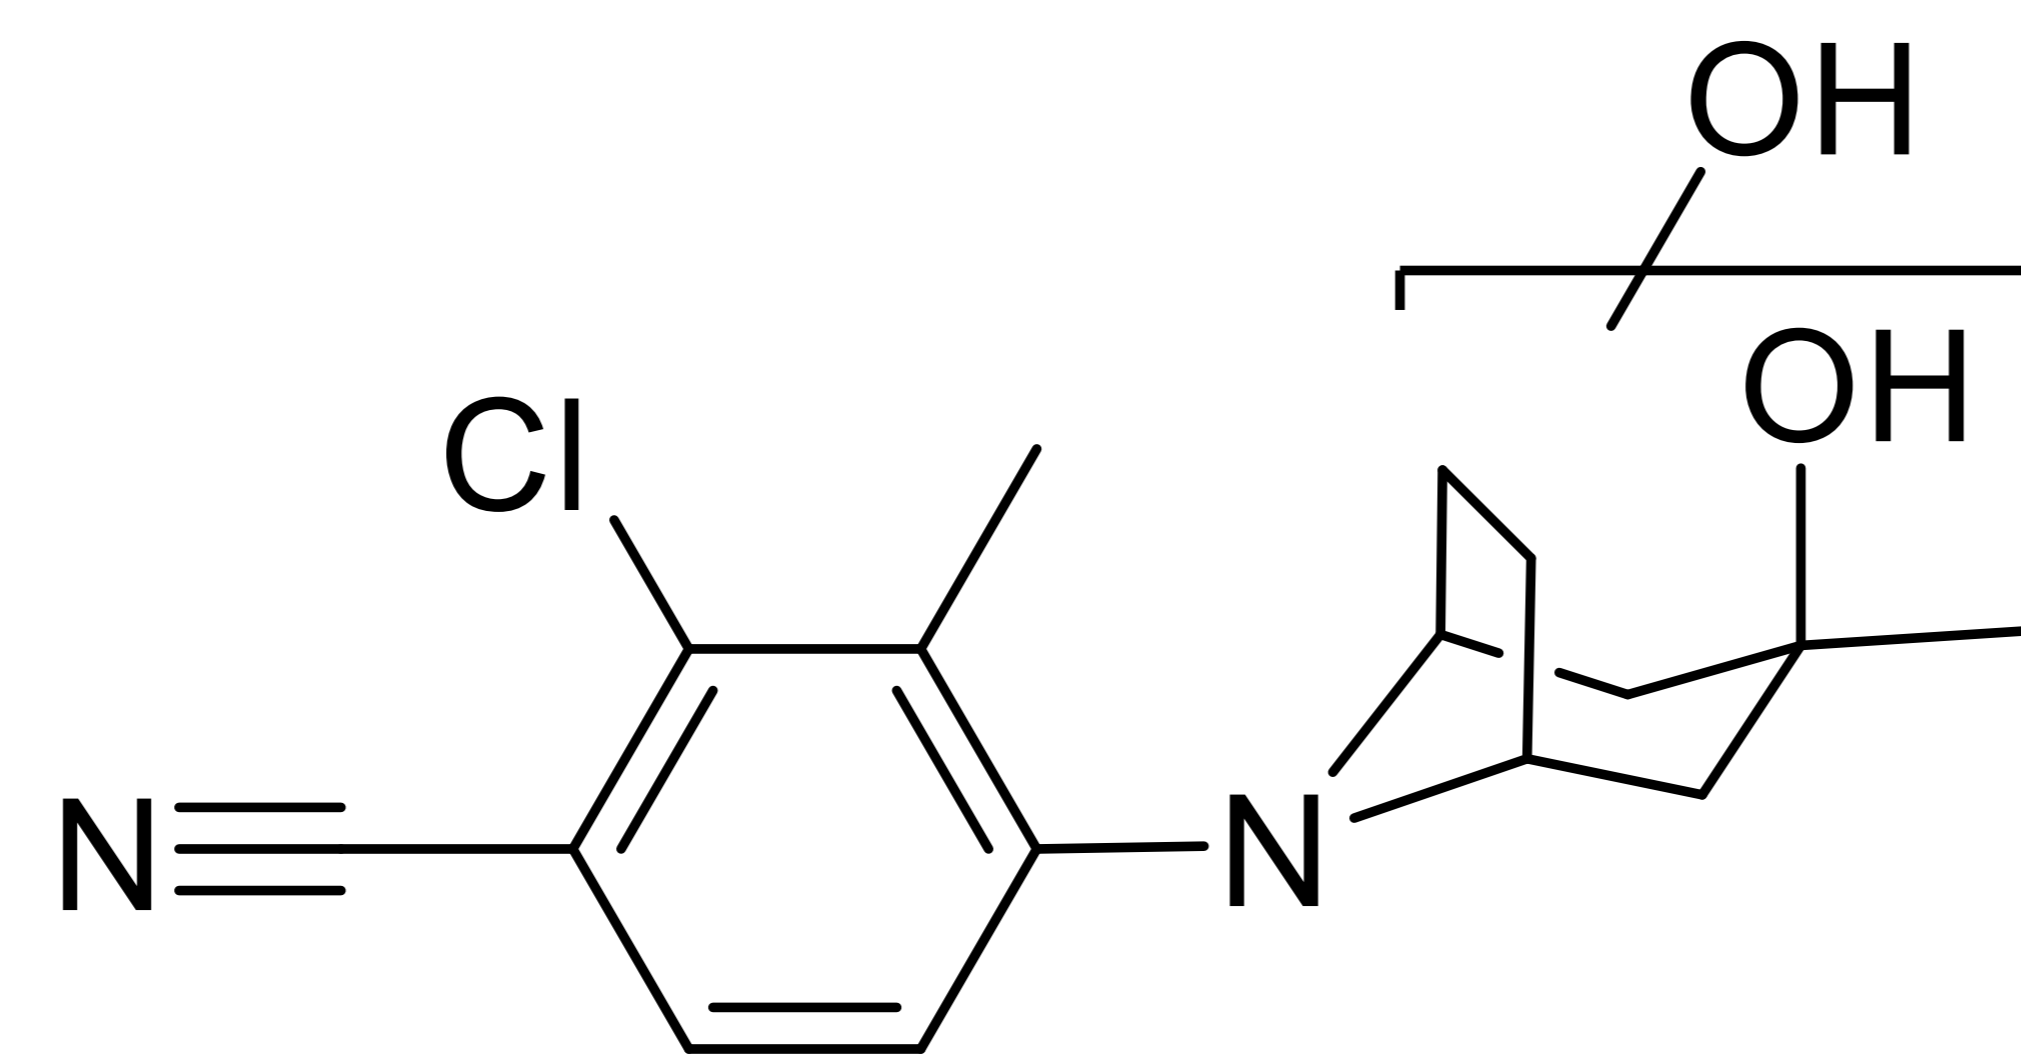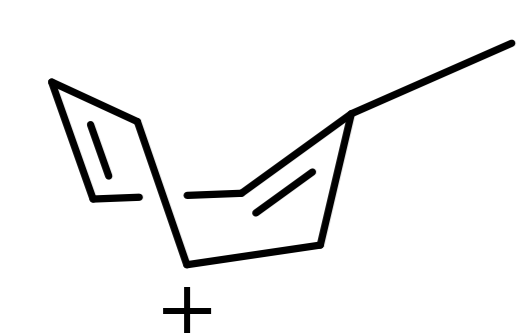

Chemical Formula:  $C_8H_{11}^+$   
Exact Mass: 107,0855

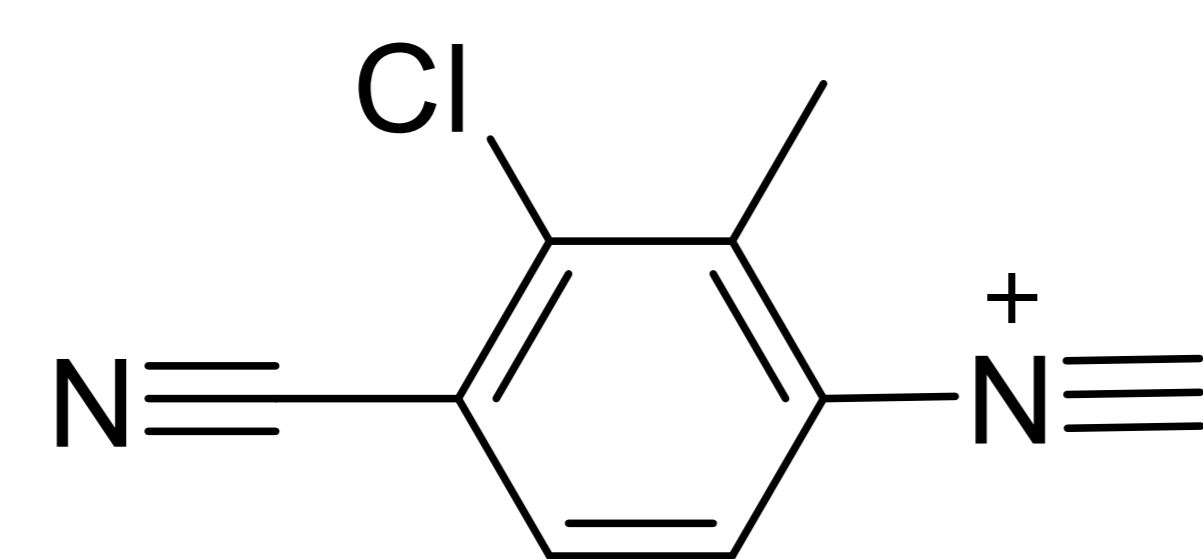

Chemical Formula:  $C_9H_6ClN_2^+$   
Exact Mass: 177,0214

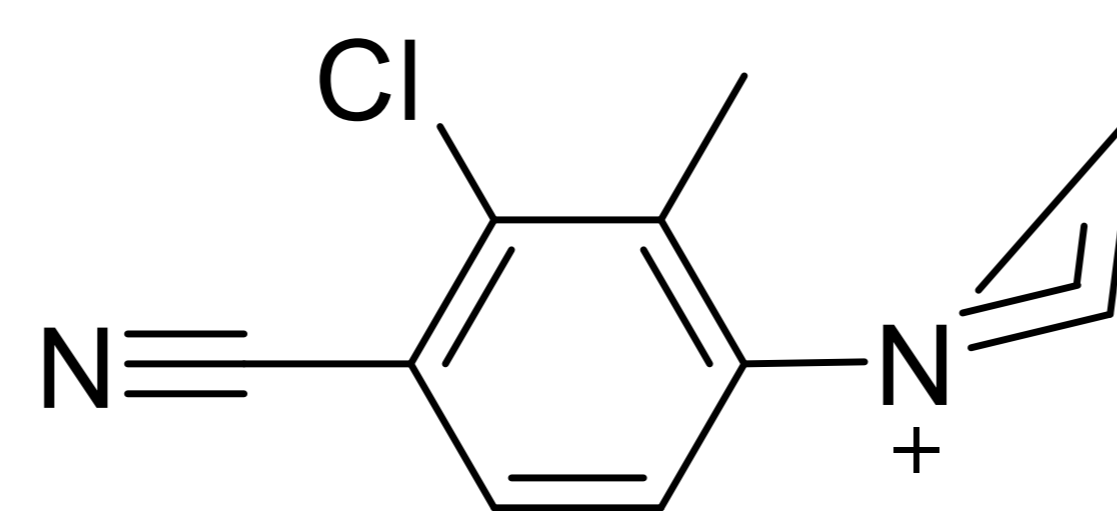

Chemical Formula:  $C_{10}H_6ClN_2^+$   
Exact Mass: 189,0214

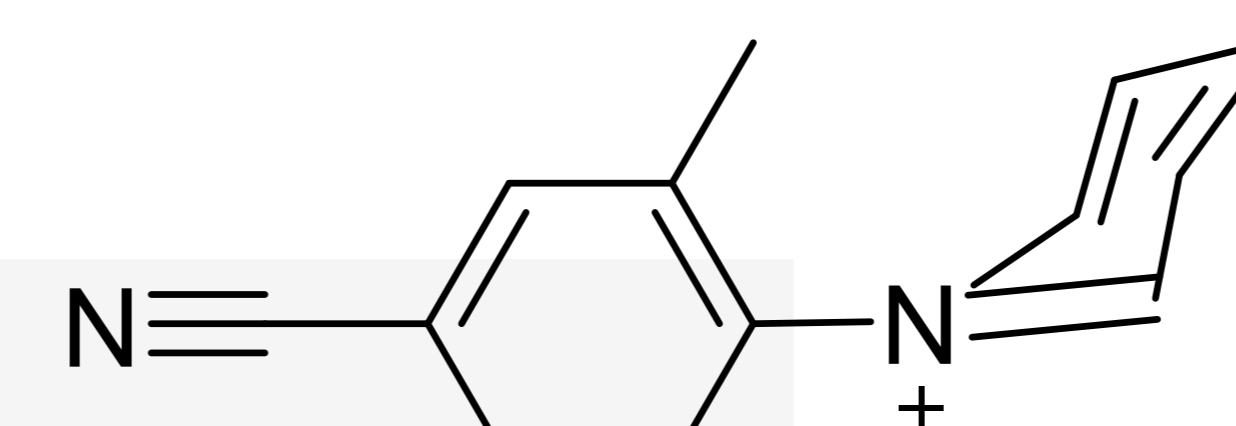

Chemical Formula:  $C_{13}H_{11}N_2^+$   
Exact Mass: 195,0917

MNE\_20200730\_014 #1810-1826 RT: 8.62-8.69 AV: 17 SB: 15 8.59-8.62, 8.69-8.72 NL: 5.20E+005  
T: FTMS + p ESI Full ms2 307.1208@hcd38.33 [50.0000-330.0000]

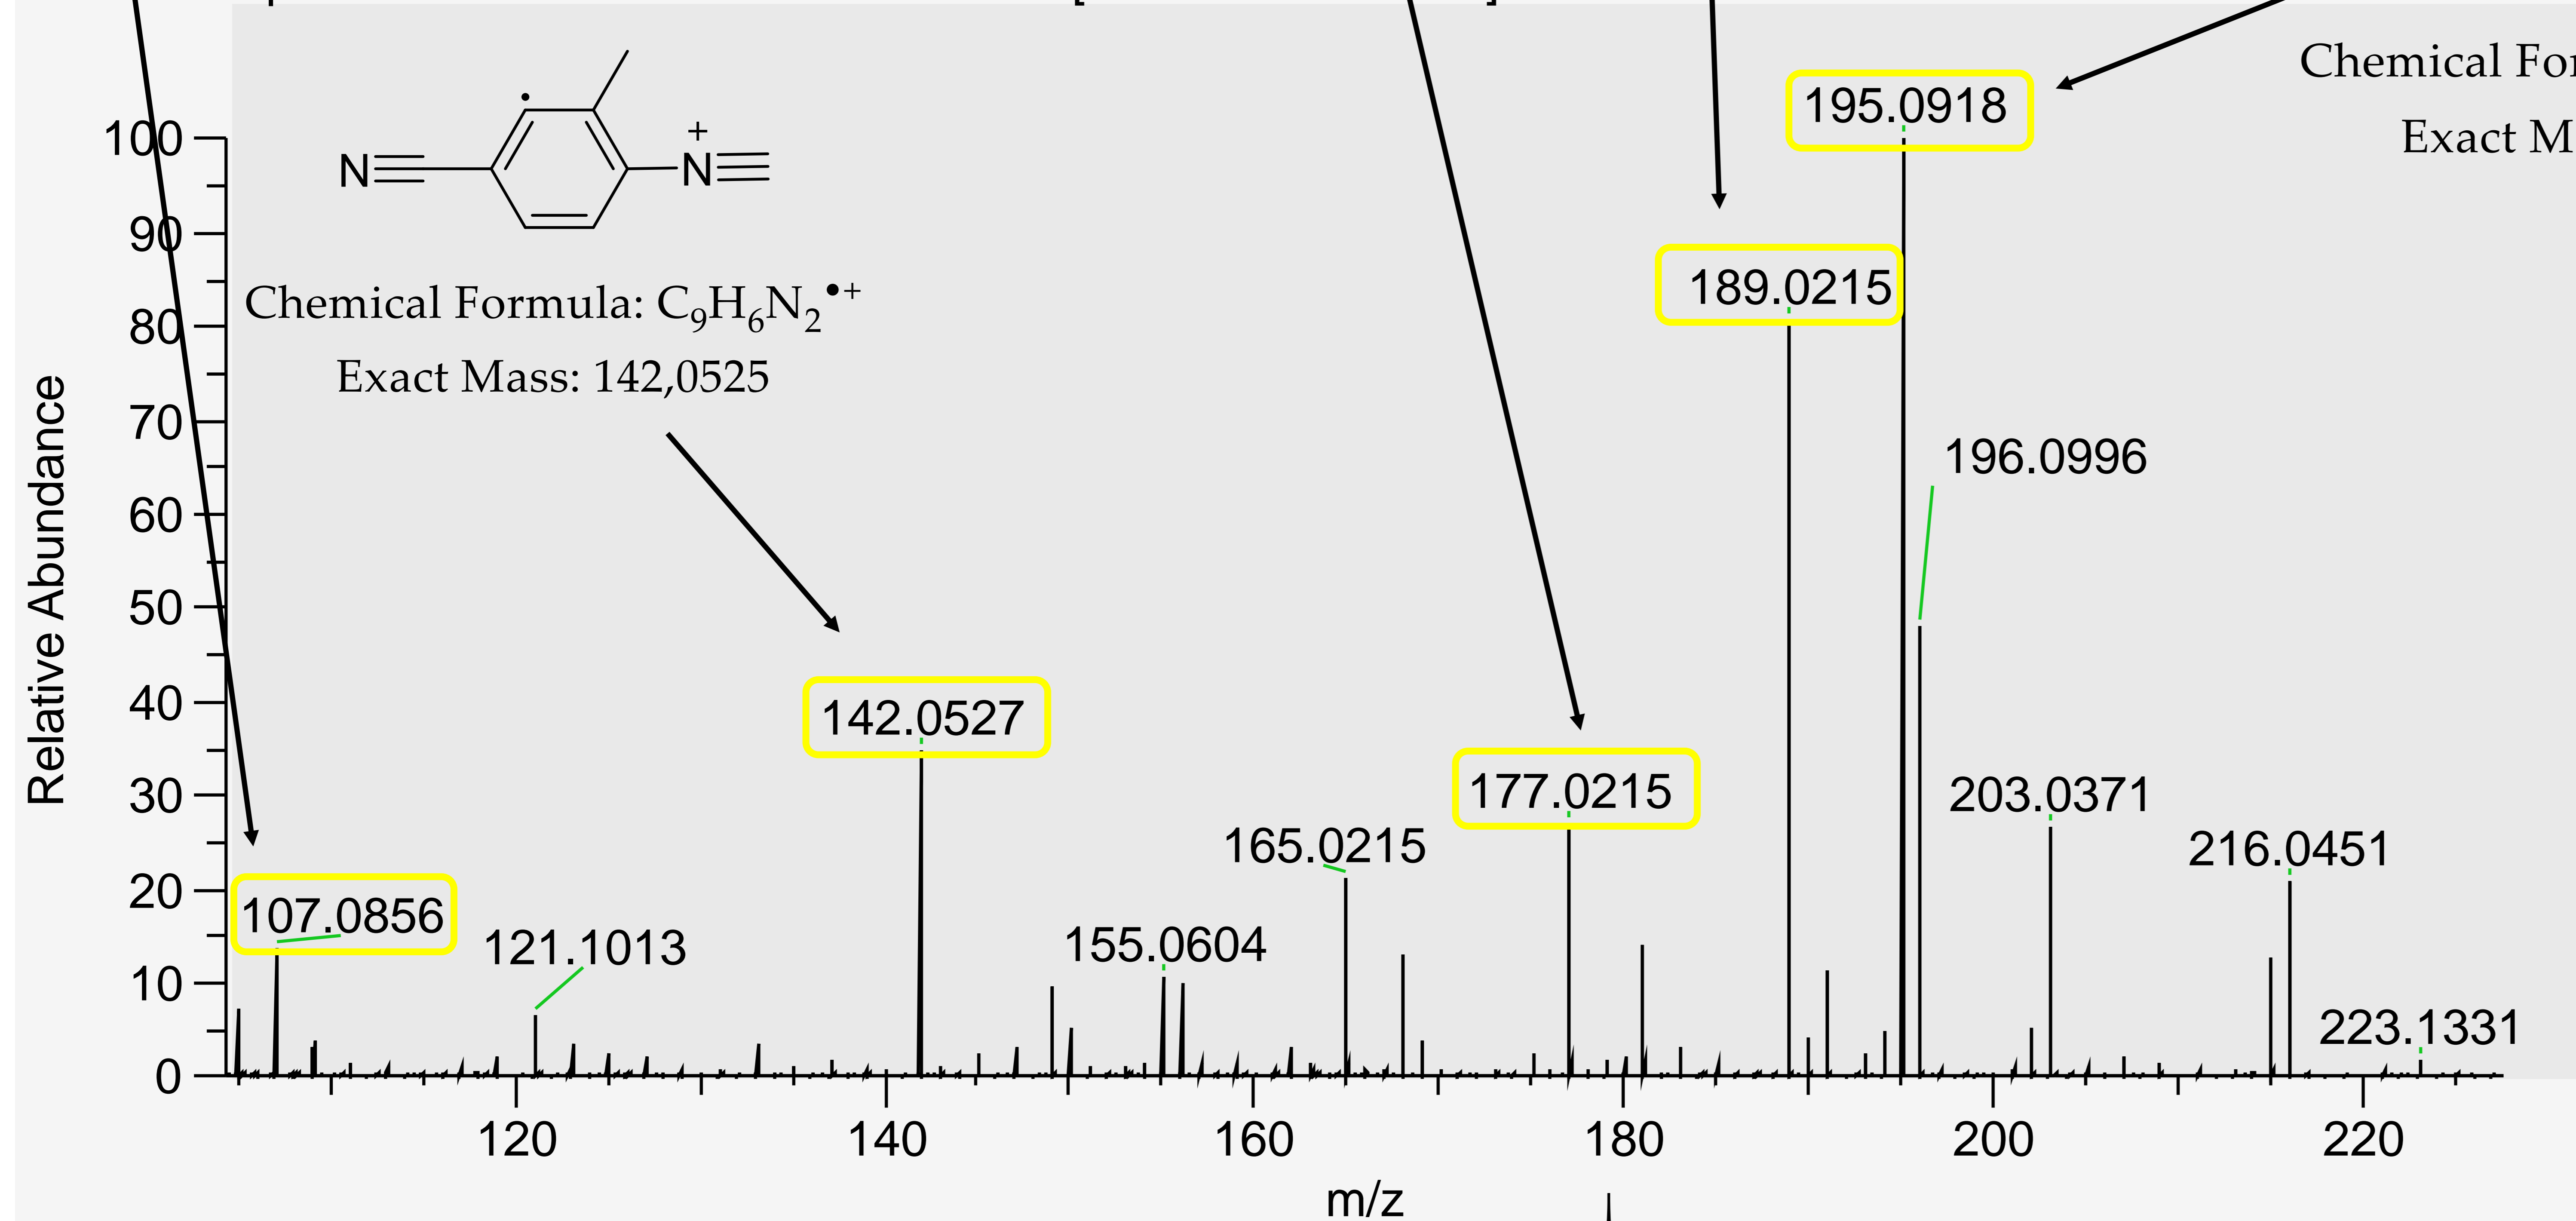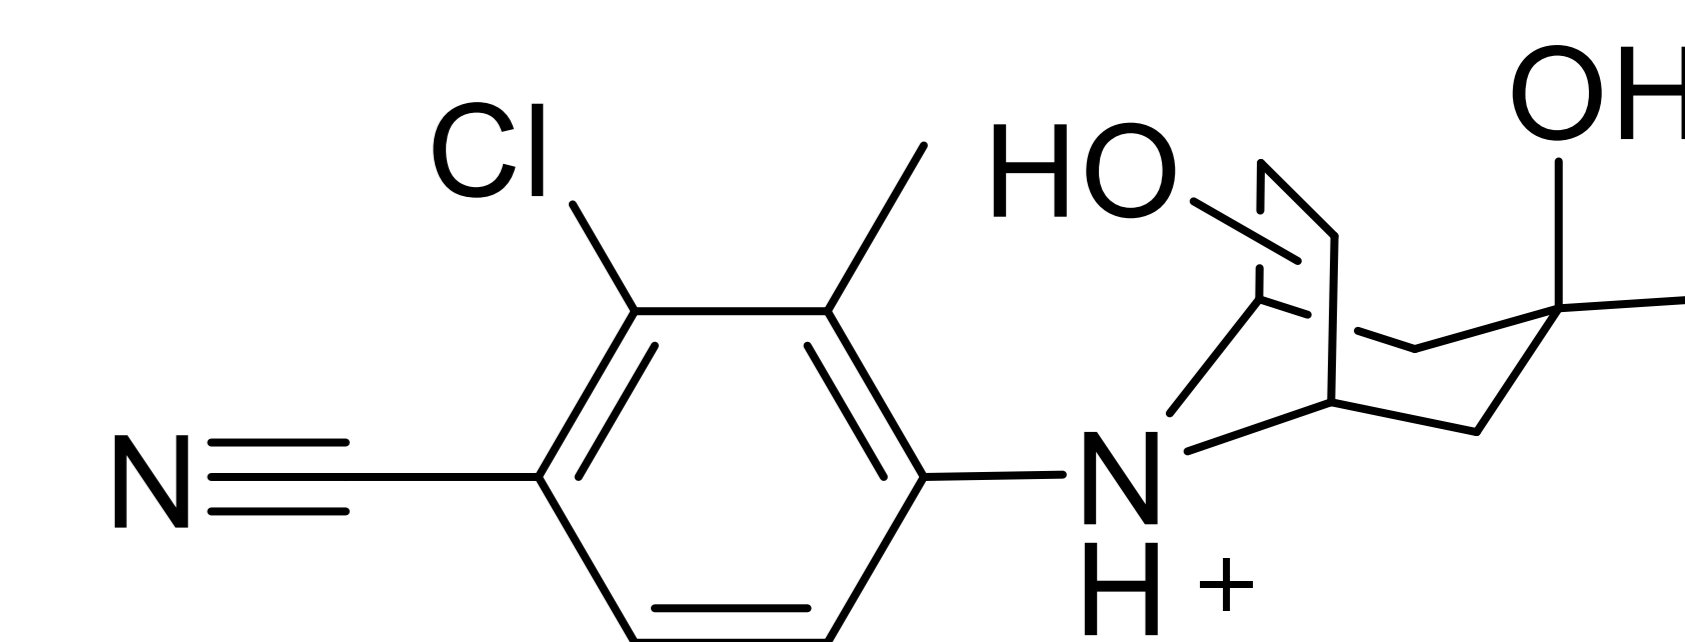

Chemical Formula:  $C_{16}H_{20}ClN_2O_2^+$   
Exact Mass: 307,1208

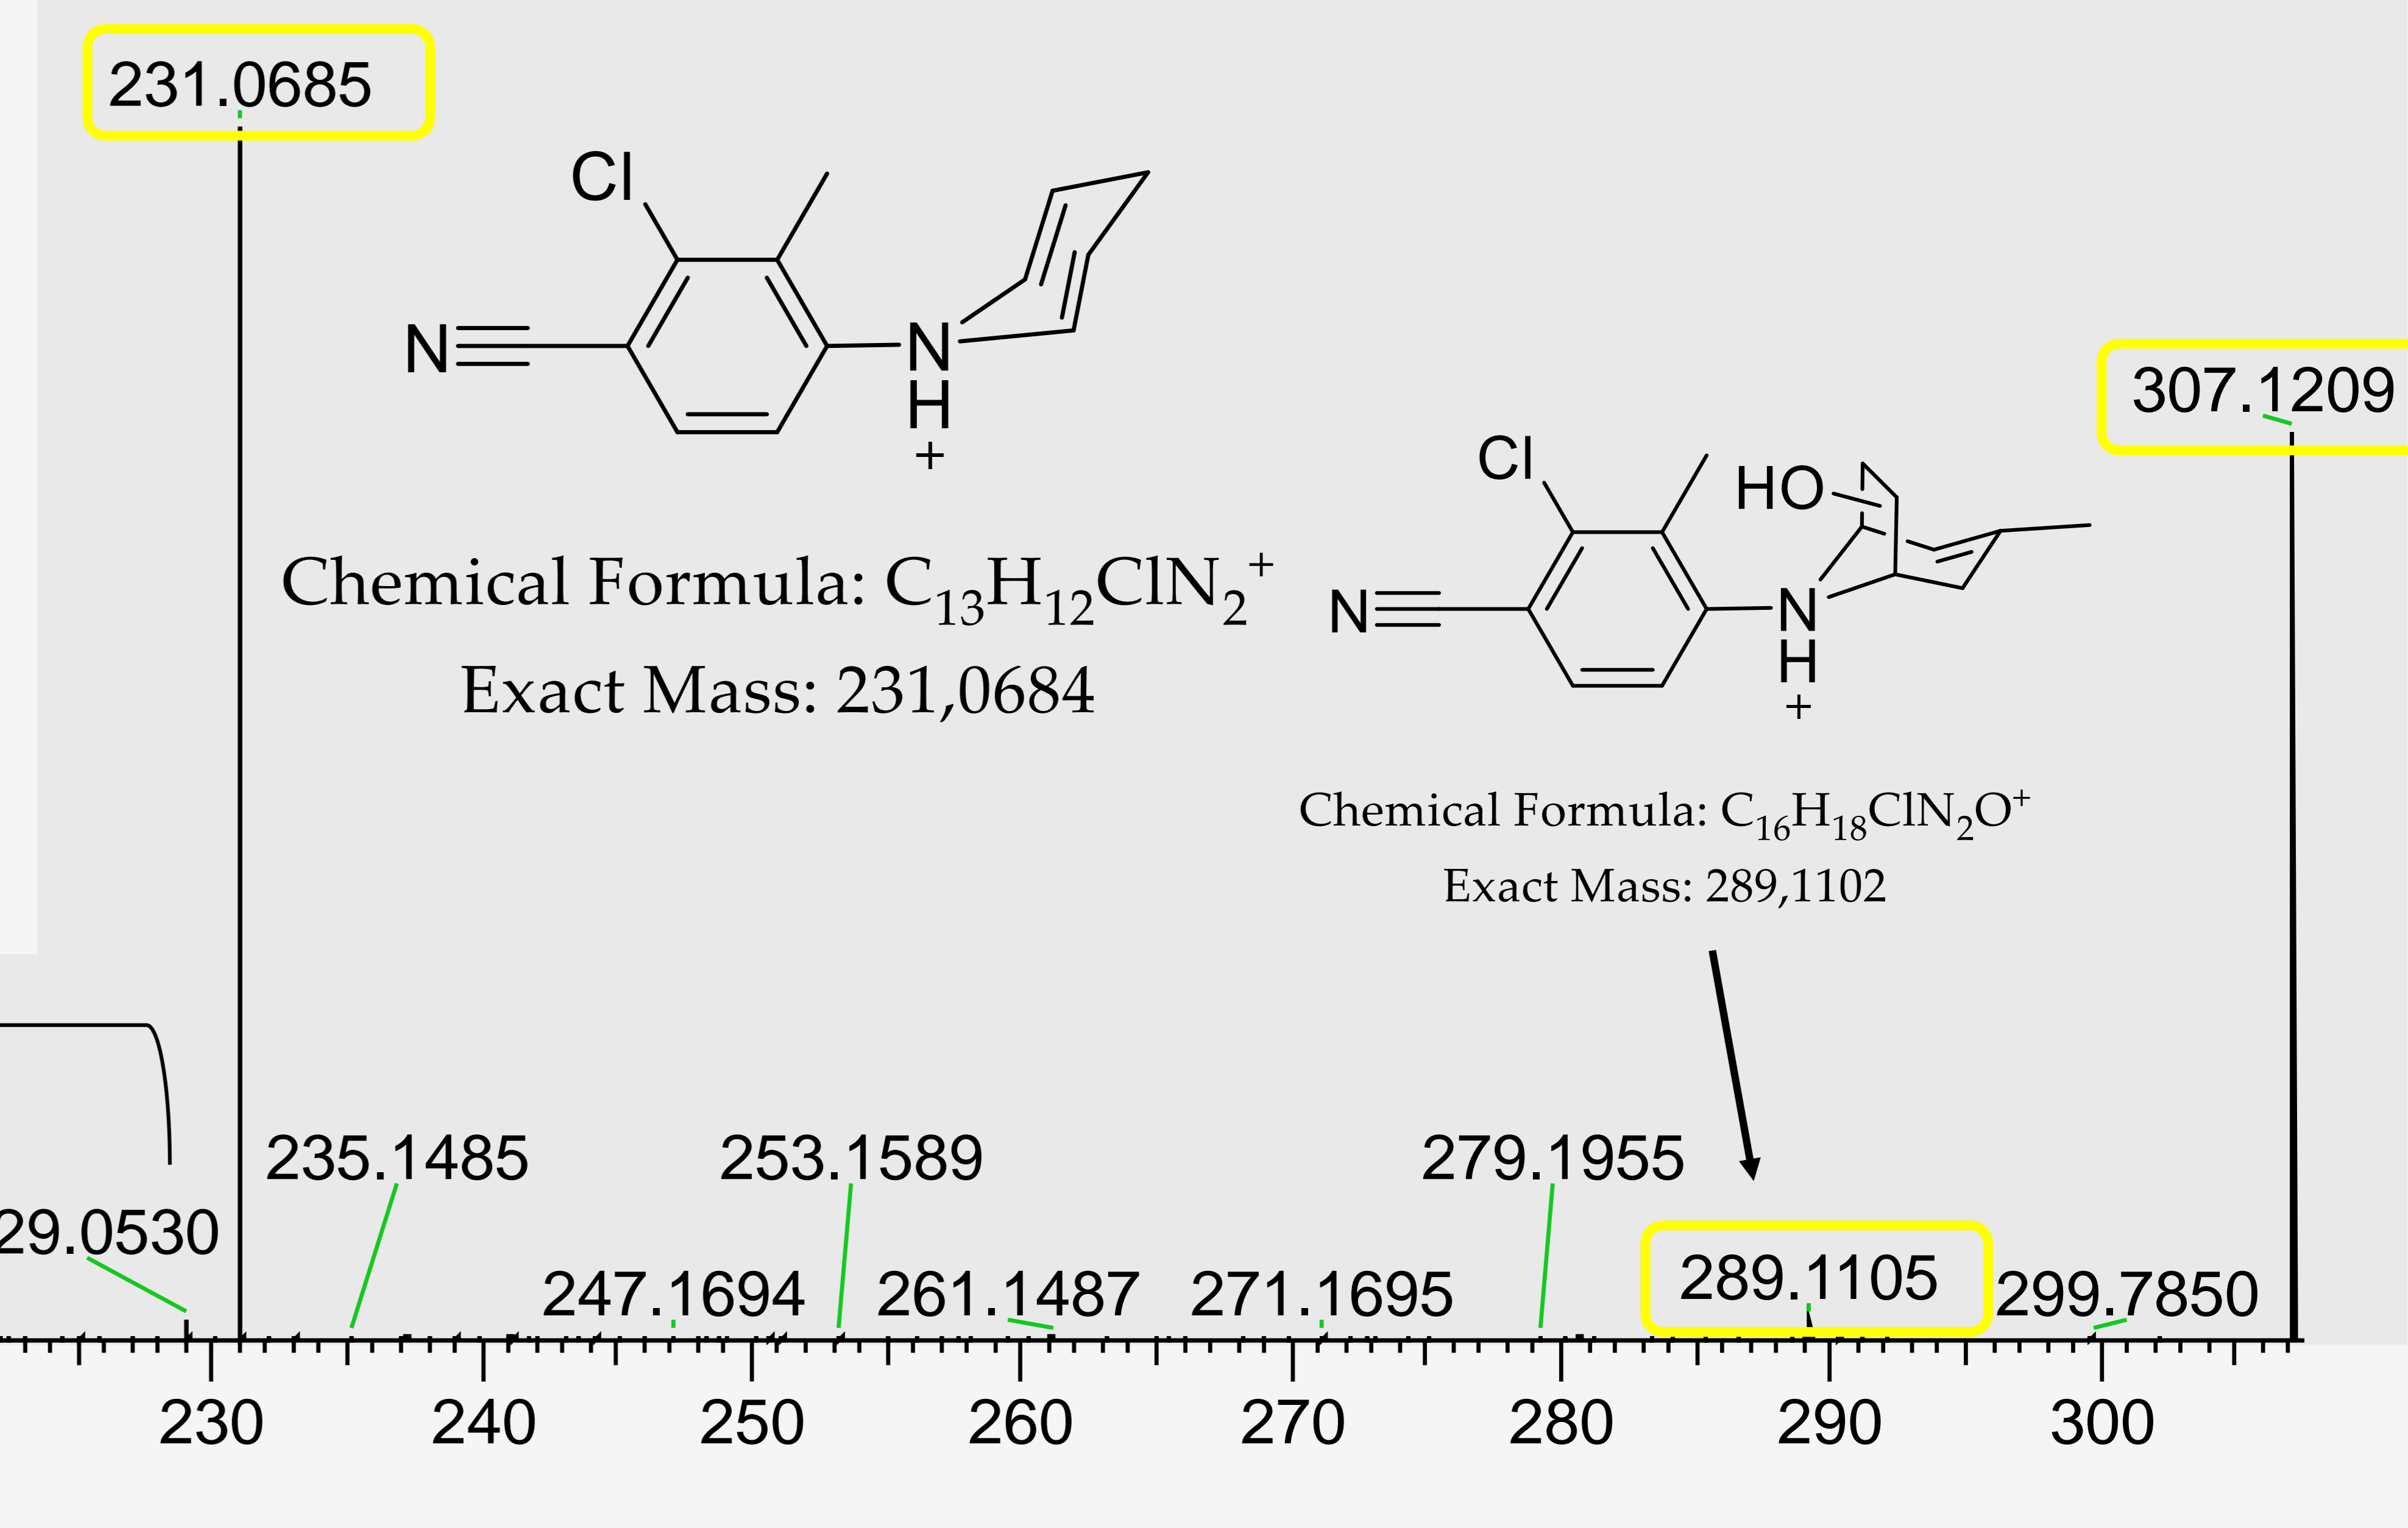



# M1b

Monohydroxylation

Retention time: 9.00 min

m/z: 307.1210

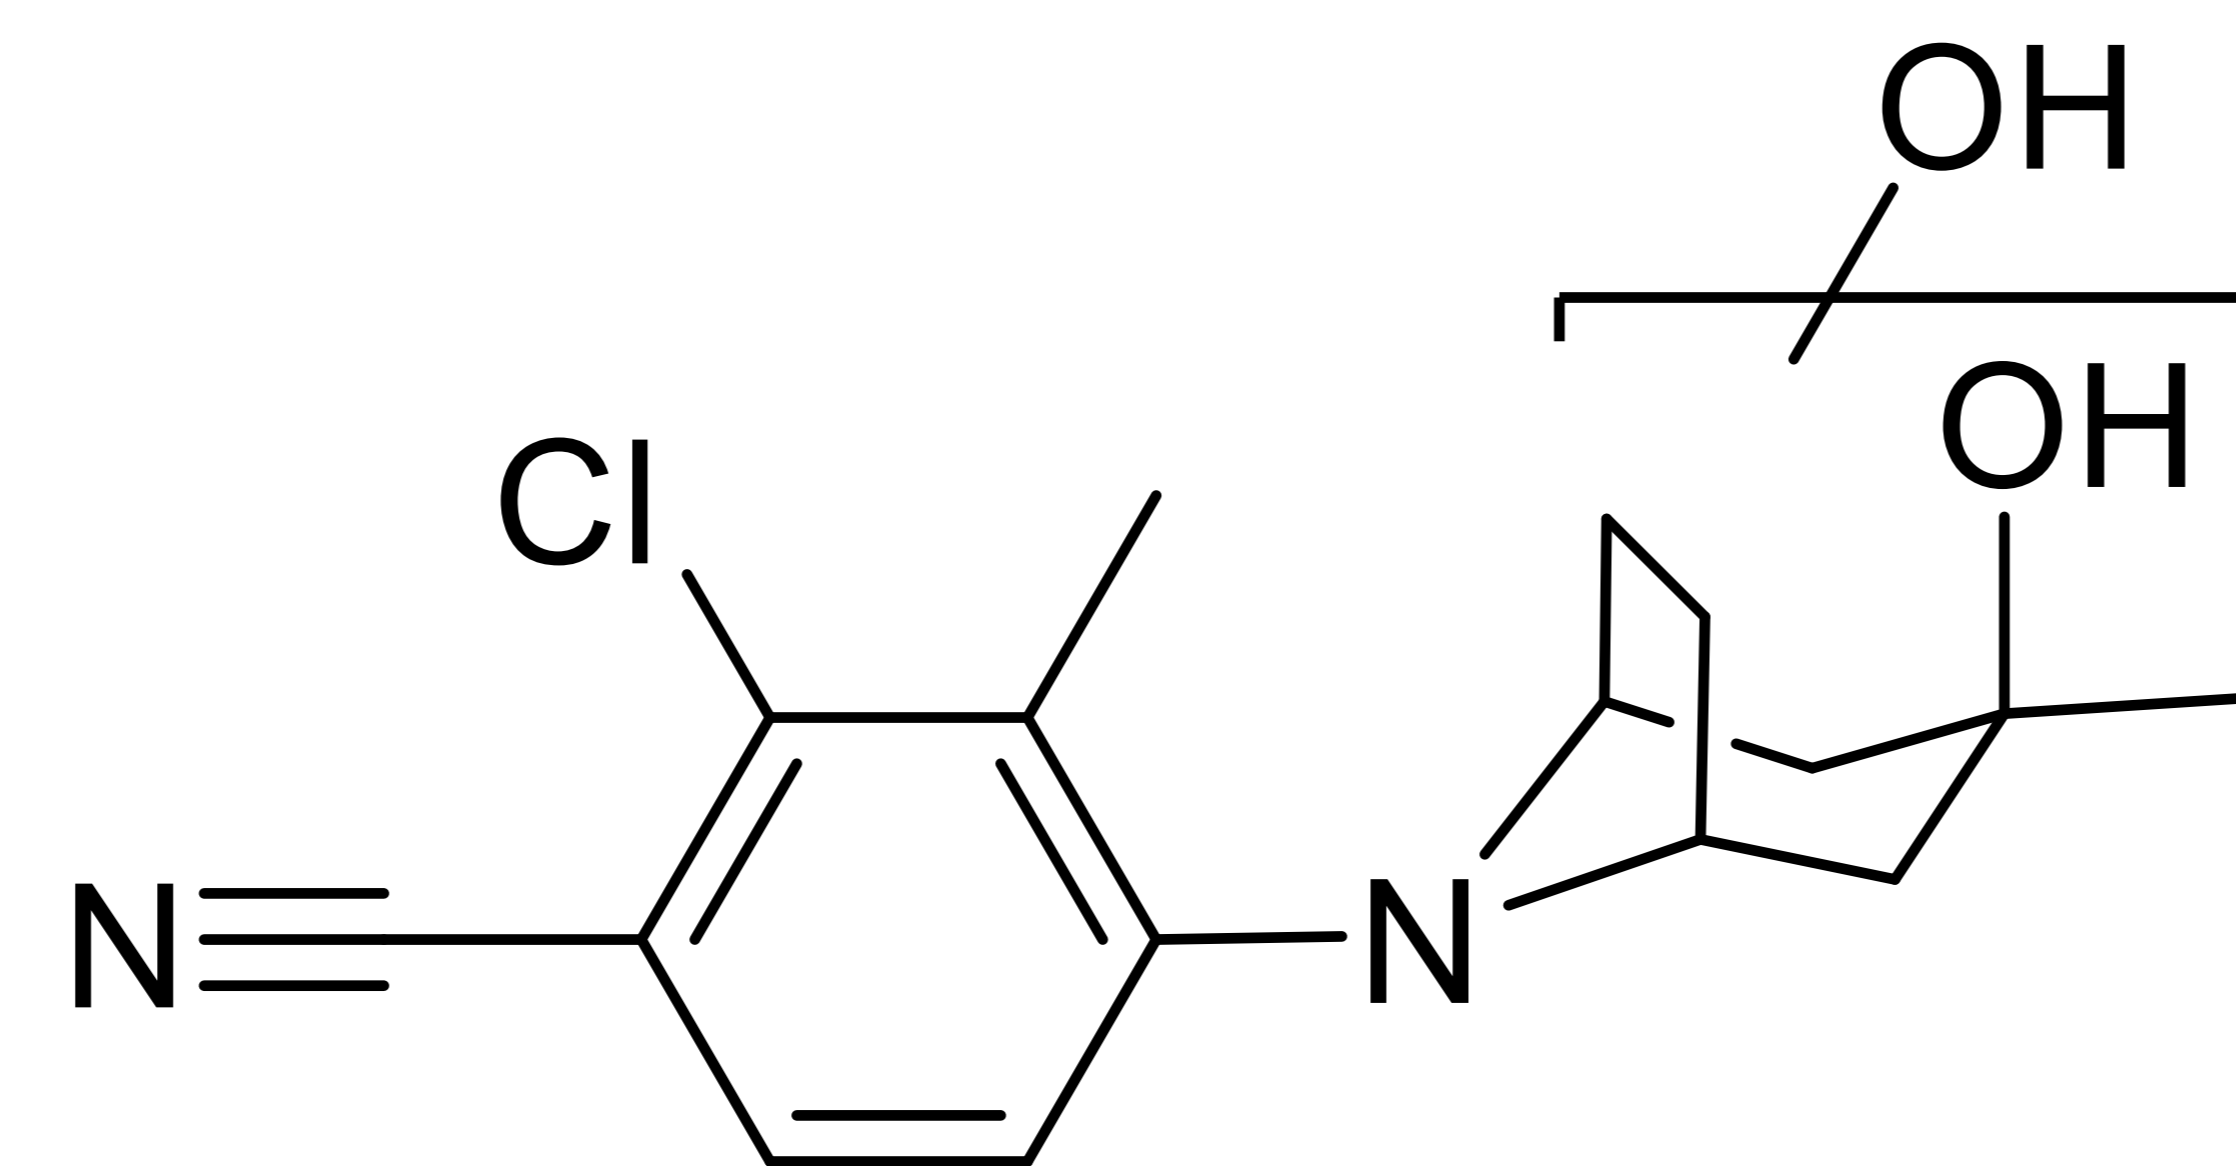

MNB\_20200730\_014 #1894-1908 RT: 9-9.06 AV: 15 SB: 26 8.93-9.00 , 9.06-9.10 NL: 3.51E+005  
T: FTMS + p ESI Full ms2 307.1208@hcd38.33 [50.0000-330.0000]

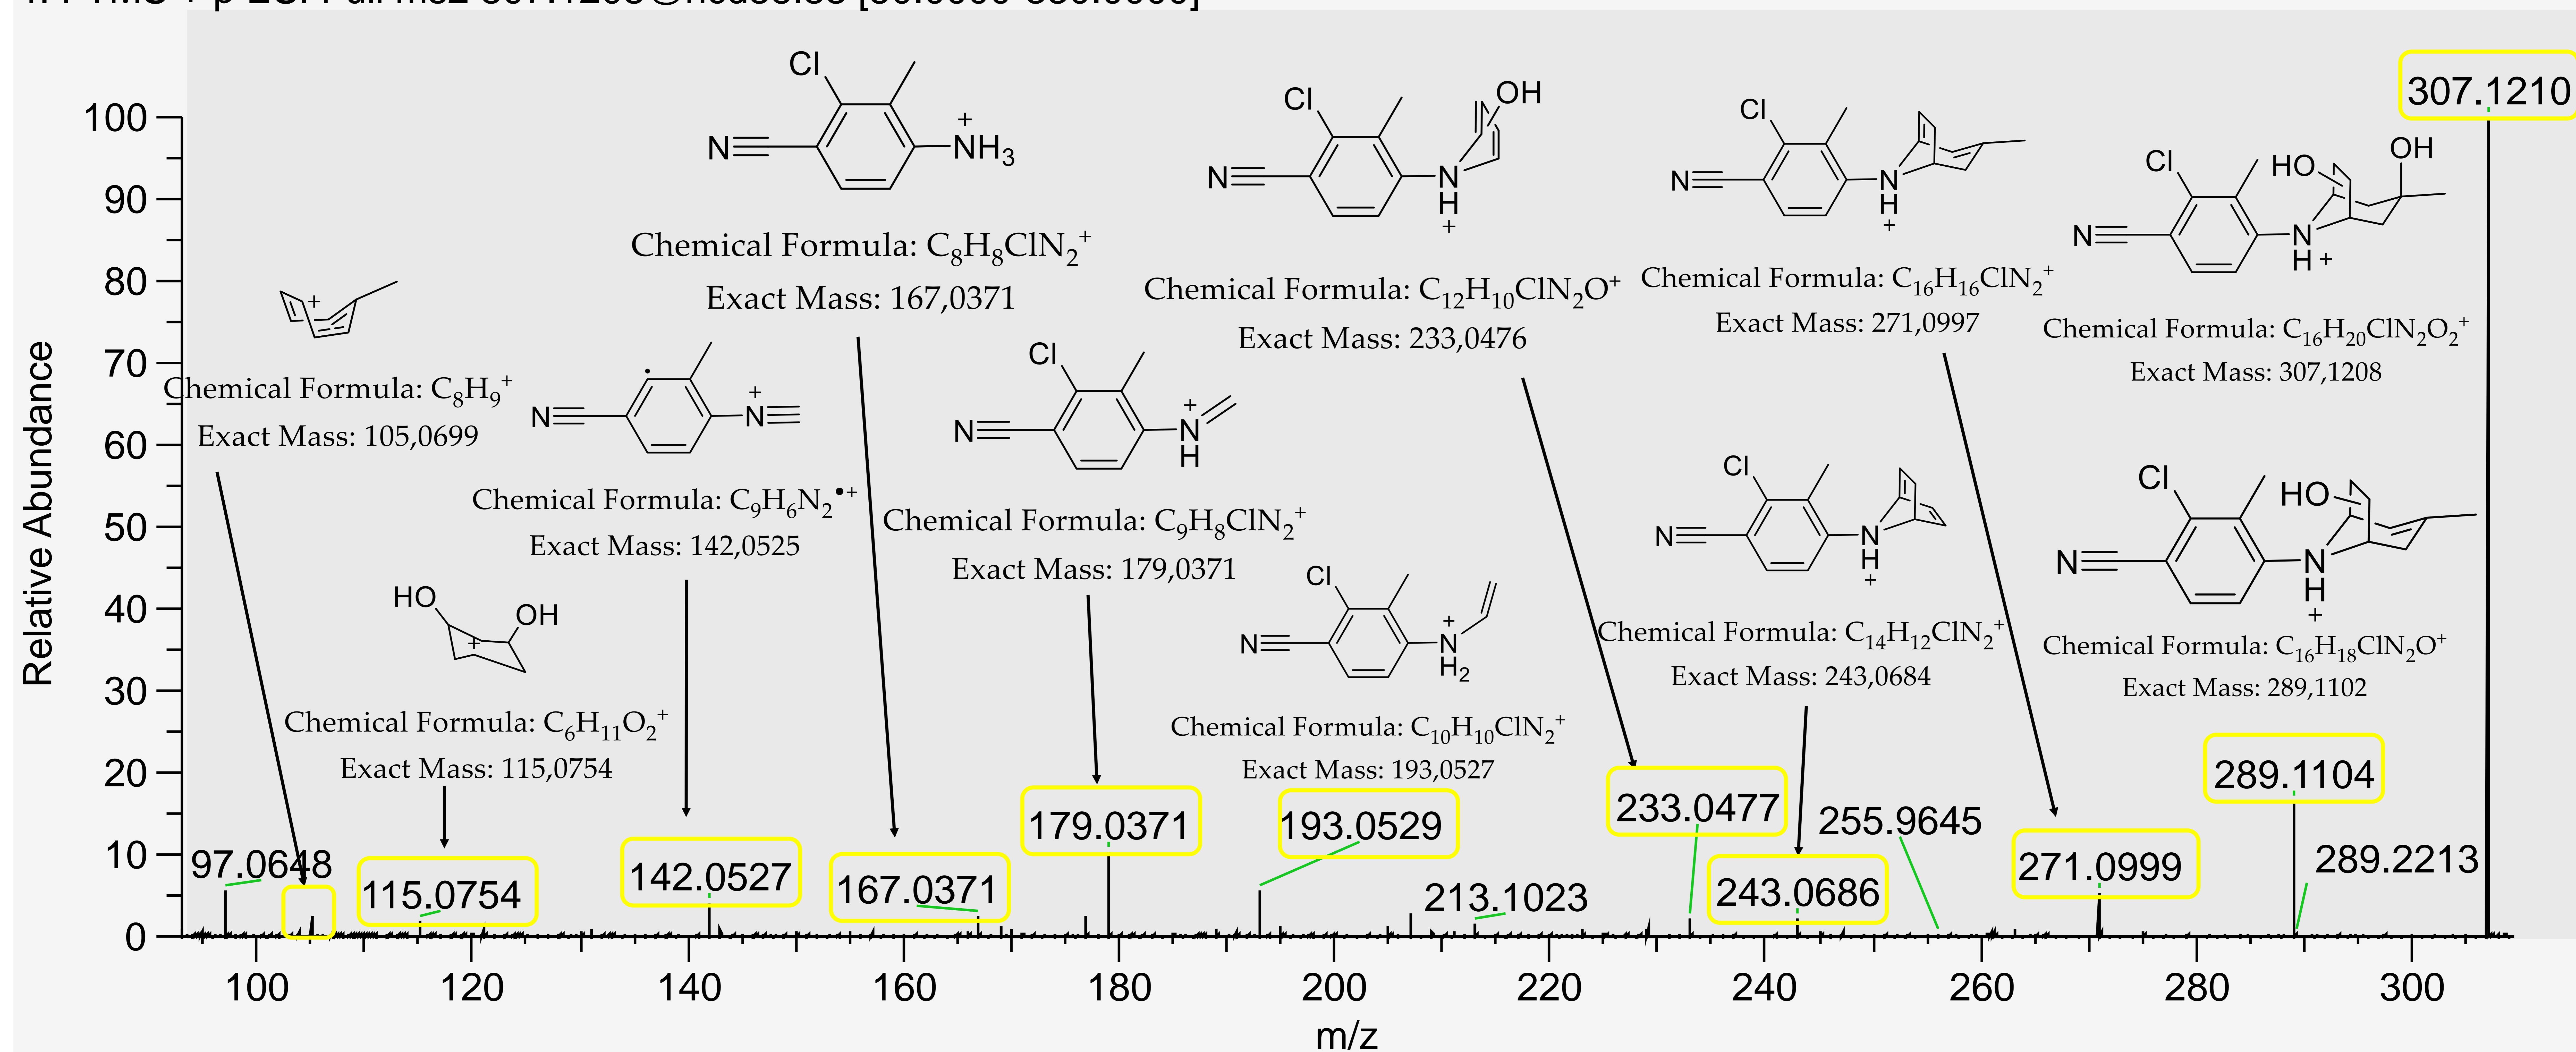



# M1c

## Monohydroxylation

Retention time: 9.14 min

m/z: 307.1209

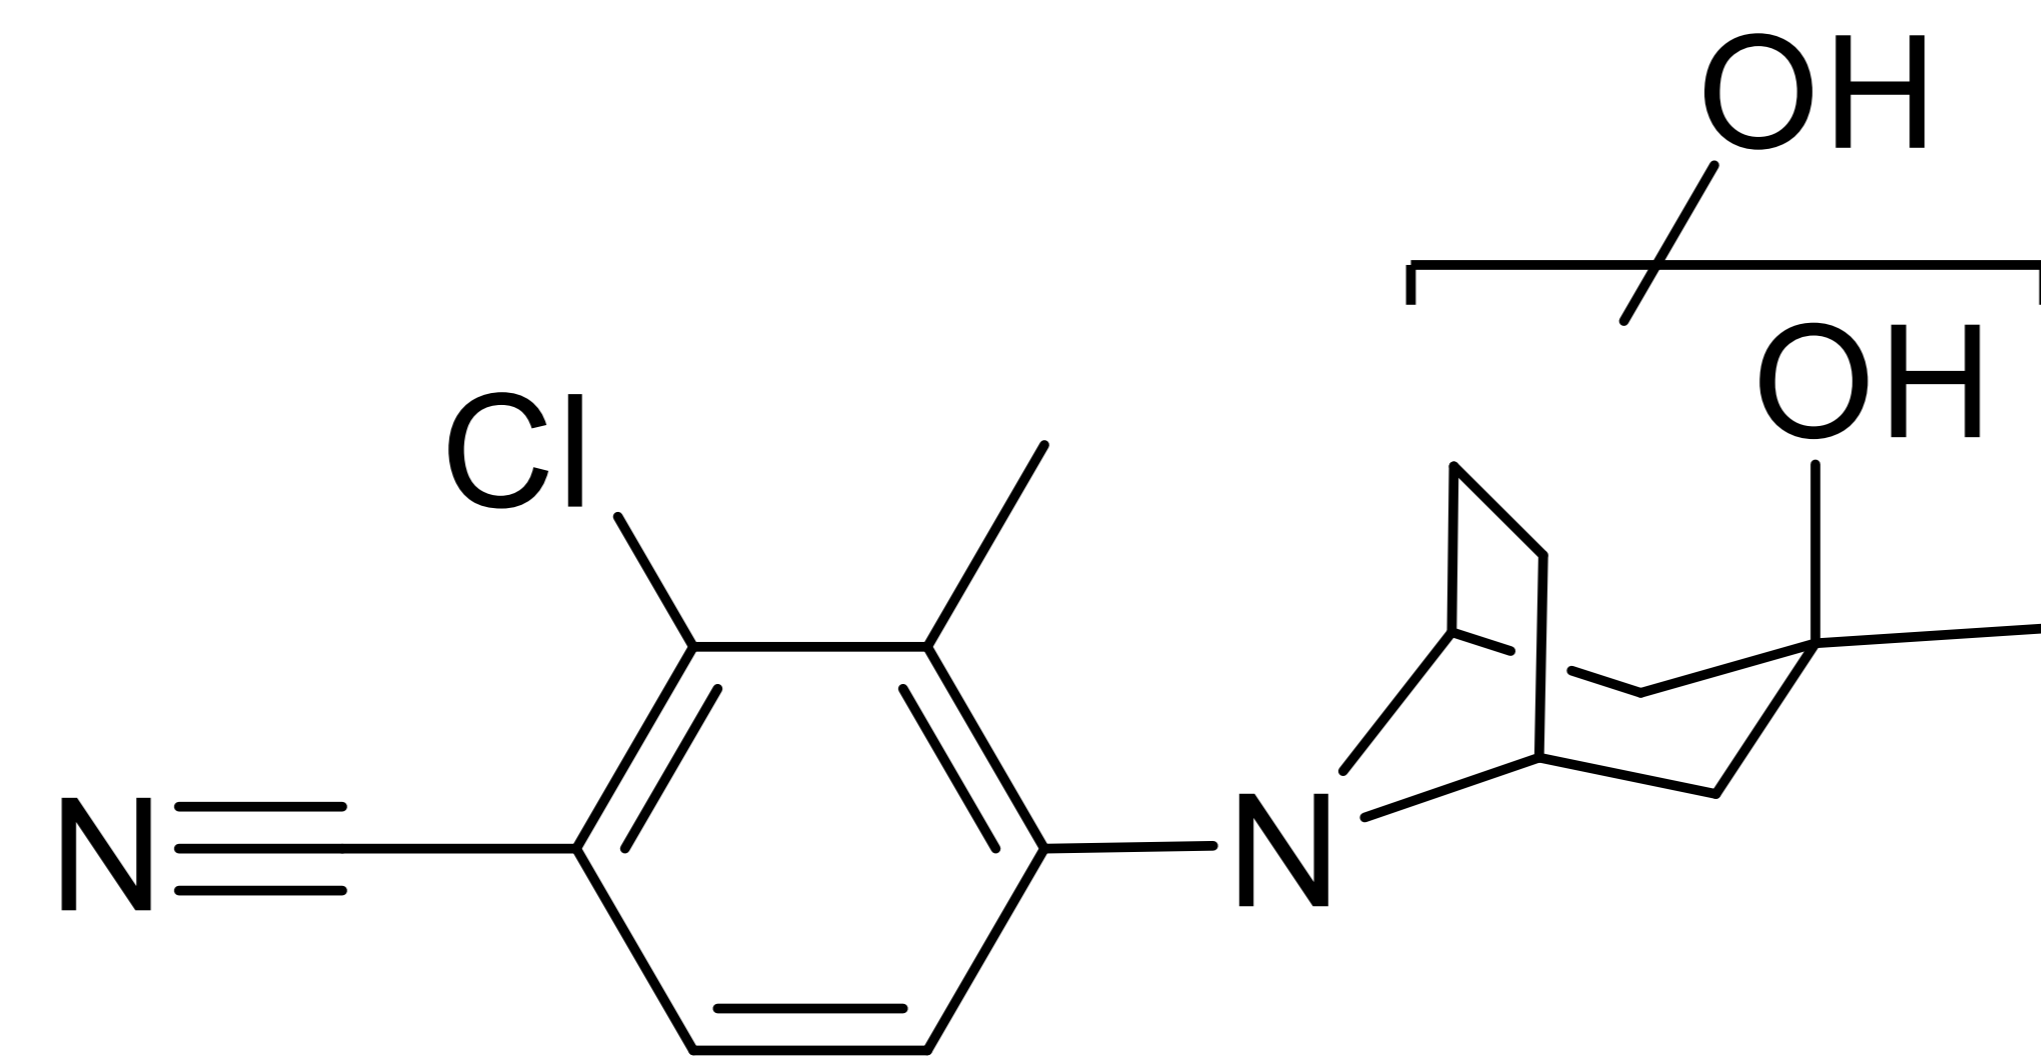

MNB\_20200730\_014 #1921-1937 RT: 9.12-9.19 AV: 17 SB: 24 9.07-9.12 , 9.19-9.24 NL: 8.09E+005  
T: FTMS + p ESI Full ms2 307.1208@hcd38.33 [50.0000-330.0000]

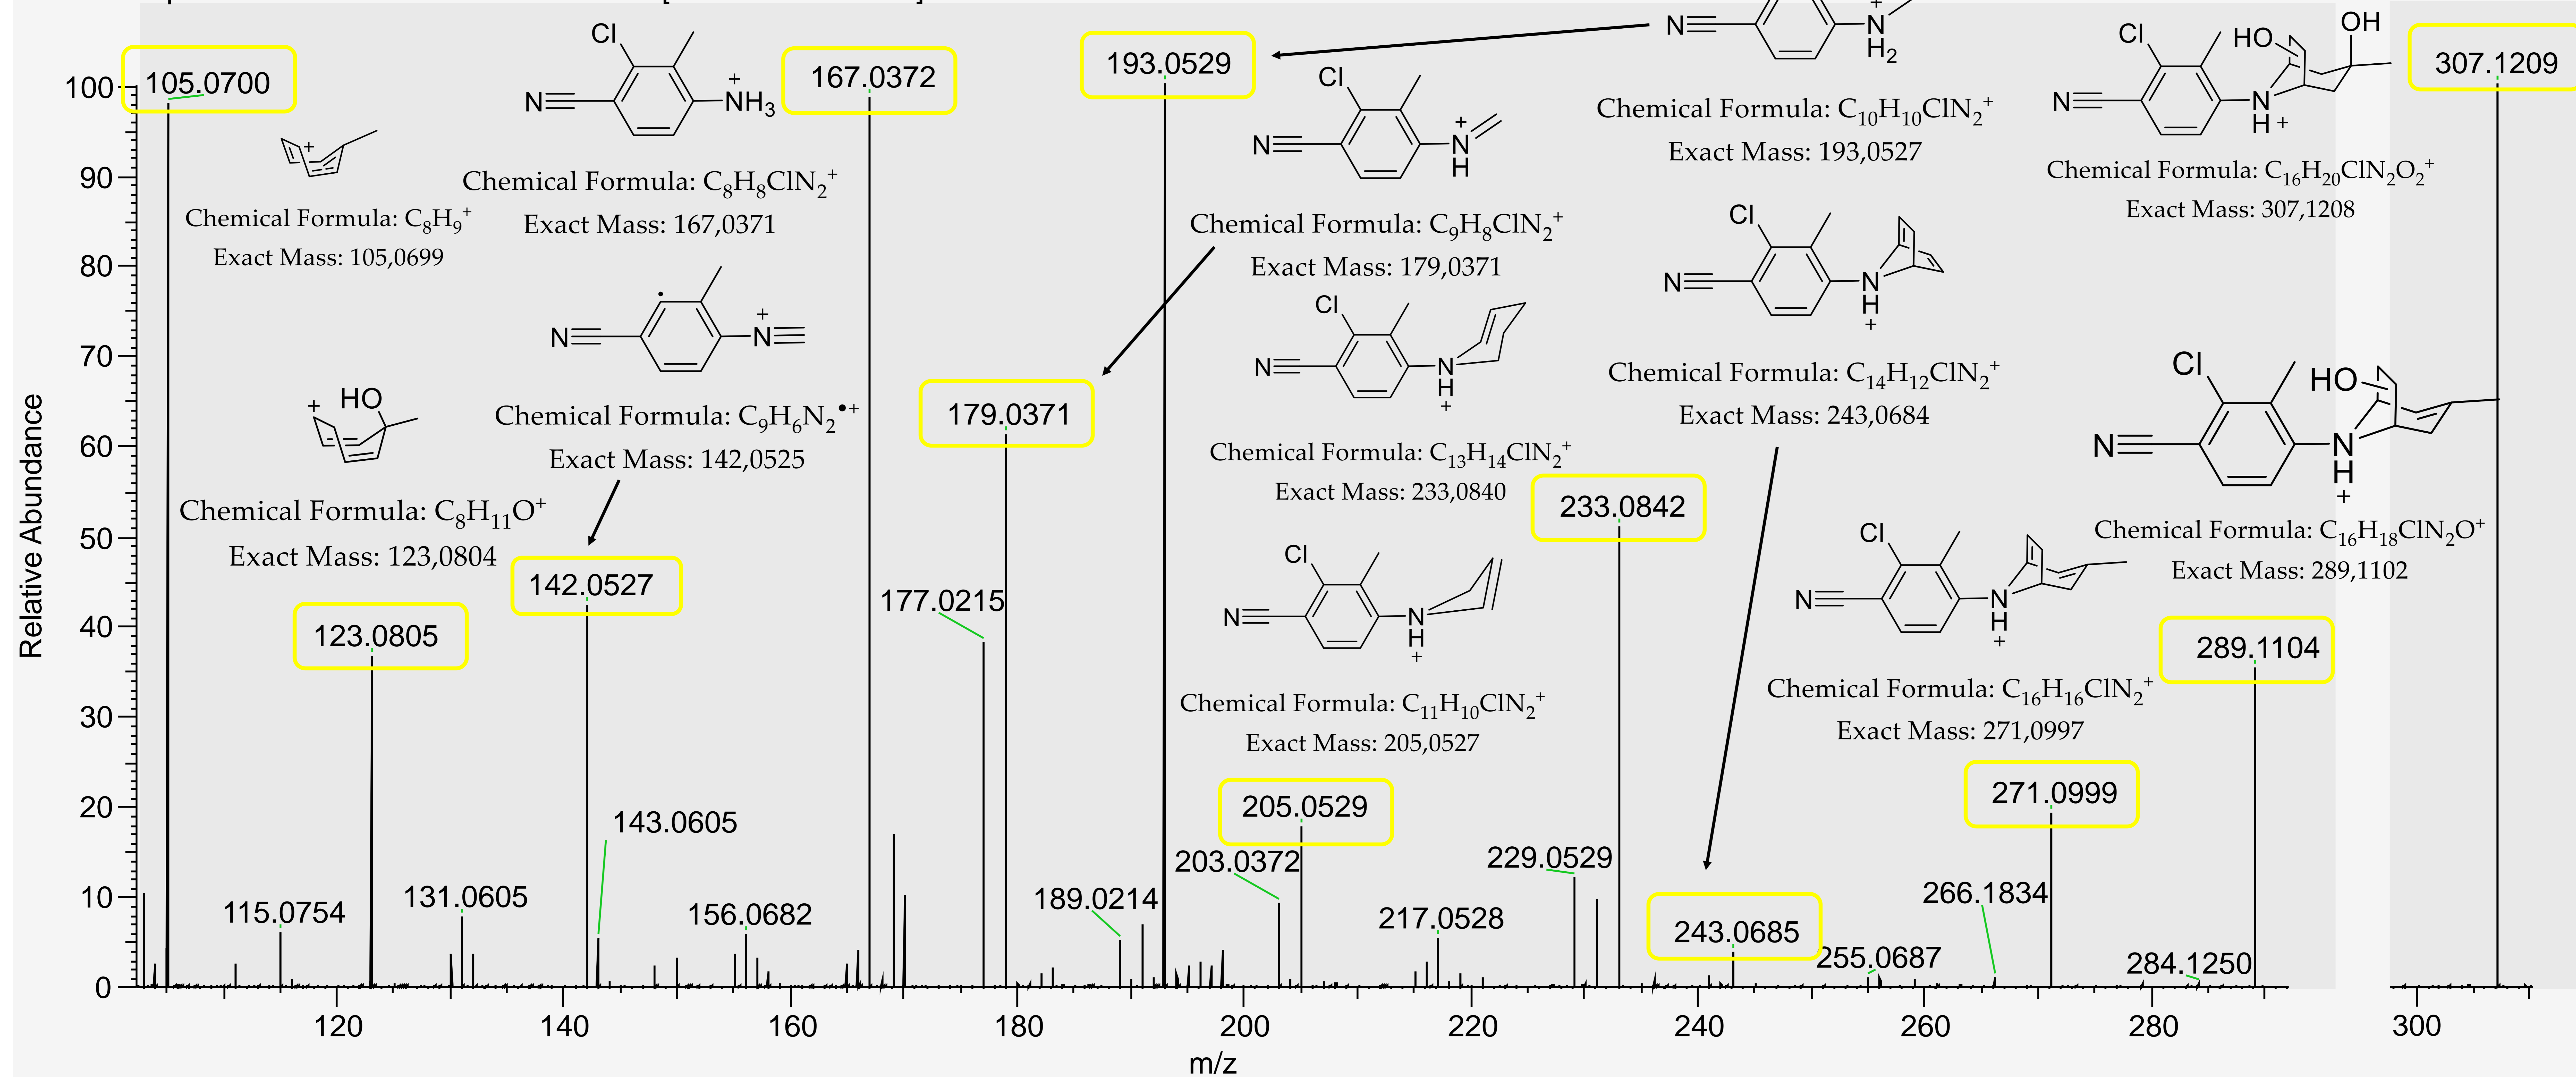



# M2a

## Dihydroxylation

Retention time: 7.03 min

m/z: 323.1159

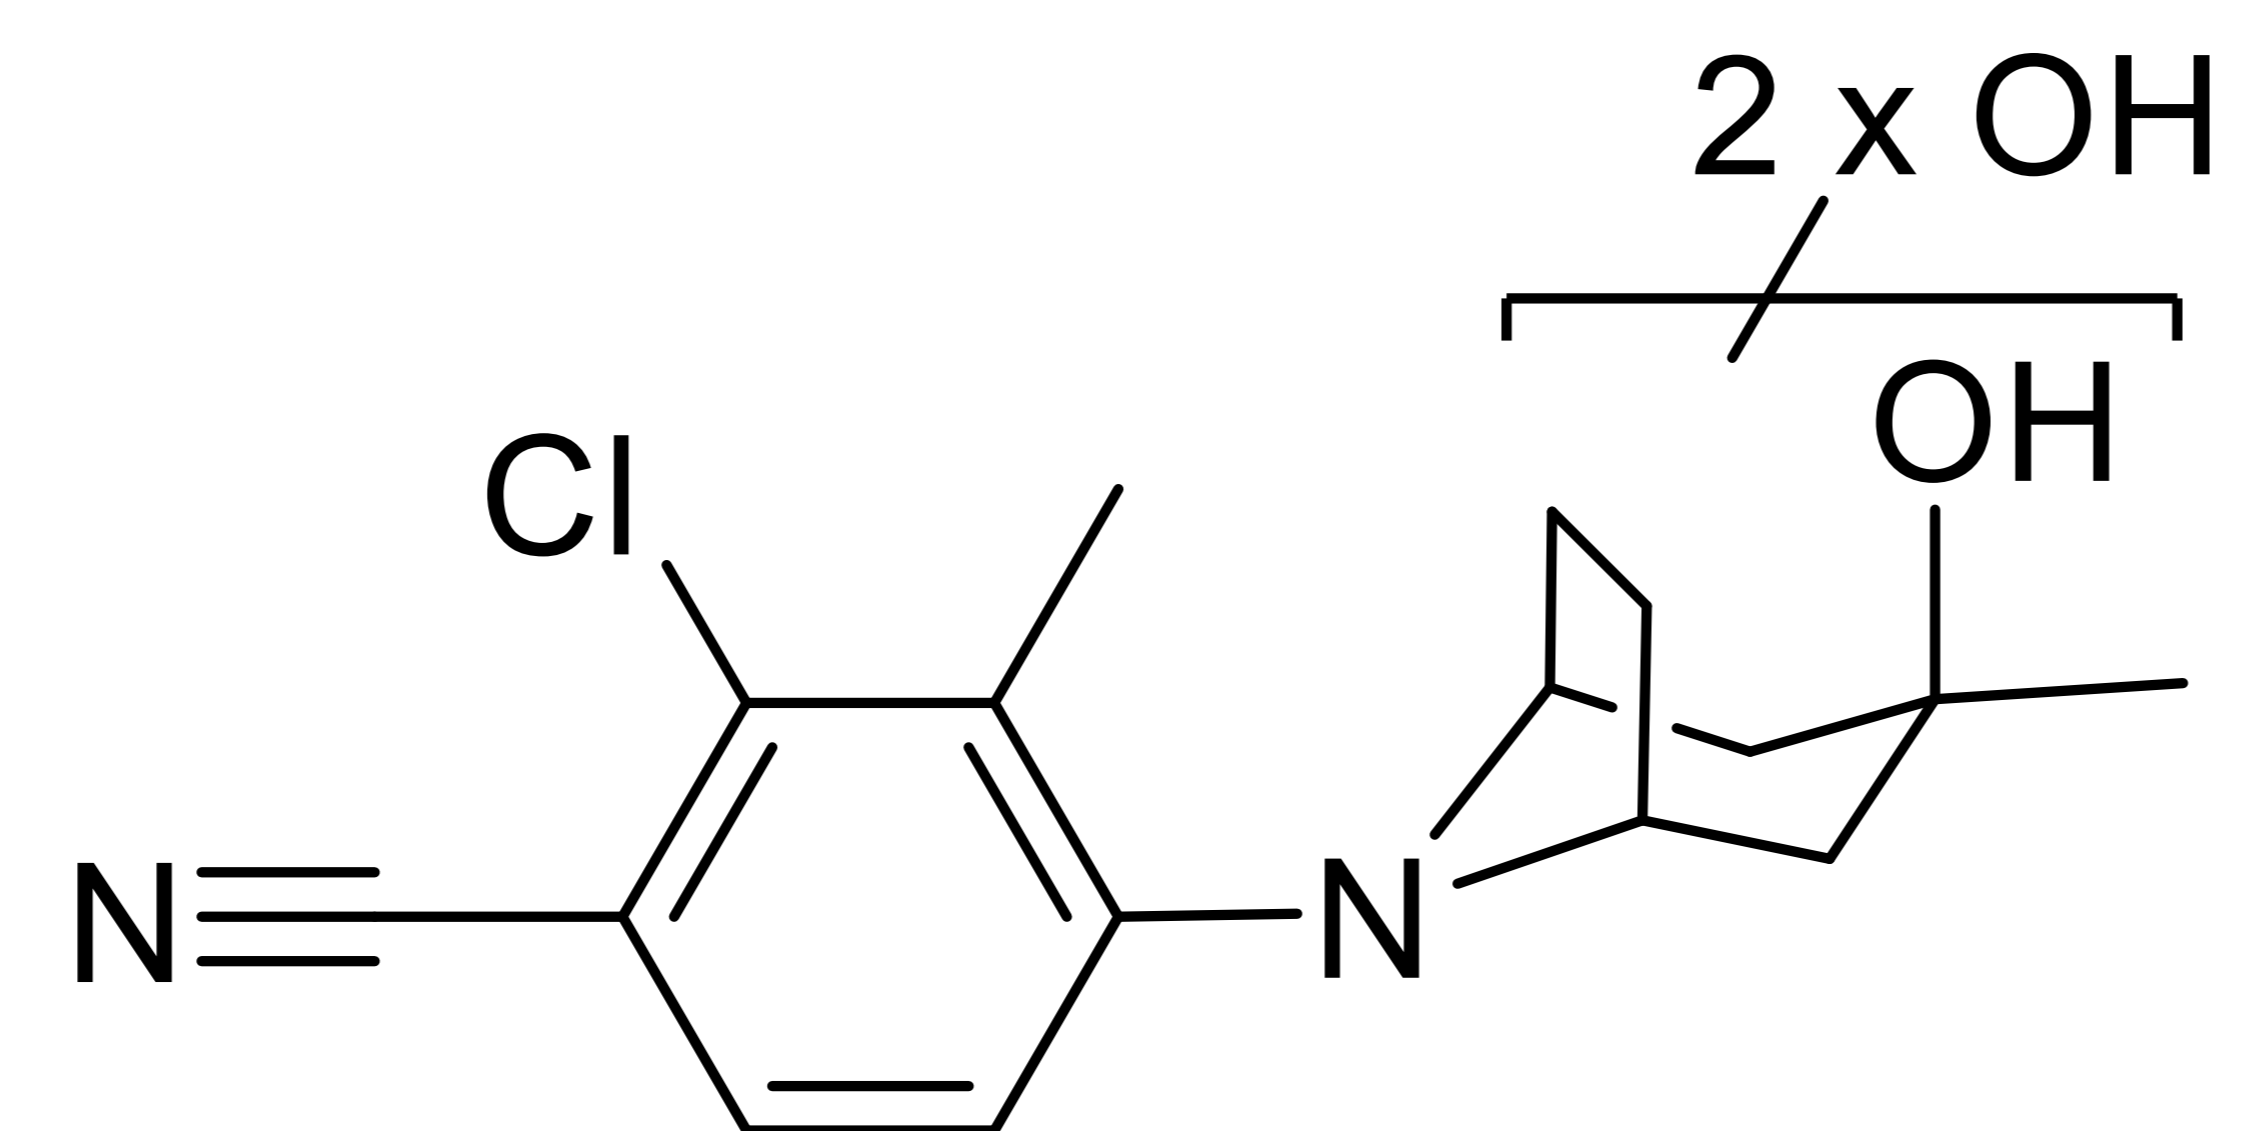

MNB\_20200730\_013 #1449-1465 RT: 7.01-7.08 AV: 17 SB: 24 6.96-7.01 , 7.08-7.13 NL: 1.18E+006  
T: FTMS + p ESI Full ms2 323.1157@hcd38.33 [50.0000-345.0000]

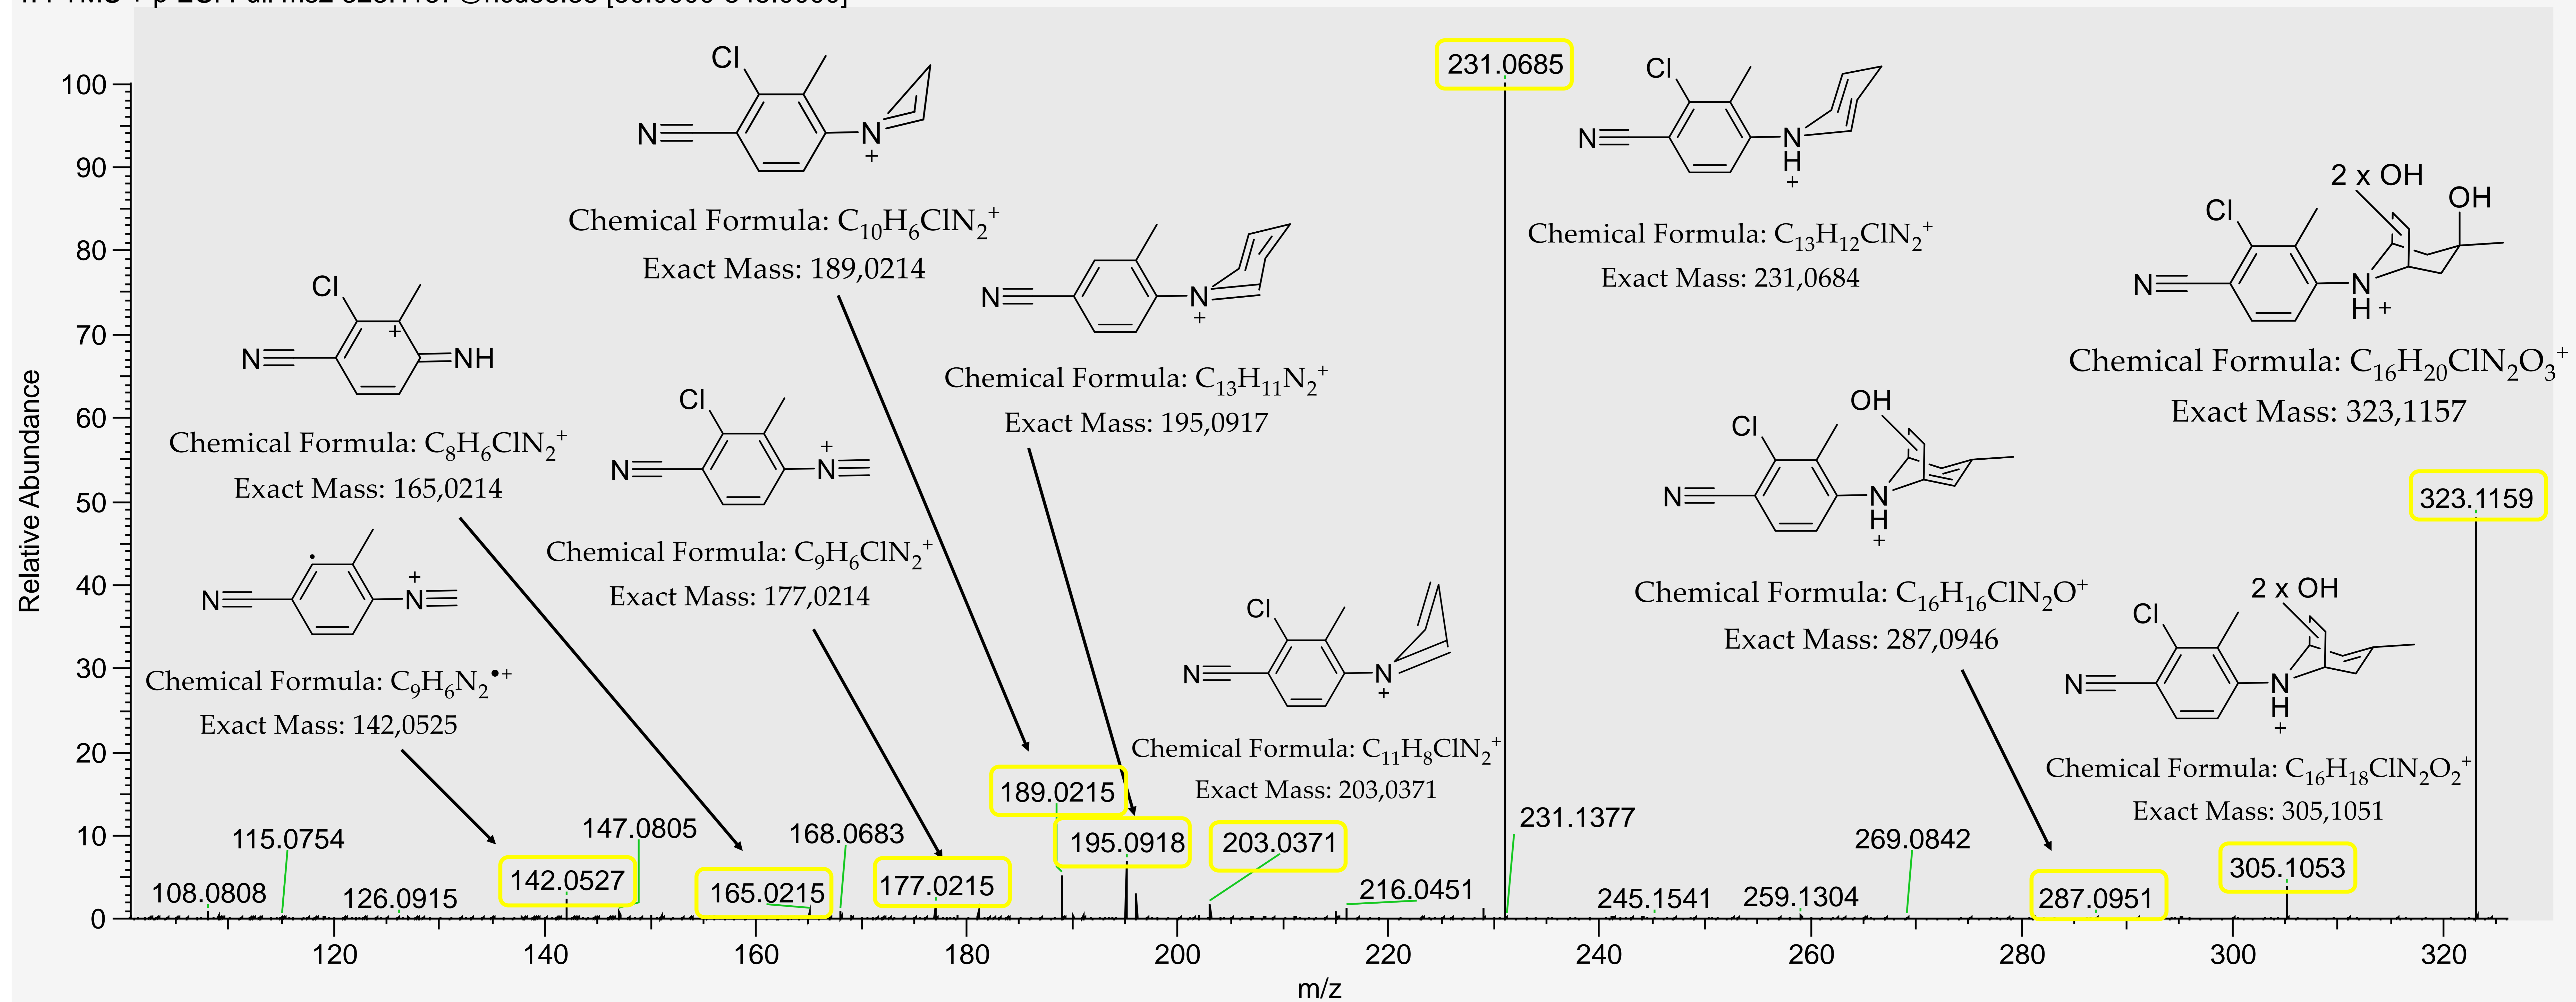



# M2b

Dihydroxylation

Retention time: 7.63 min

m/z: 323.1161

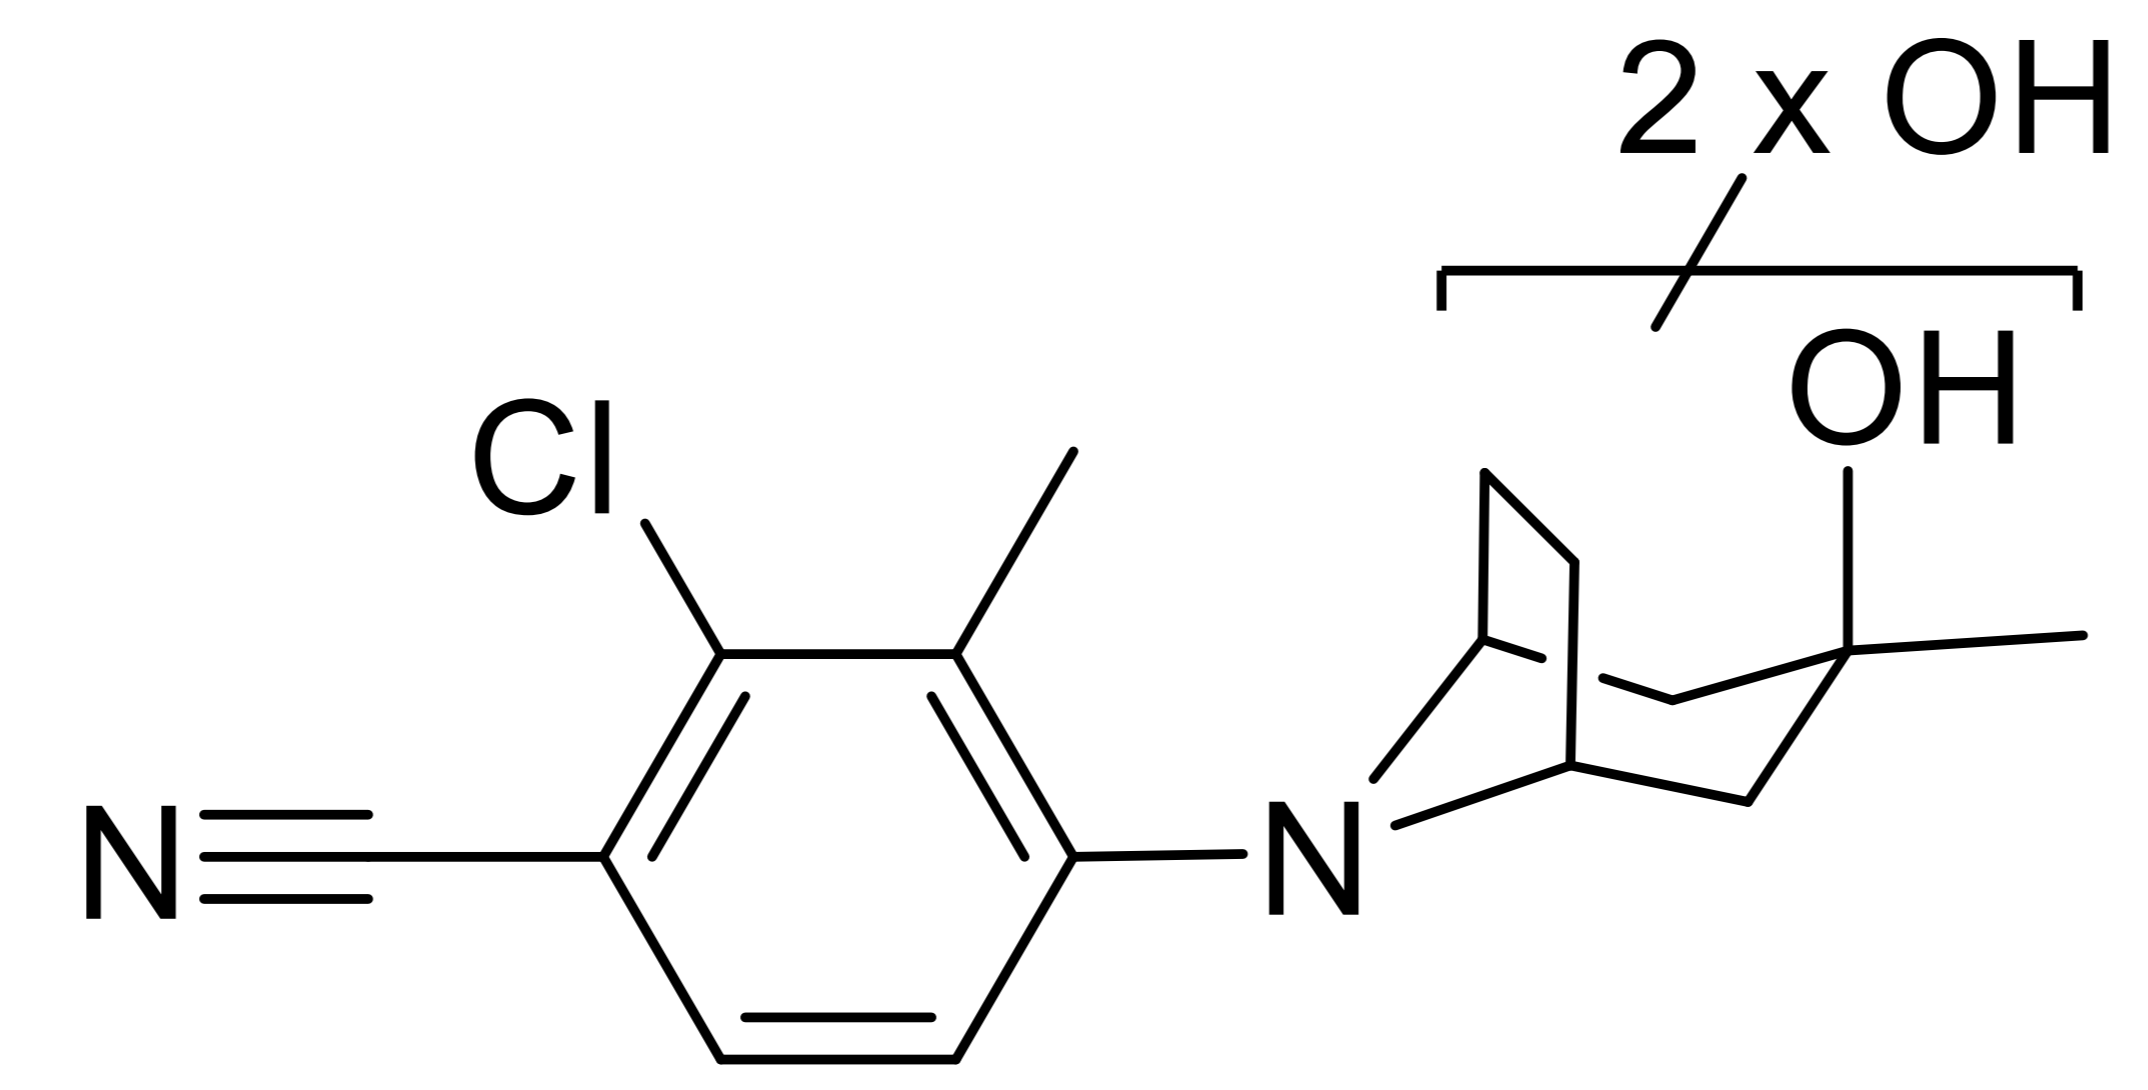

MNB\_20200730\_013 #1583-1595 RT: 7.61-7.66 AV: 13 SB: 14 7.58-7.61 , 7.66-7.69 NL: 2.28E+005  
T: FTMS + p ESI Full ms2 323.1157@hcd38.33 [50.0000-345.0000]

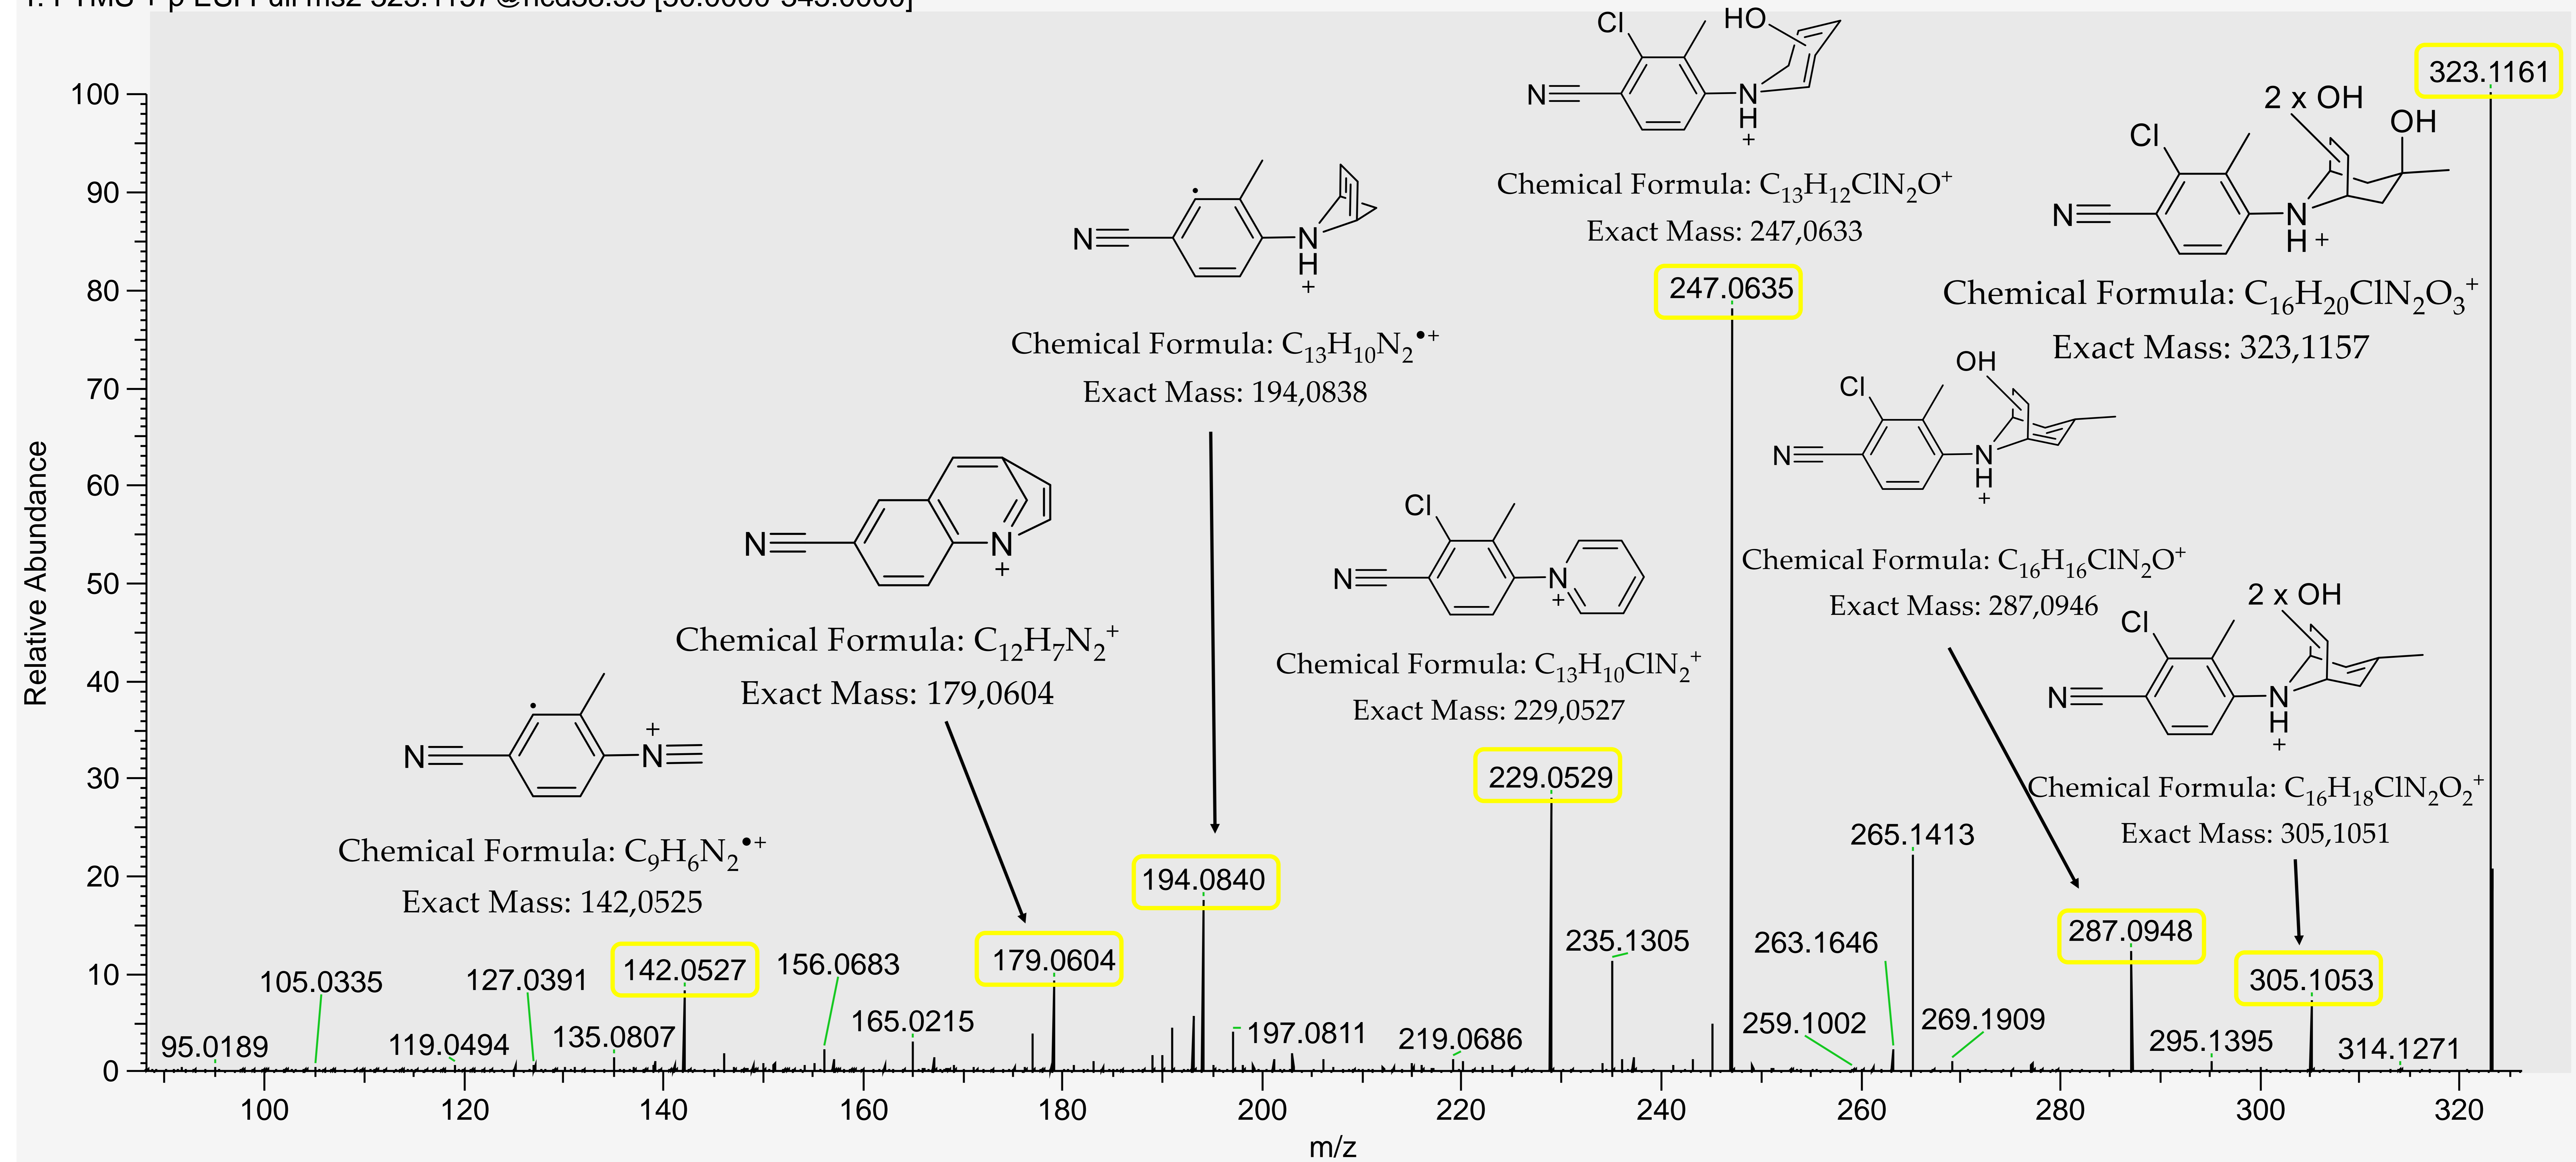



# M3a

Loss of 2H

Retention time: 10.11 min

m/z: 289.1106

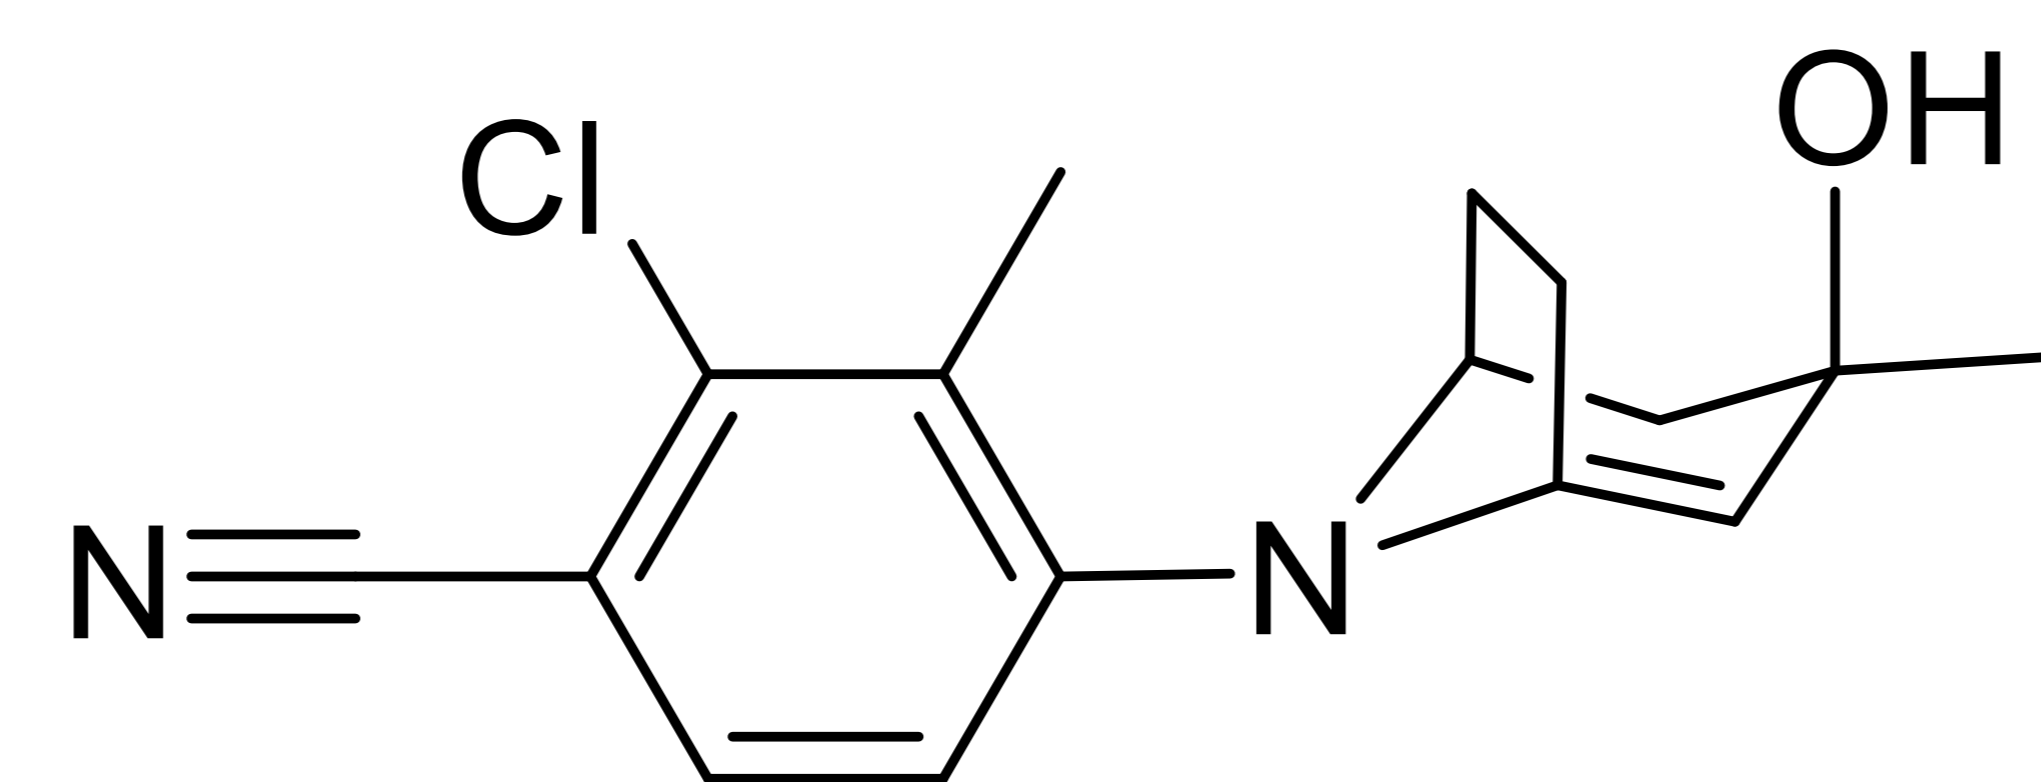

MNB\_20200730\_012 #2097-2108 RT: 10.11-10.16 AV: 12 SB: 74 9.90-10.11 , 10.16-10.30 NL: 3.57E+004  
T: FTMS + p ESI Full ms2 289.1102@hcd38.33 [50.0000-315.0000]

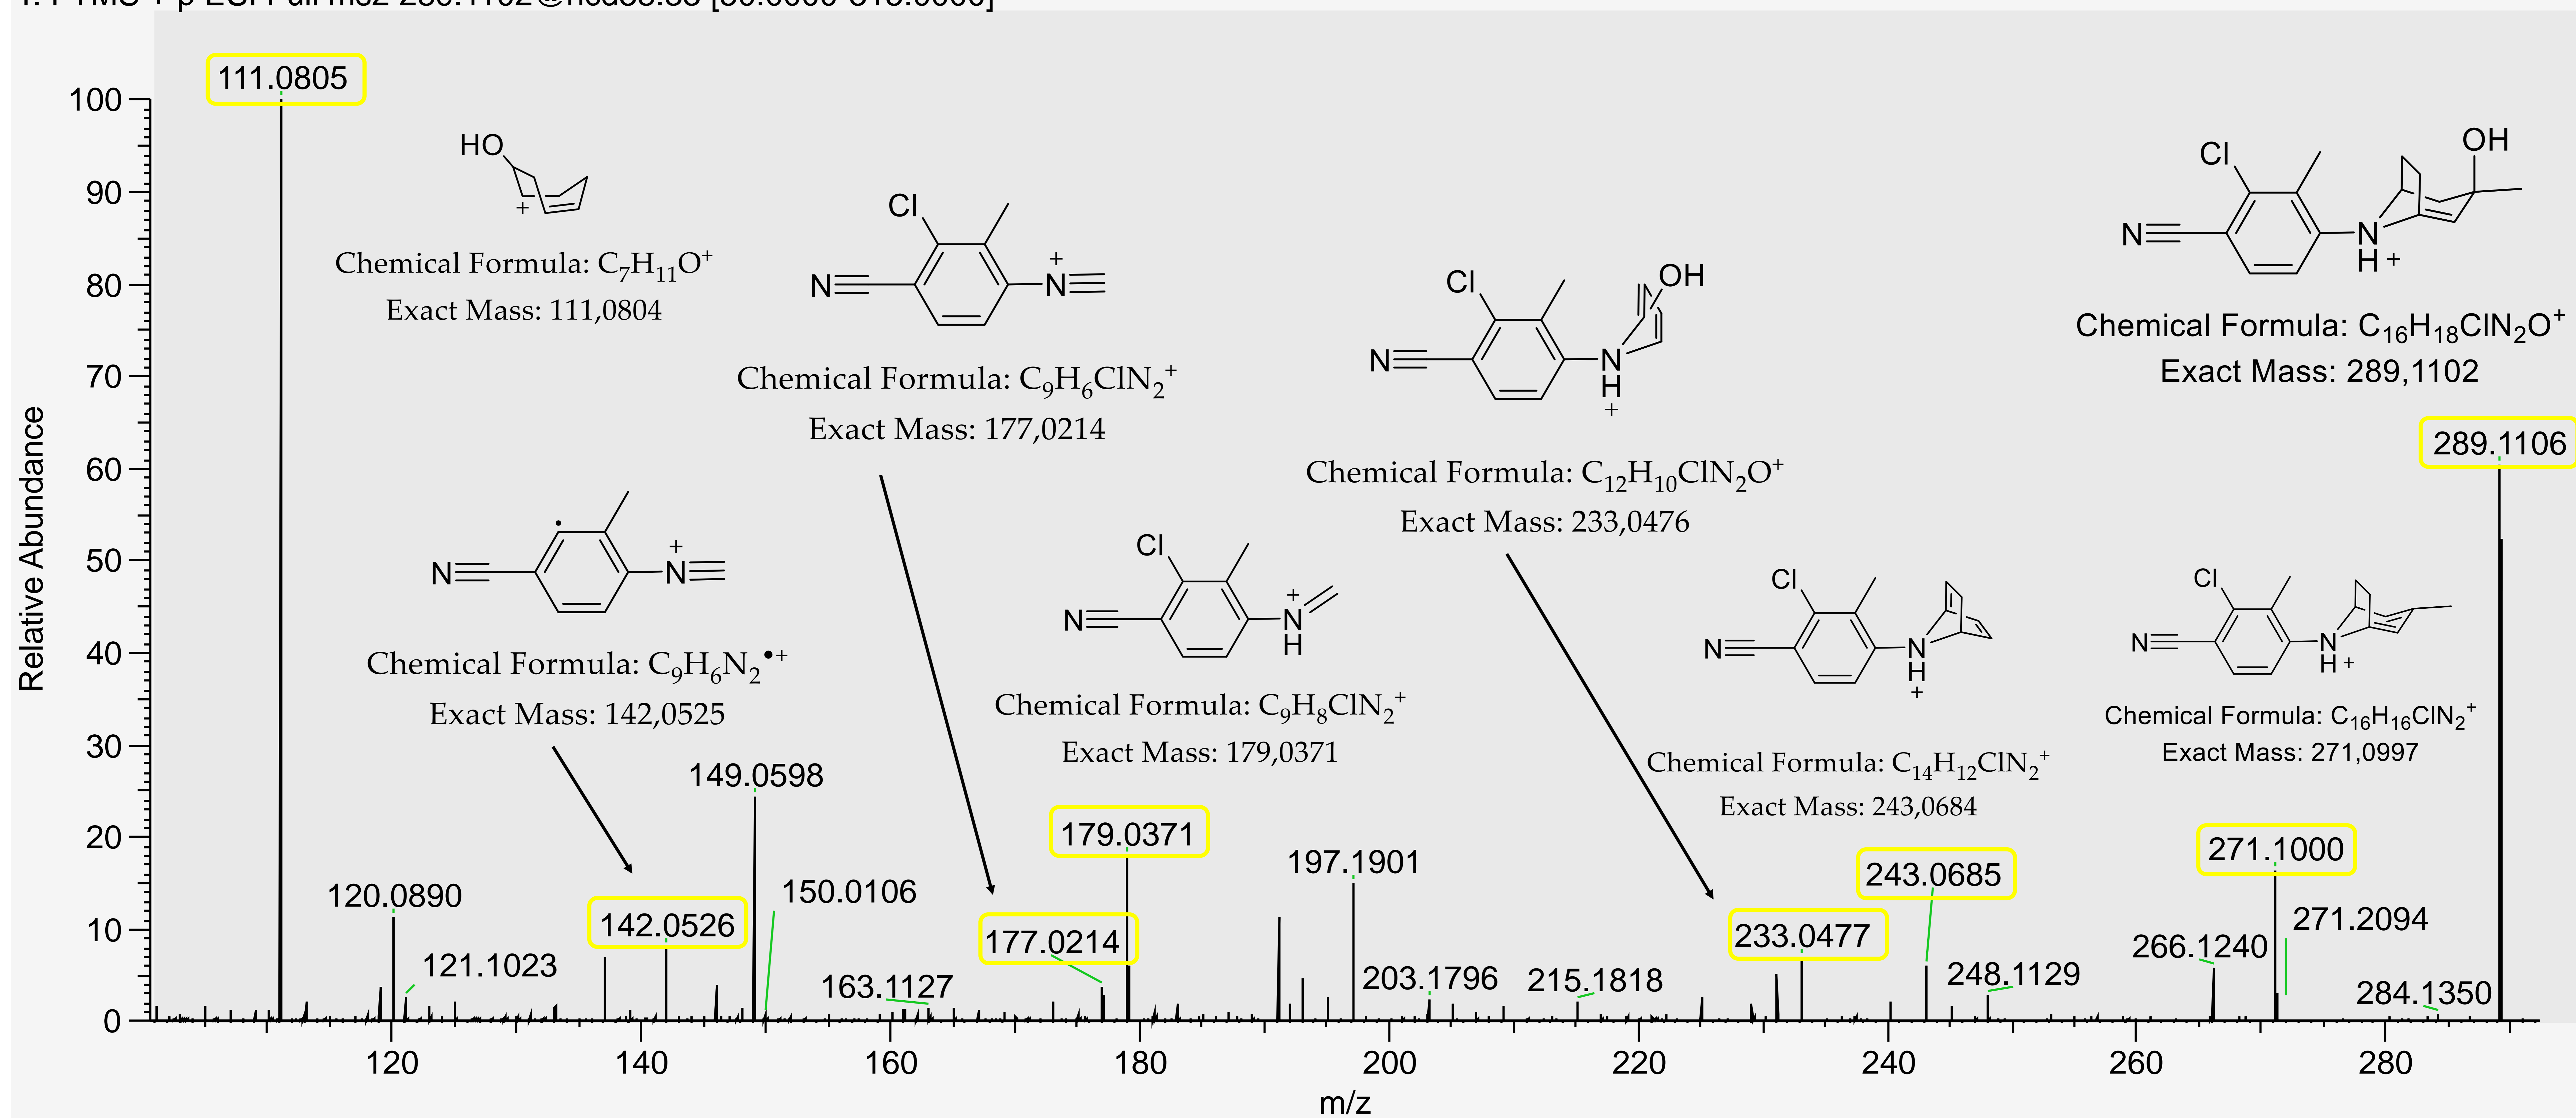



# M3b

Loss of 2H

Retention time: 11.56 min

m/z: 289.1108

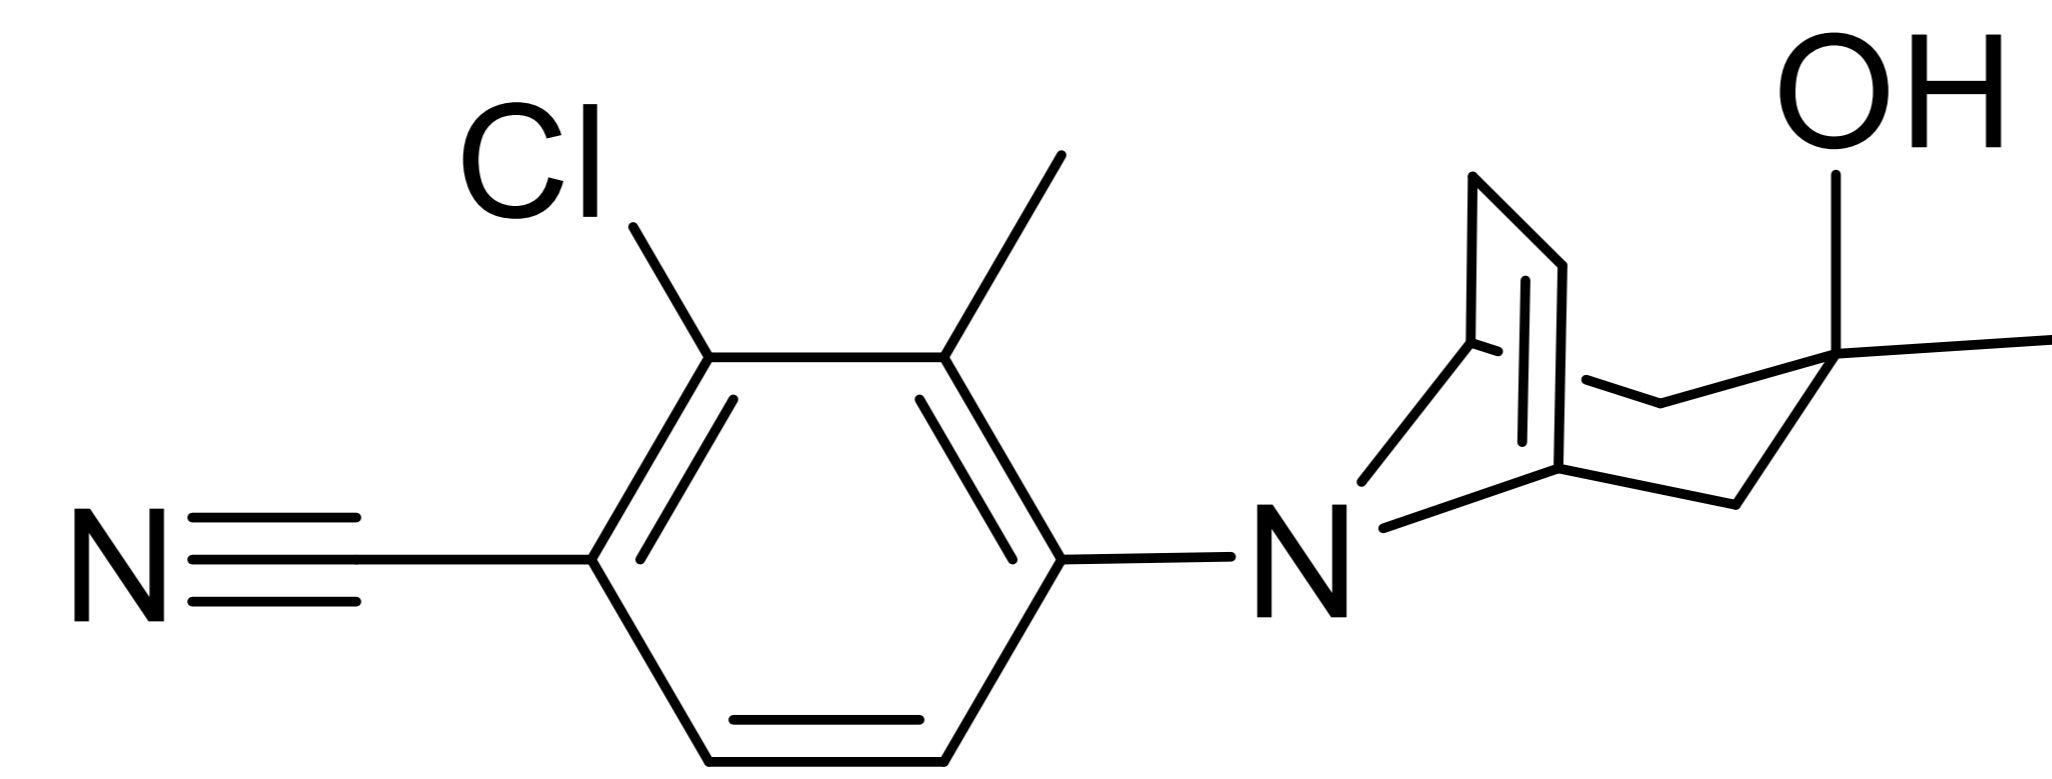

MNB\_20200730\_012 #2391-2405 RT: 11.53-11.6 AV: 15 SB: 40 11.45-11.53, 11.60-11.70 NL: 9.36E+003  
T: FTMS + p ESI Full ms2 289.1102@hcd38.33 [50.0000-315.0000]

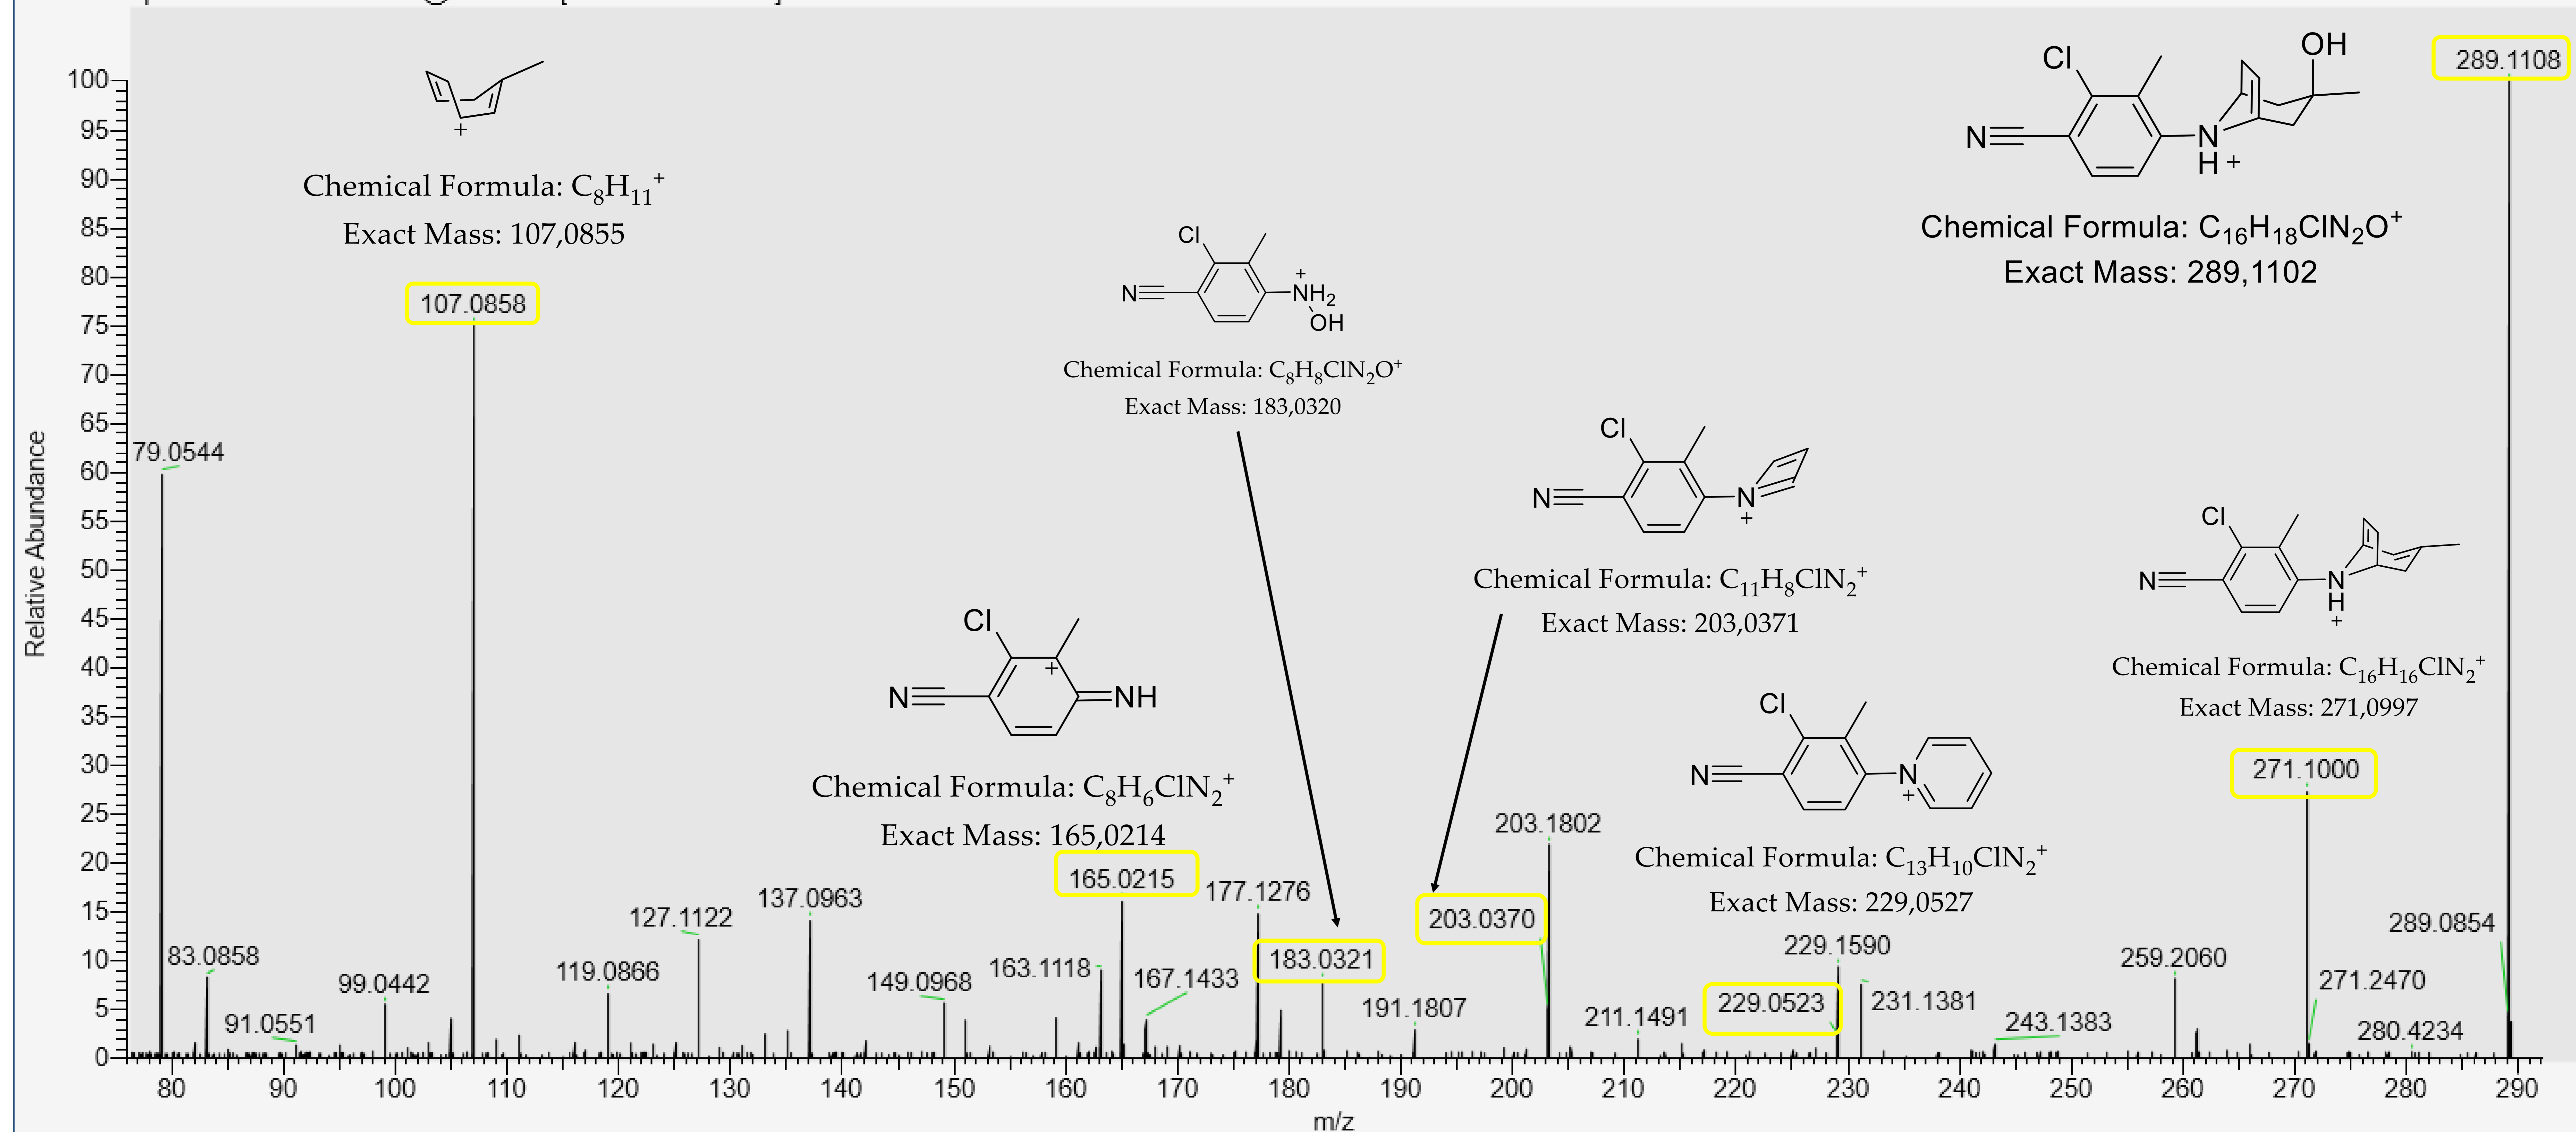



# M4a

Monohydroxylation + loss of 2H

Retention time: 8.88 min

m/z: 305.1054

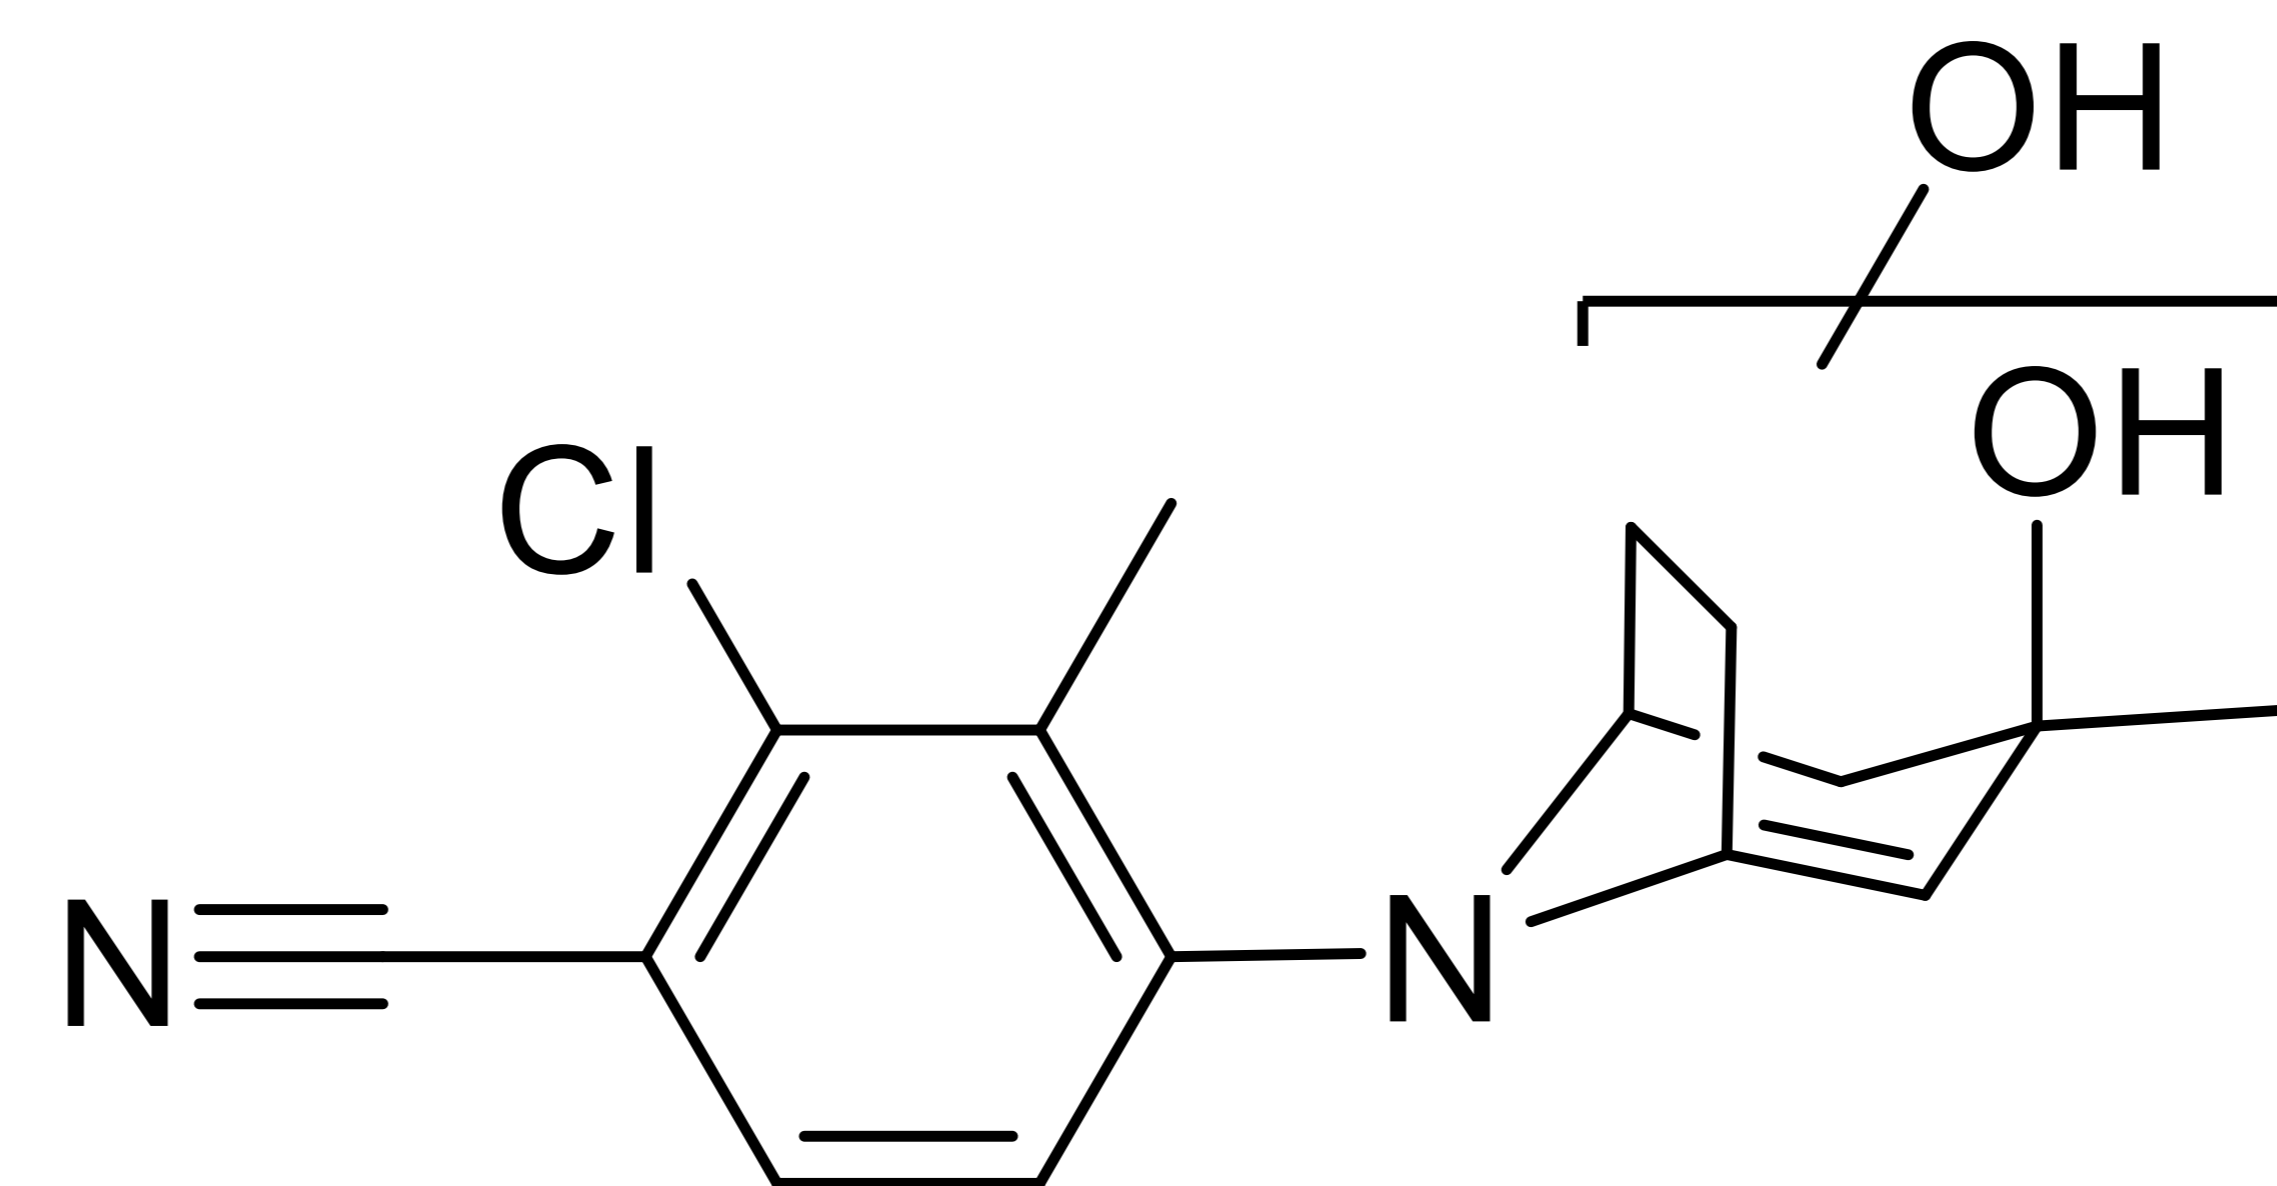

MNB\_20200730\_009 #1855-1871 RT: 8.86-8.93 AV: 17 SB: 28 8.80-8.86 , 8.93-8.99 NL: 9.49E+004

T: FTMS + p ESI Full ms2 305.1051 @hcd38.33 [50.0000-330.0000]

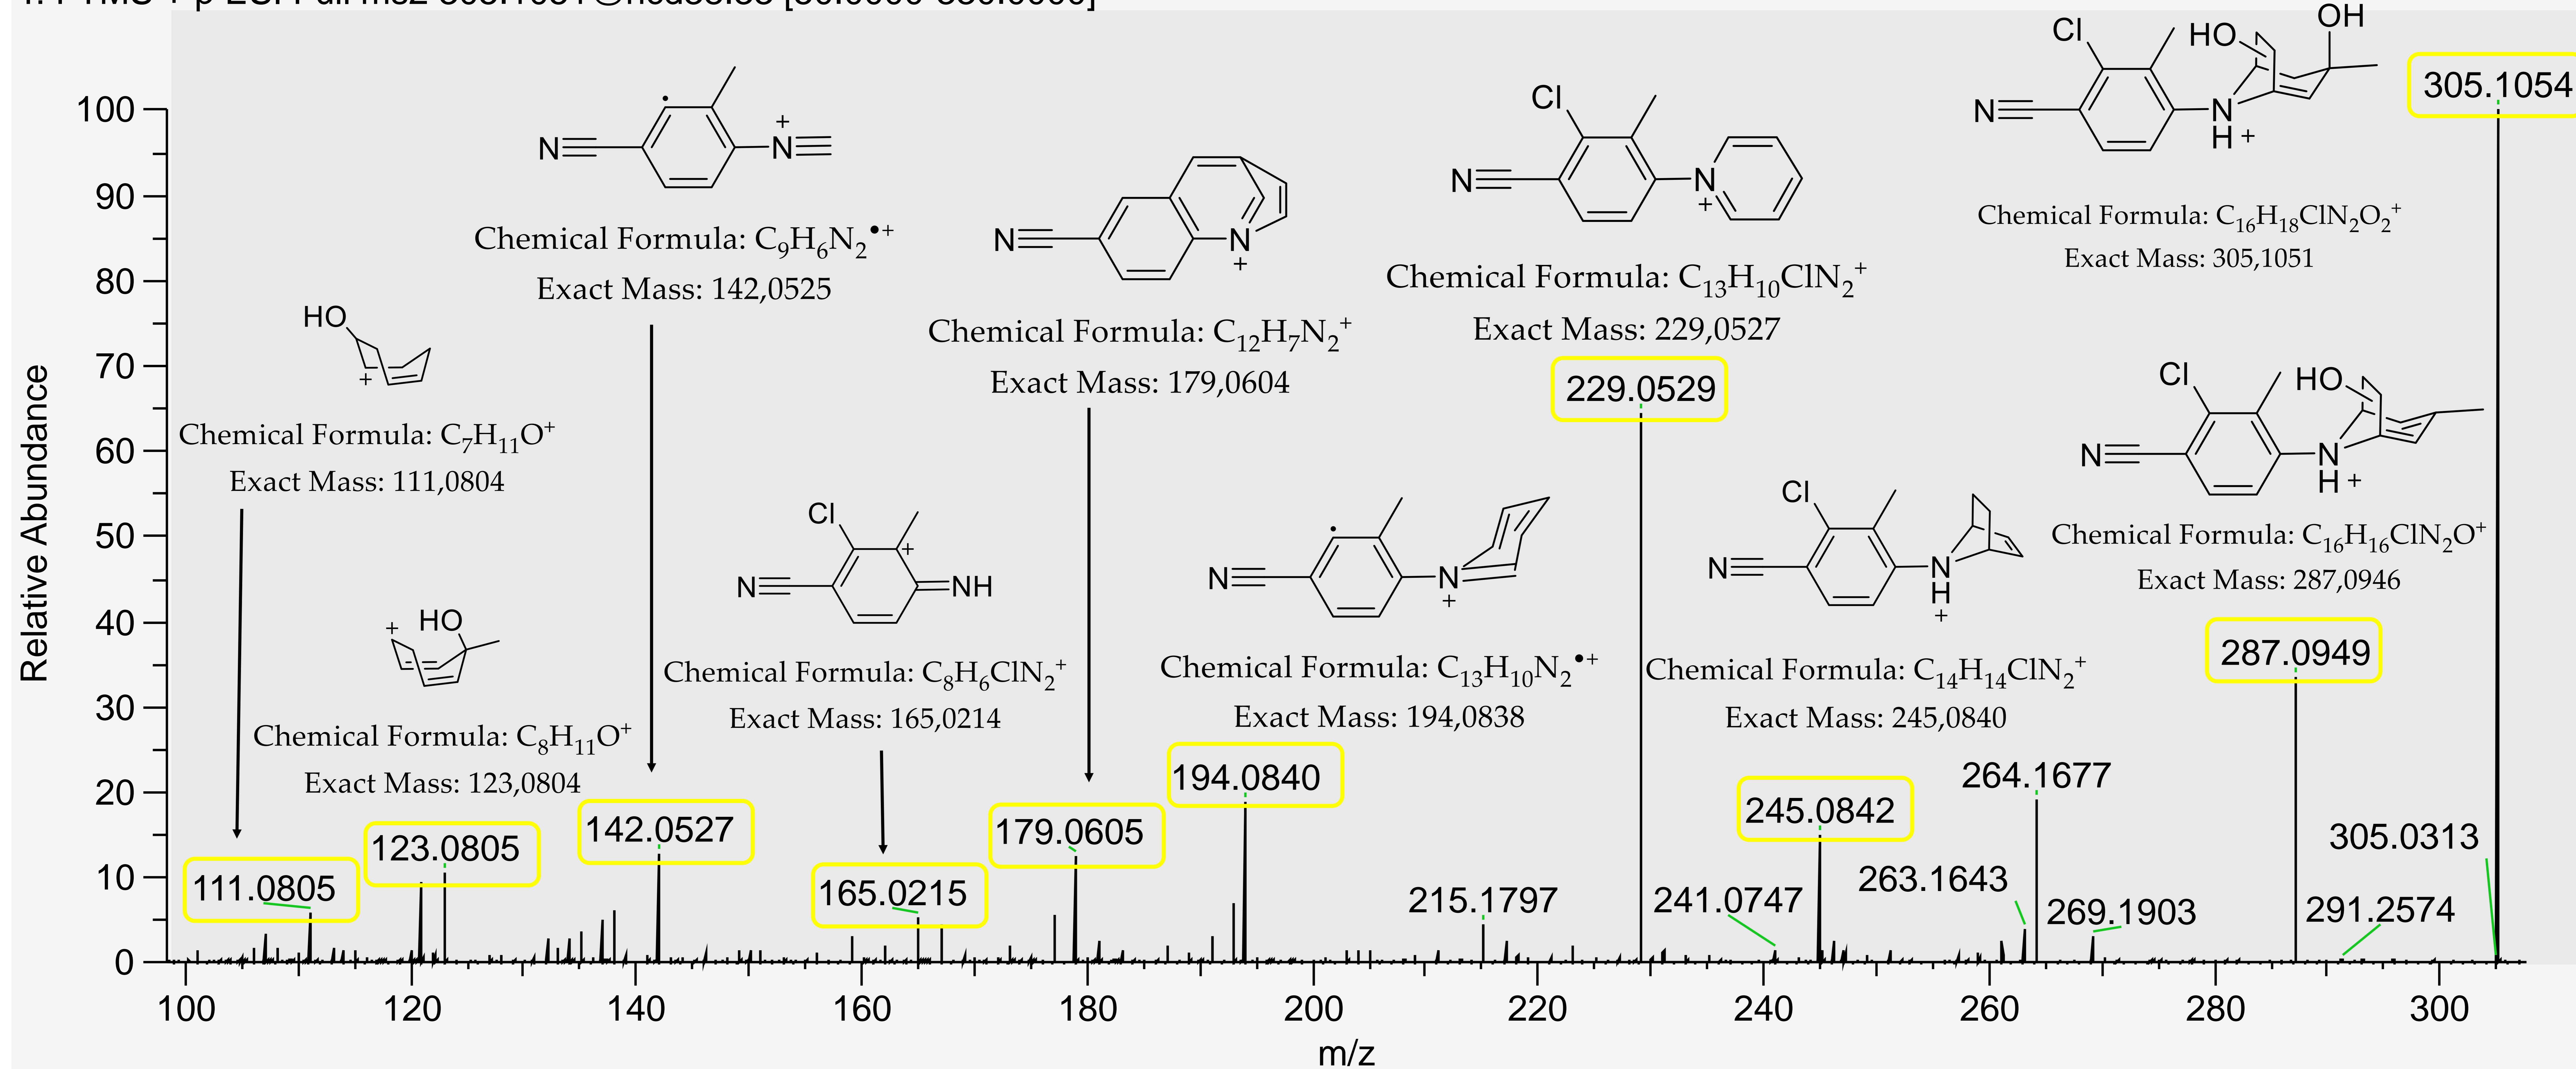



# M4b

Monohydroxylation + loss of 2H

Retention time: 9.83 min

m/z: 305.1053

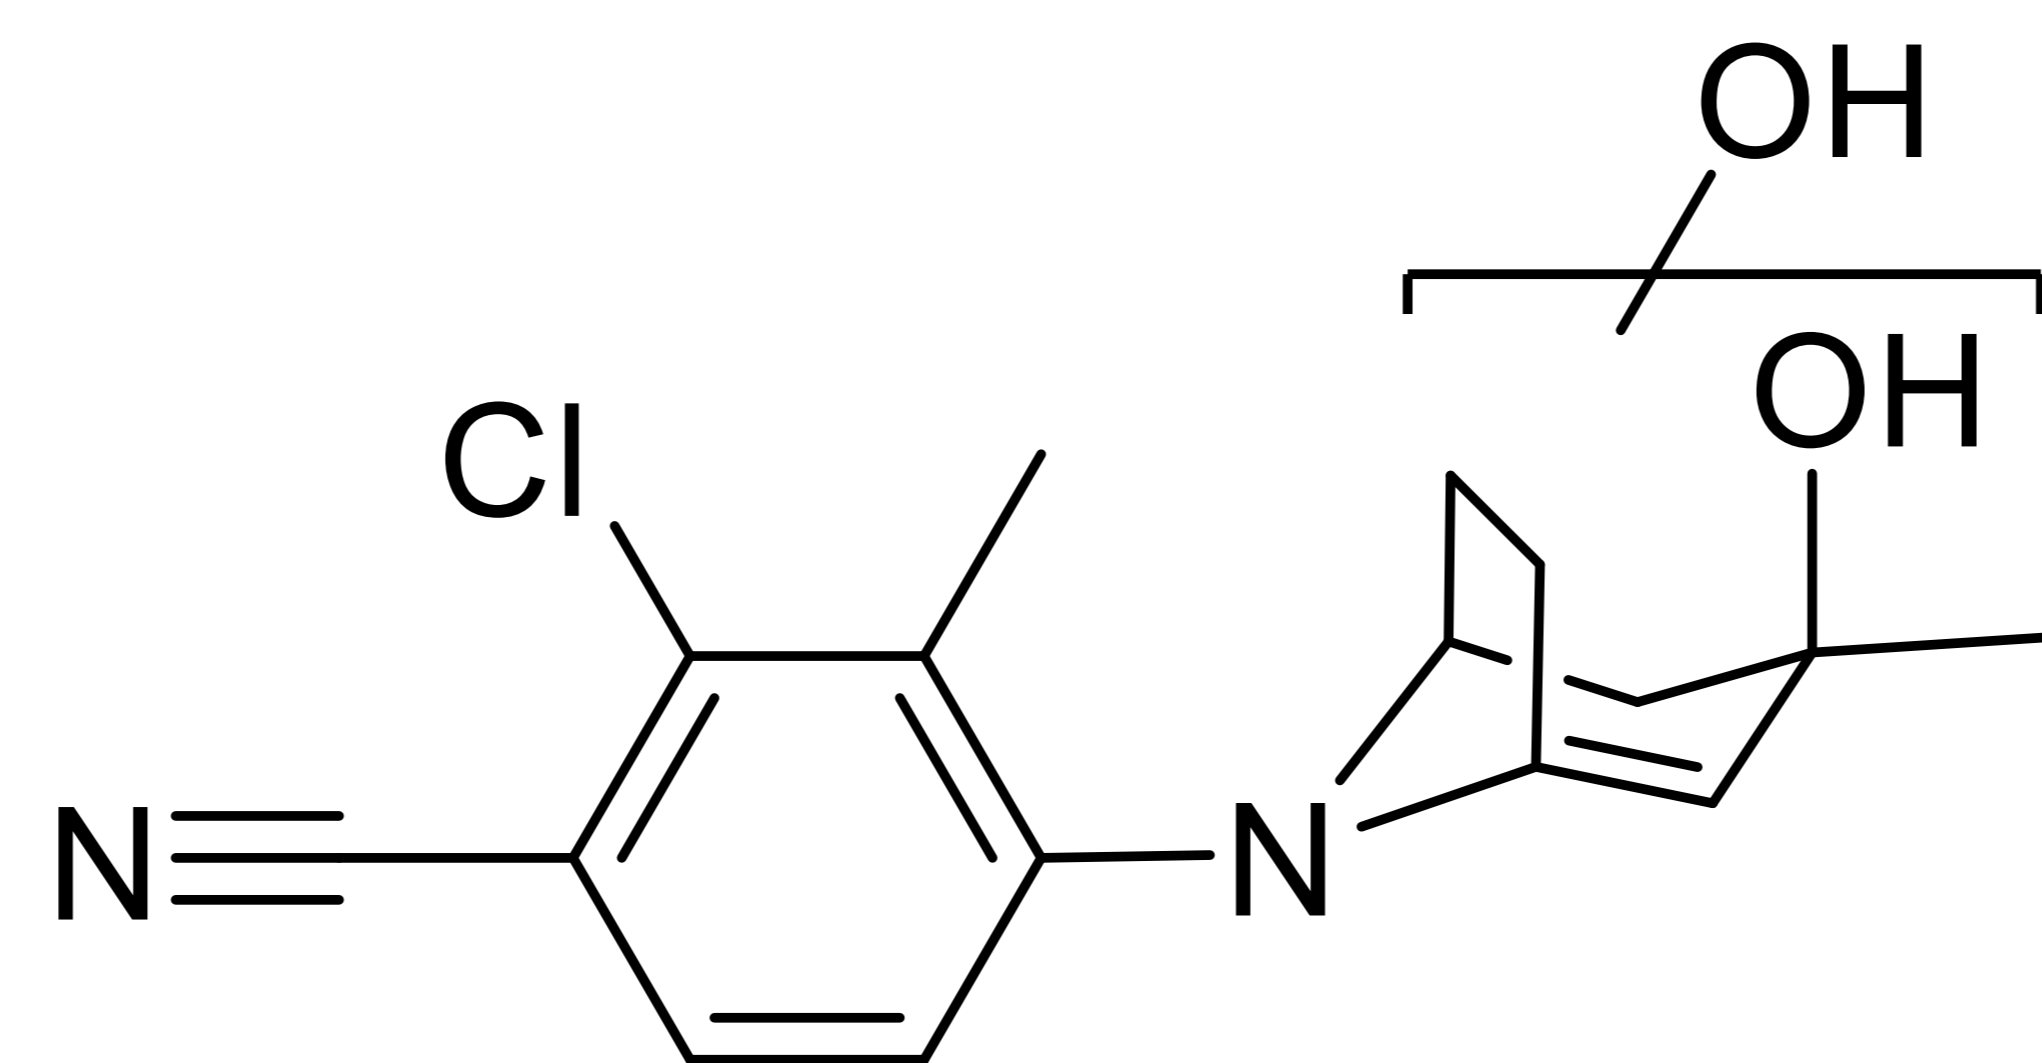

MNB\_20200730\_009 #2067-2080 RT: 9.82-9.88 AV: 14 SB: 28 9.75-9.82 , 9.88-9.93 NL: 1.65E+005

T: FTMS + p ESI Full ms2 305.1051 @hcd38.33 [50.0000-330.0000]

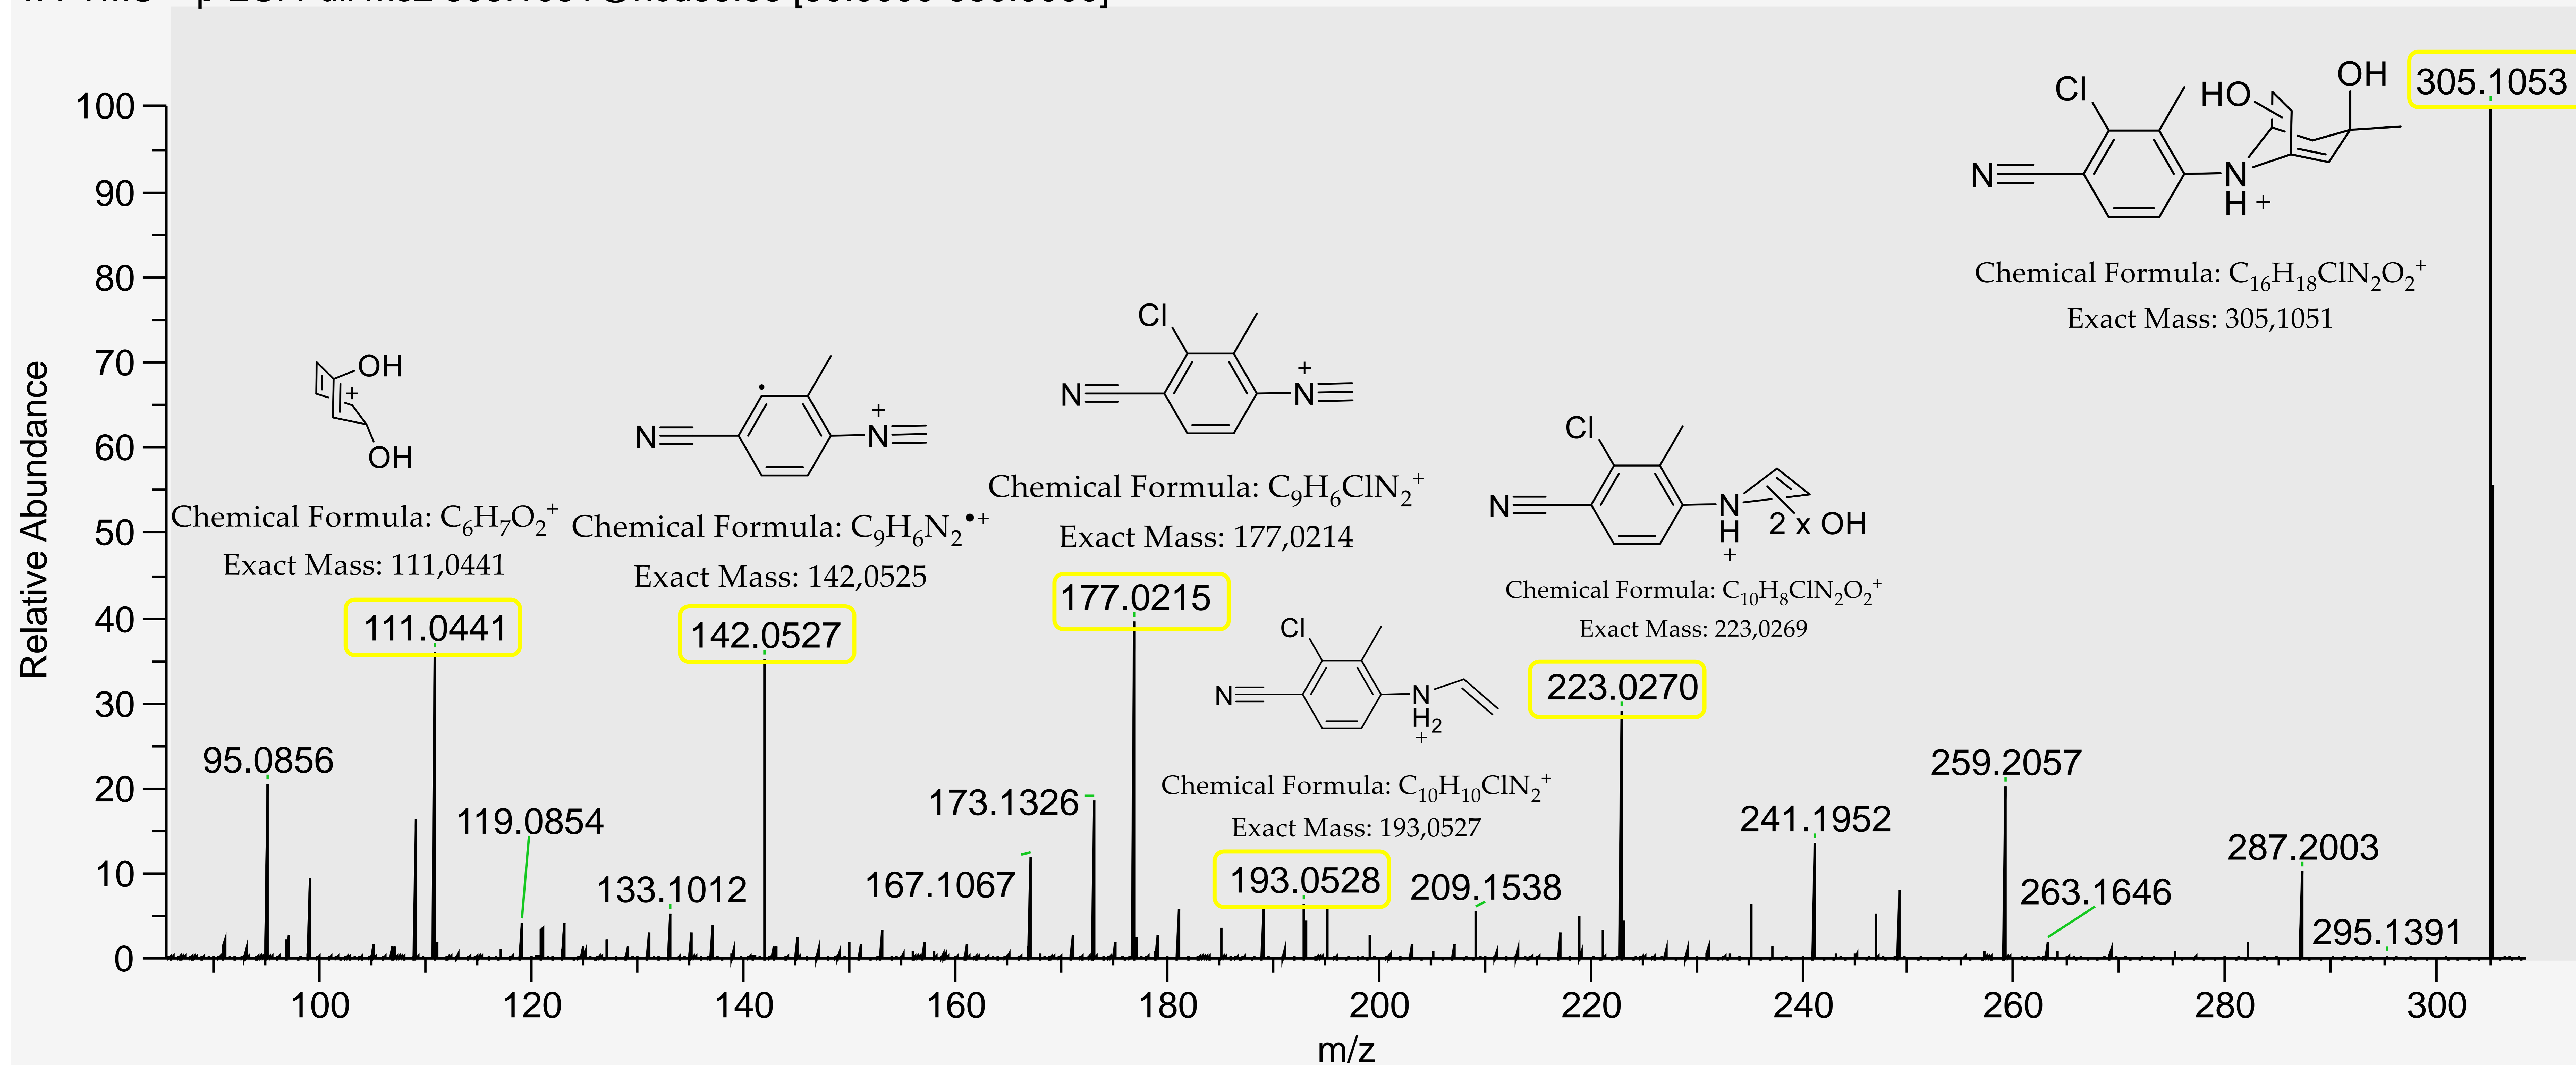



# M5a

Dihydroxylation + loss of 2H

Retention time: 9.17 min

m/z: 321.1005

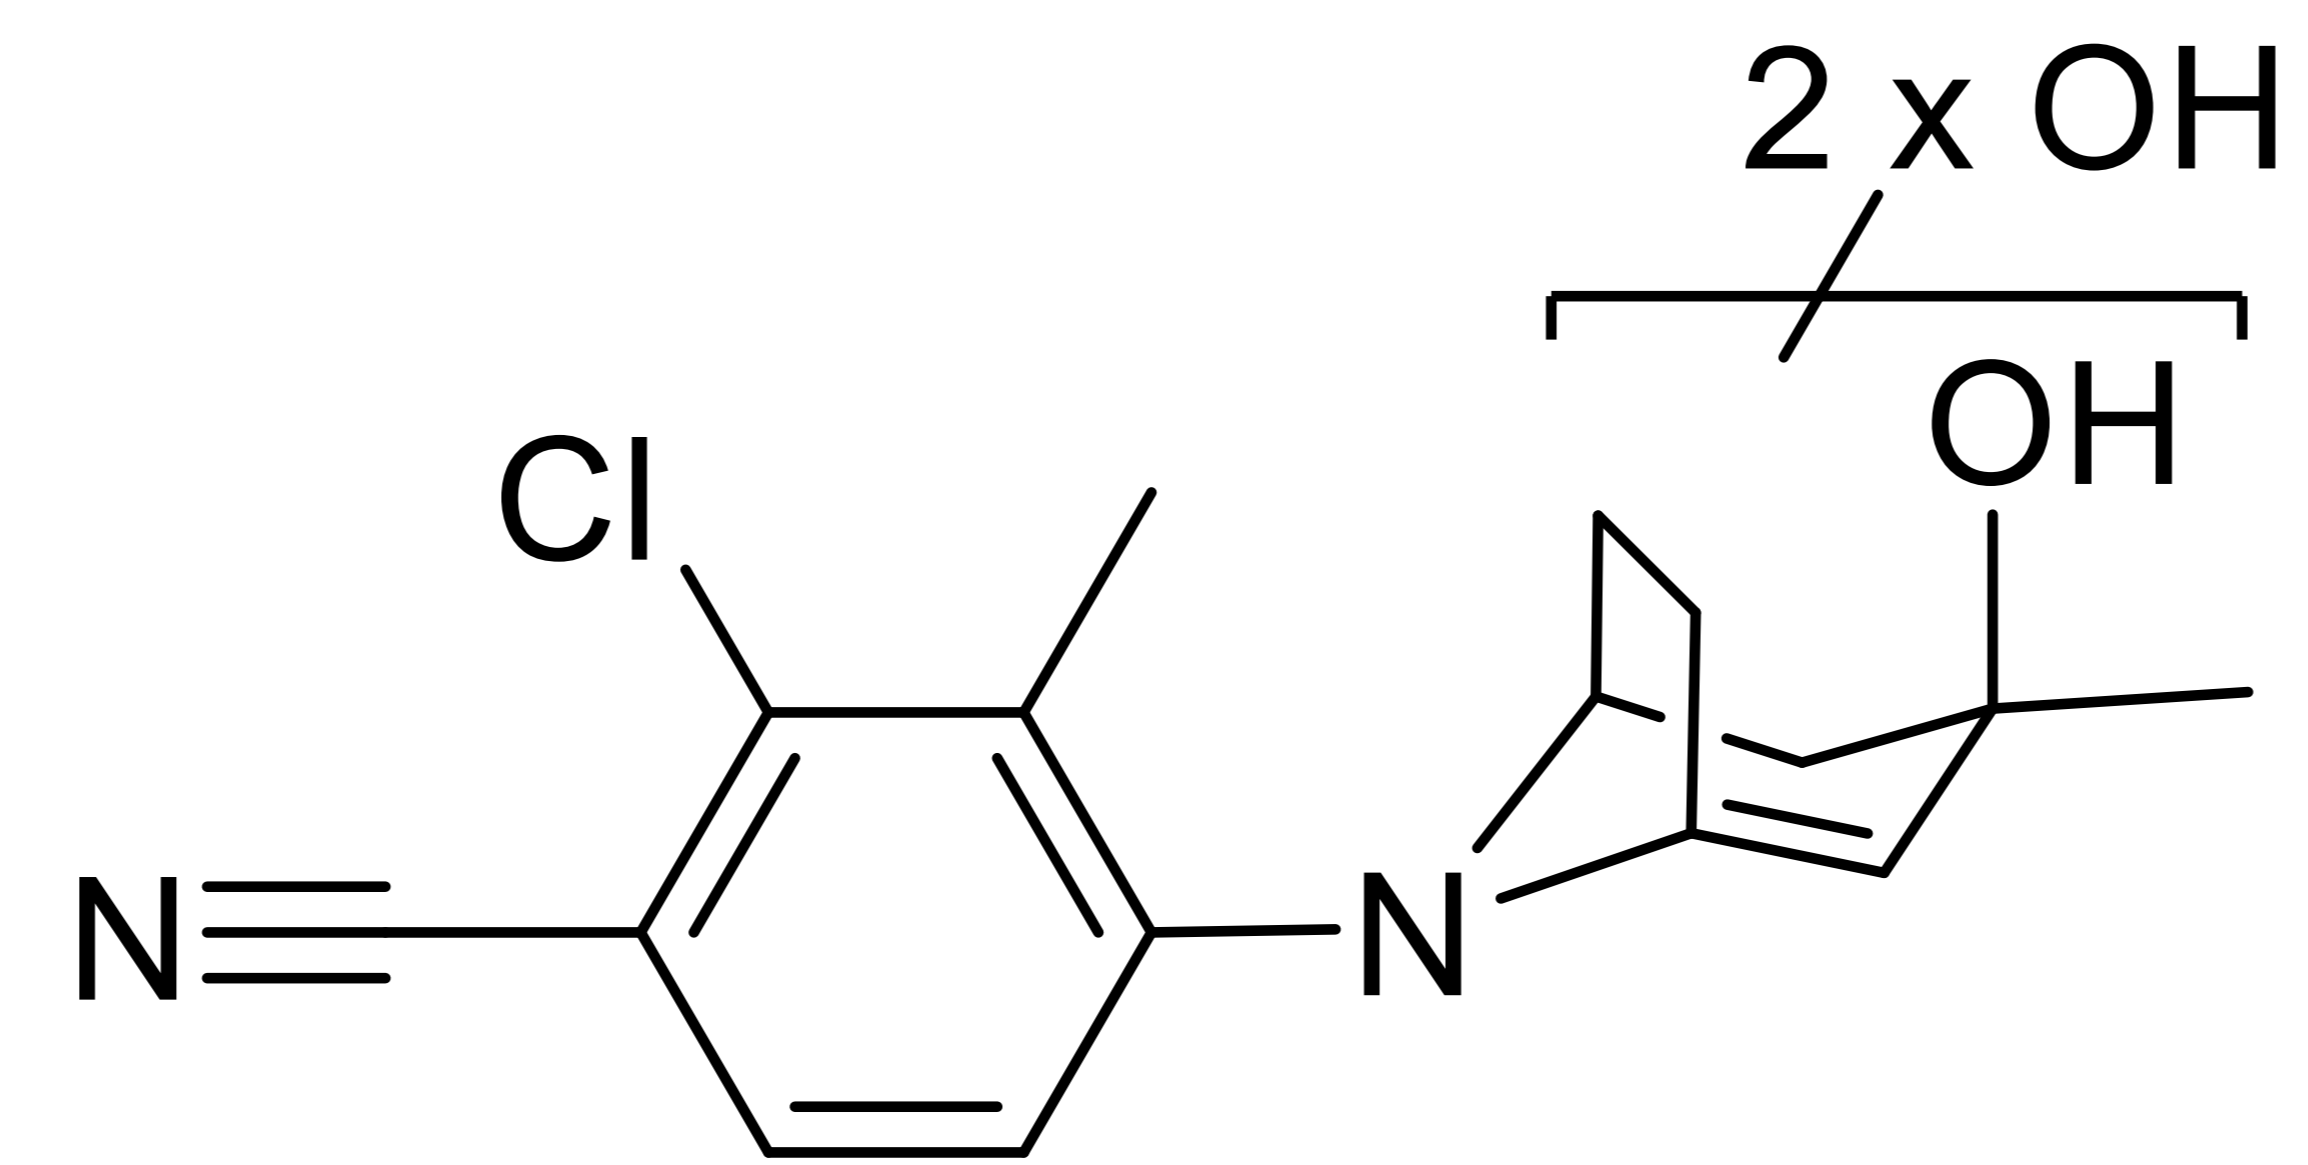

MNB\_20200730\_011 #1922-1933 RT: 9.15-9.2 AV: 12 SB: 78 9.00-9.15 , 9.20-9.39 NL: 1.61E+005  
T: FTMS + p ESI Full ms2 321.1000@hcd38.33 [50.0000-345.0000]

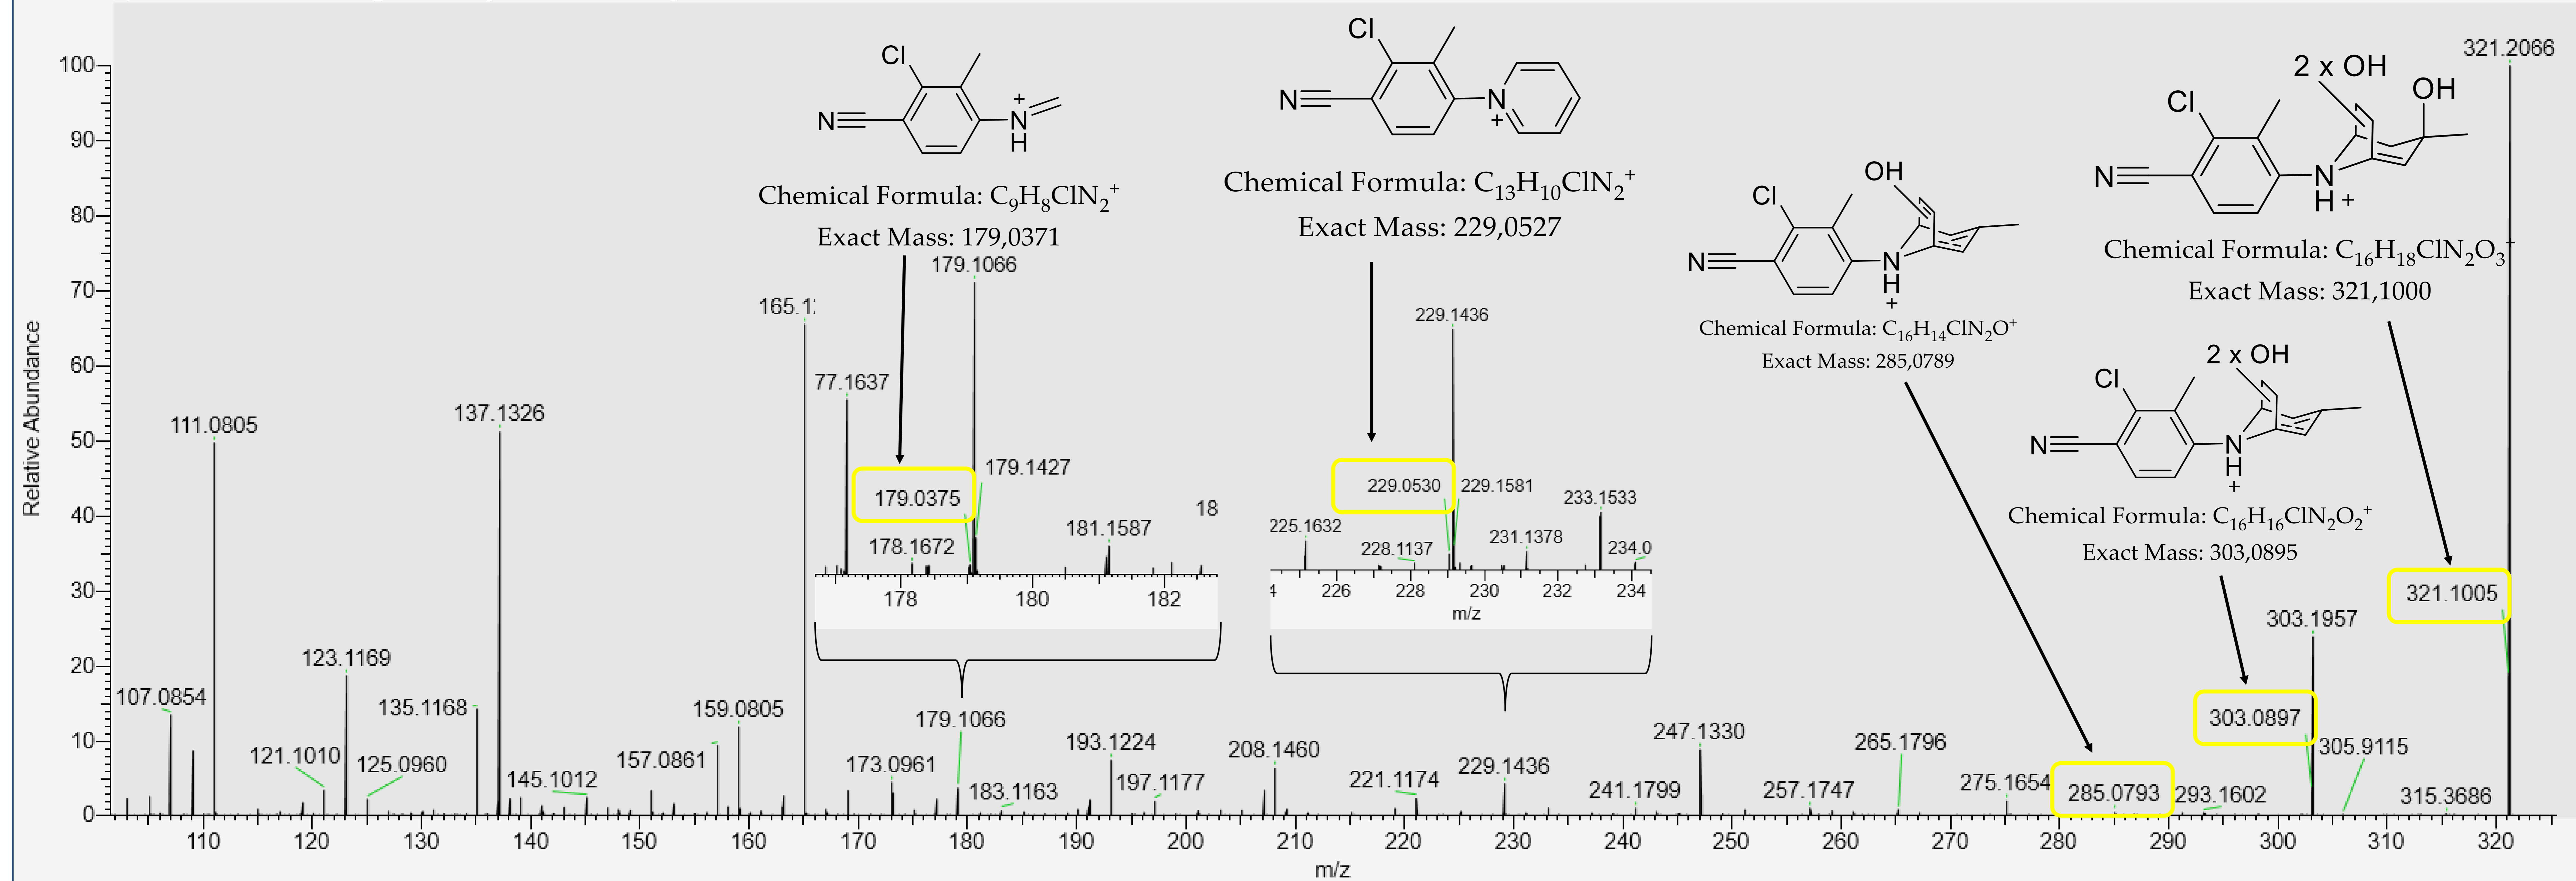



# M5b

Dihydroxylation + loss of 2H

Retention time: 9.57 min

m/z: 321.1003

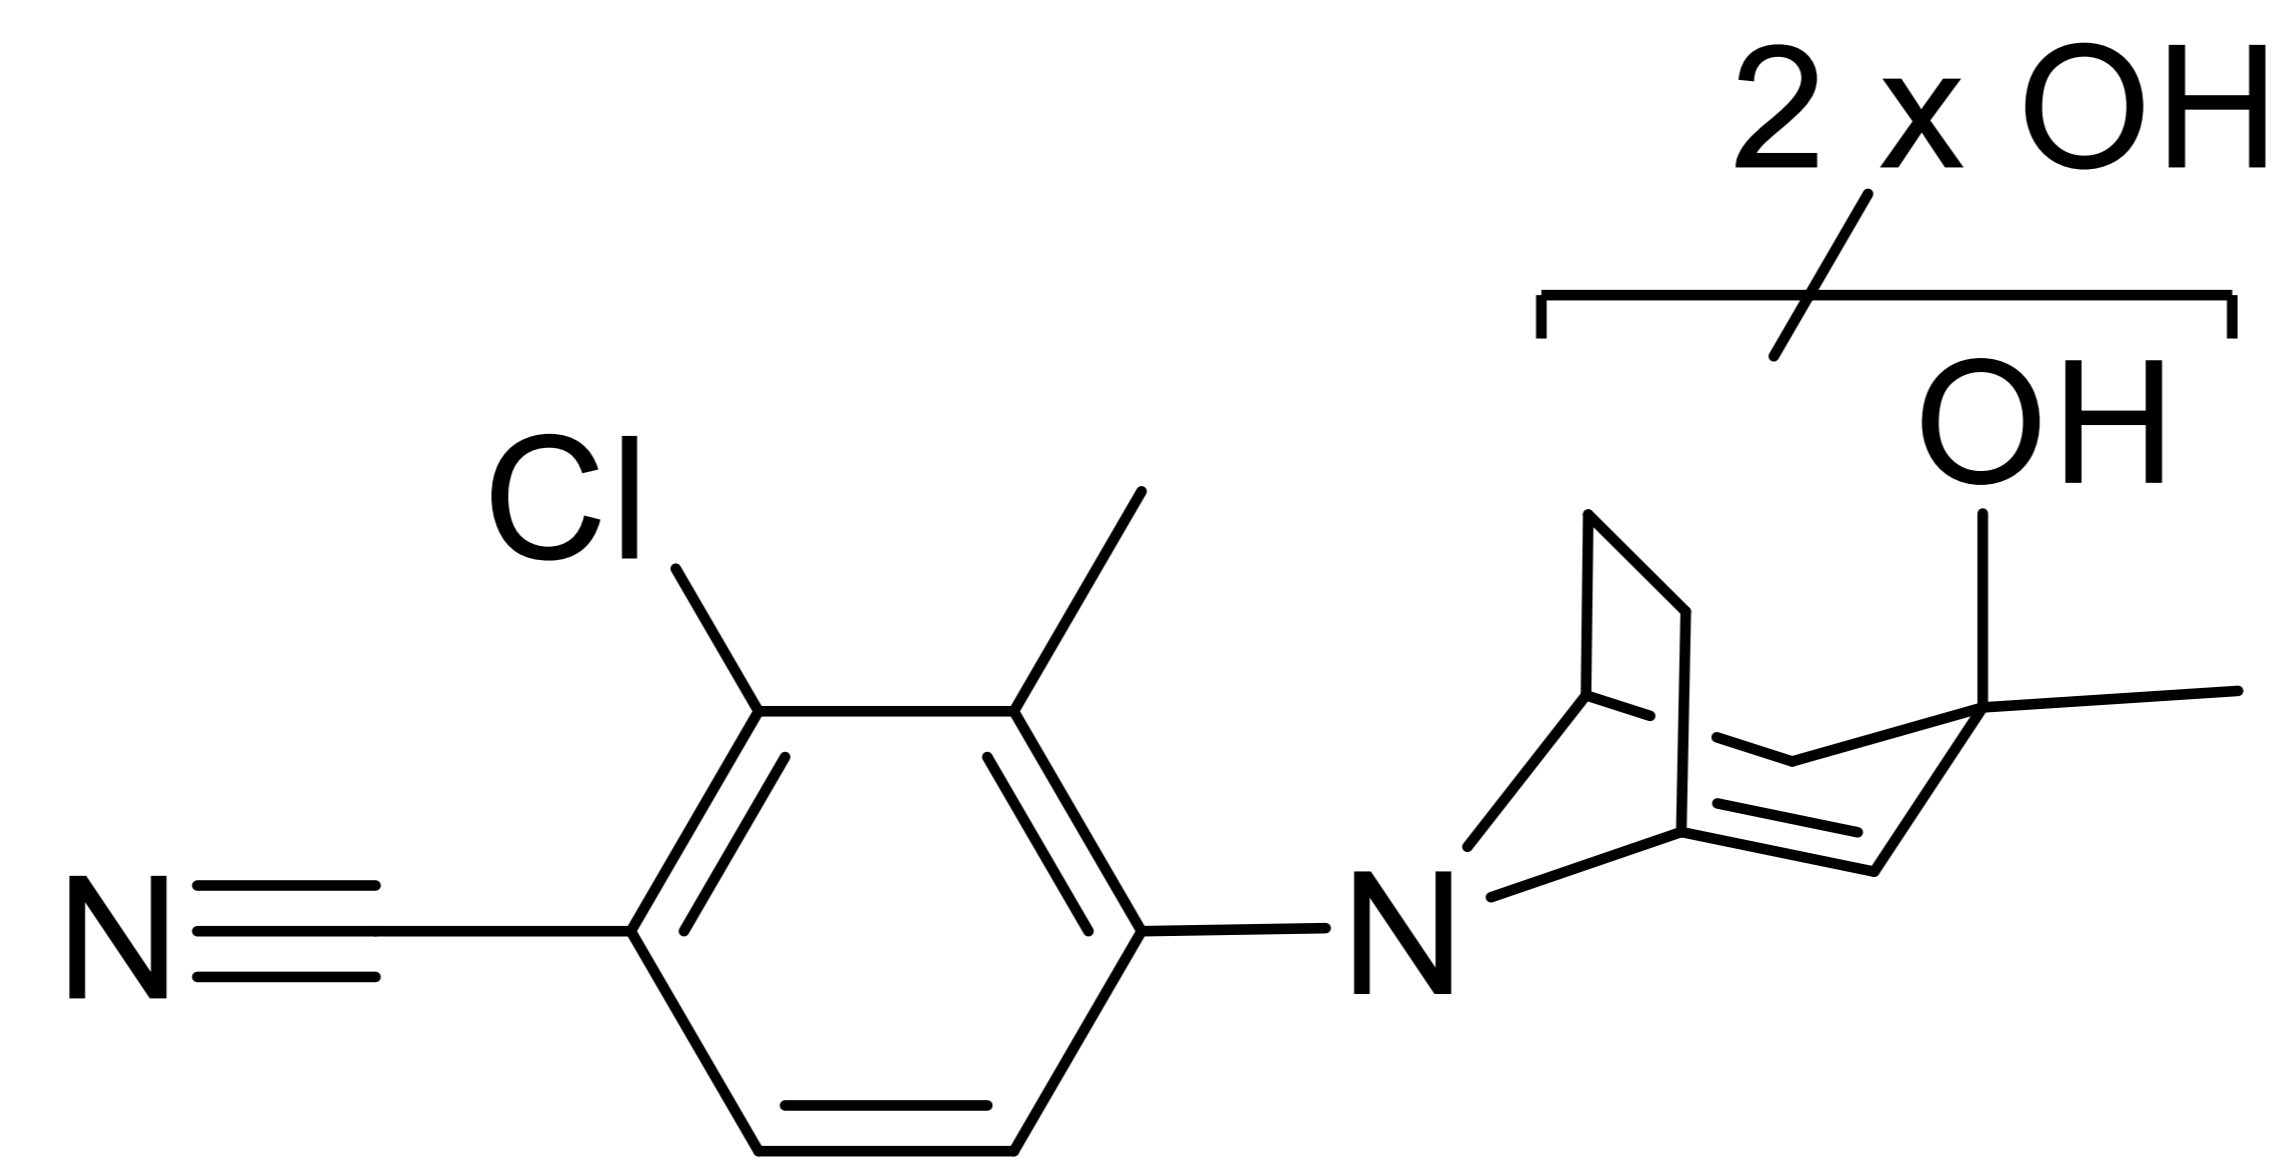

MNB\_20200730\_011 #2010-2030 RT: 9.54-9.63 AV: 21 SB: 34 9.47-9.54 , 9.63-9.70 NL: 1.27E+006  
T: FTMS + p ESI Full ms2 321.1000@hcd38.33 [50.0000-345.0000]

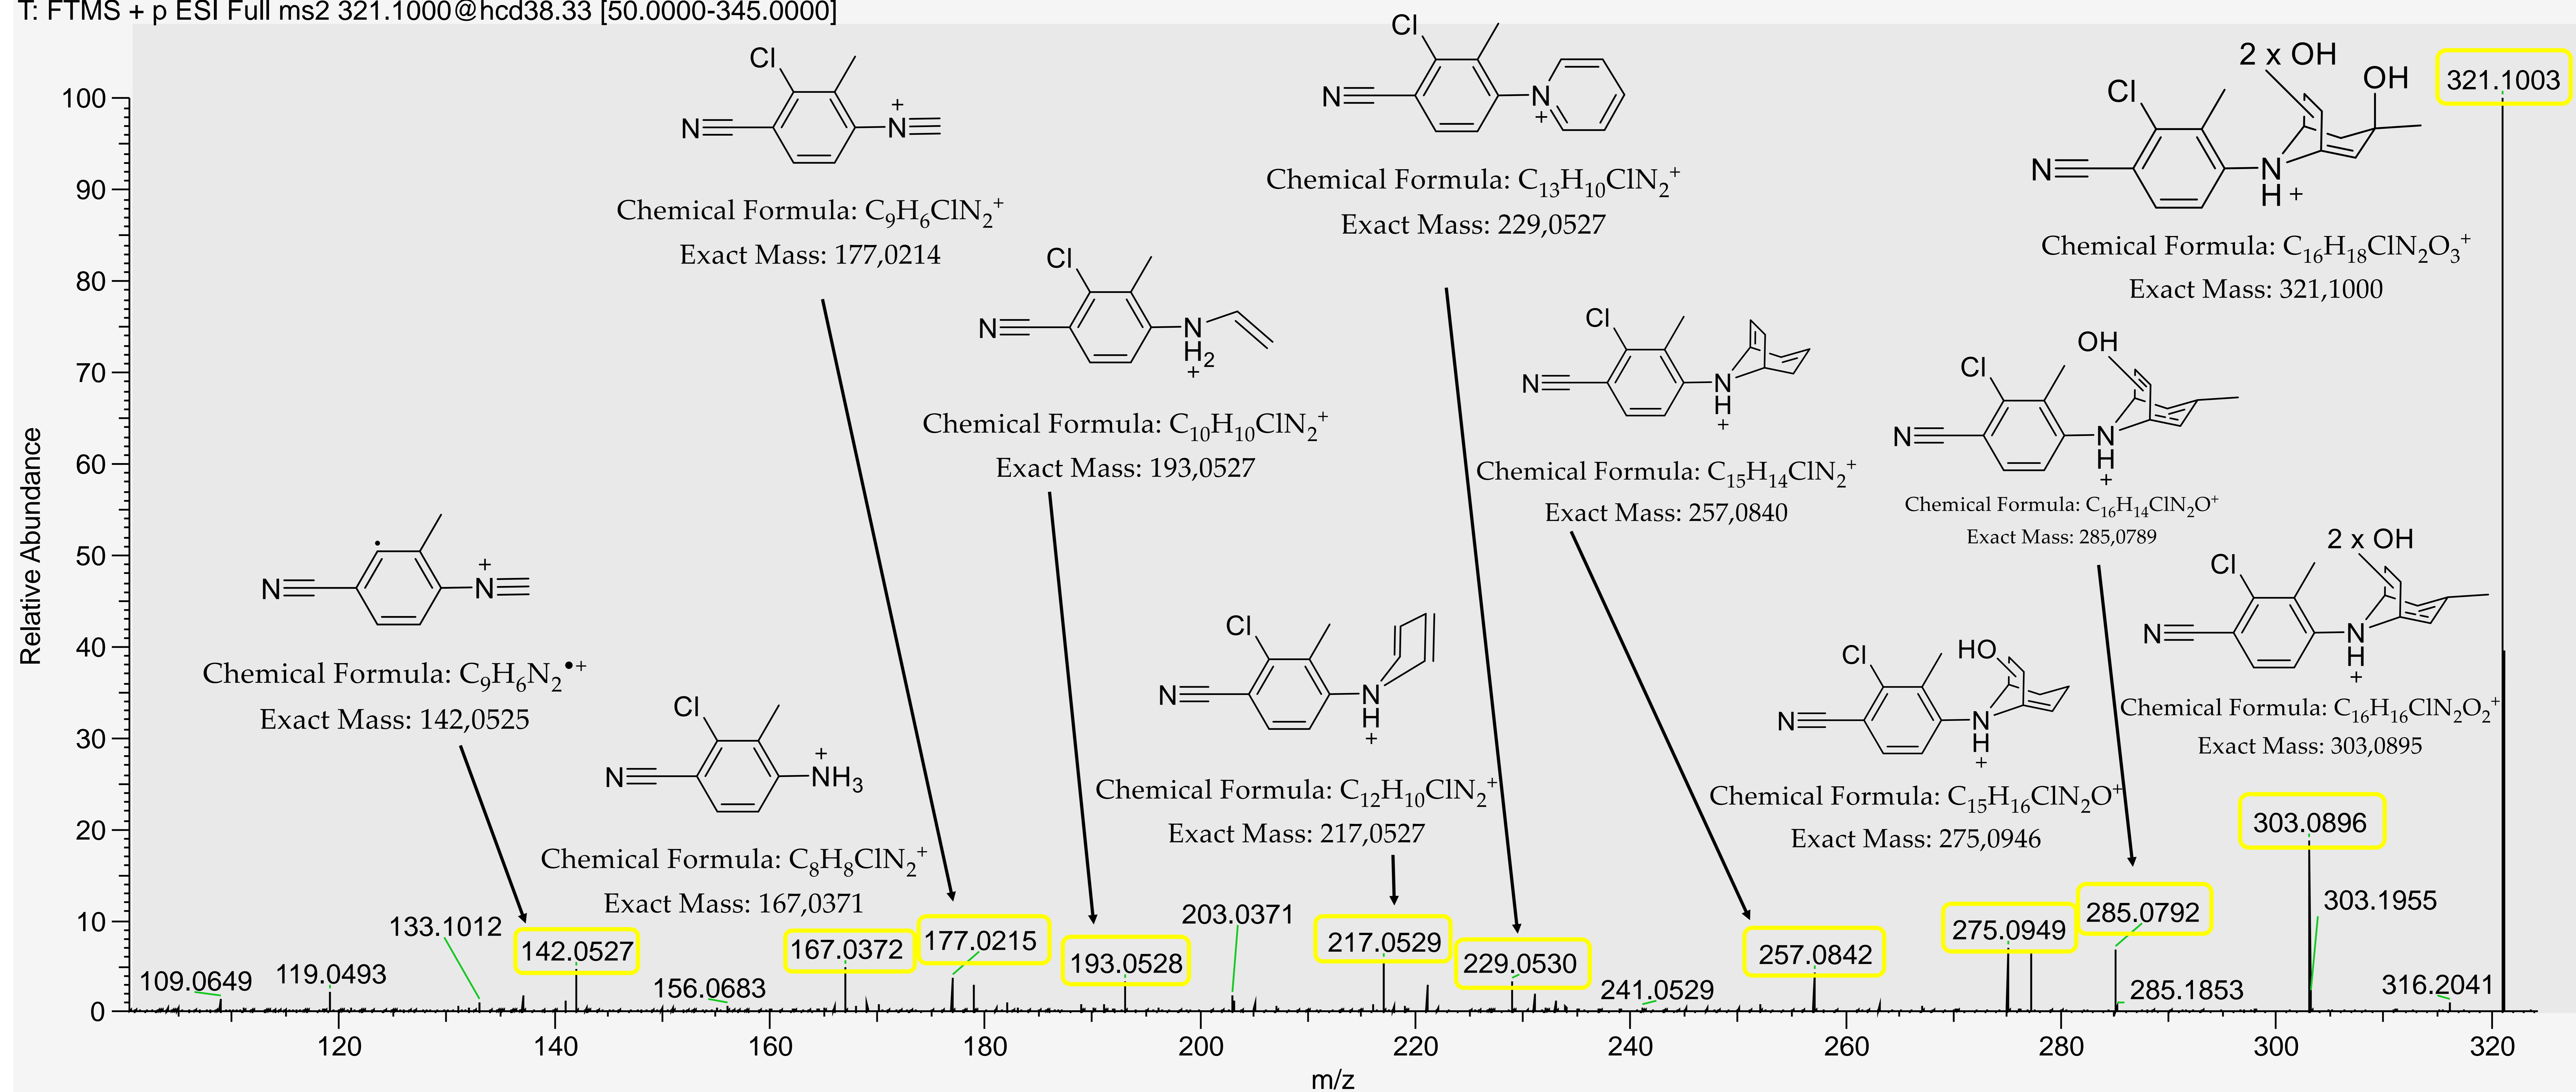



# M6a

Trihydroxylation + loss of 2H

Retention time: 7.21 min

m/z: 337.0953

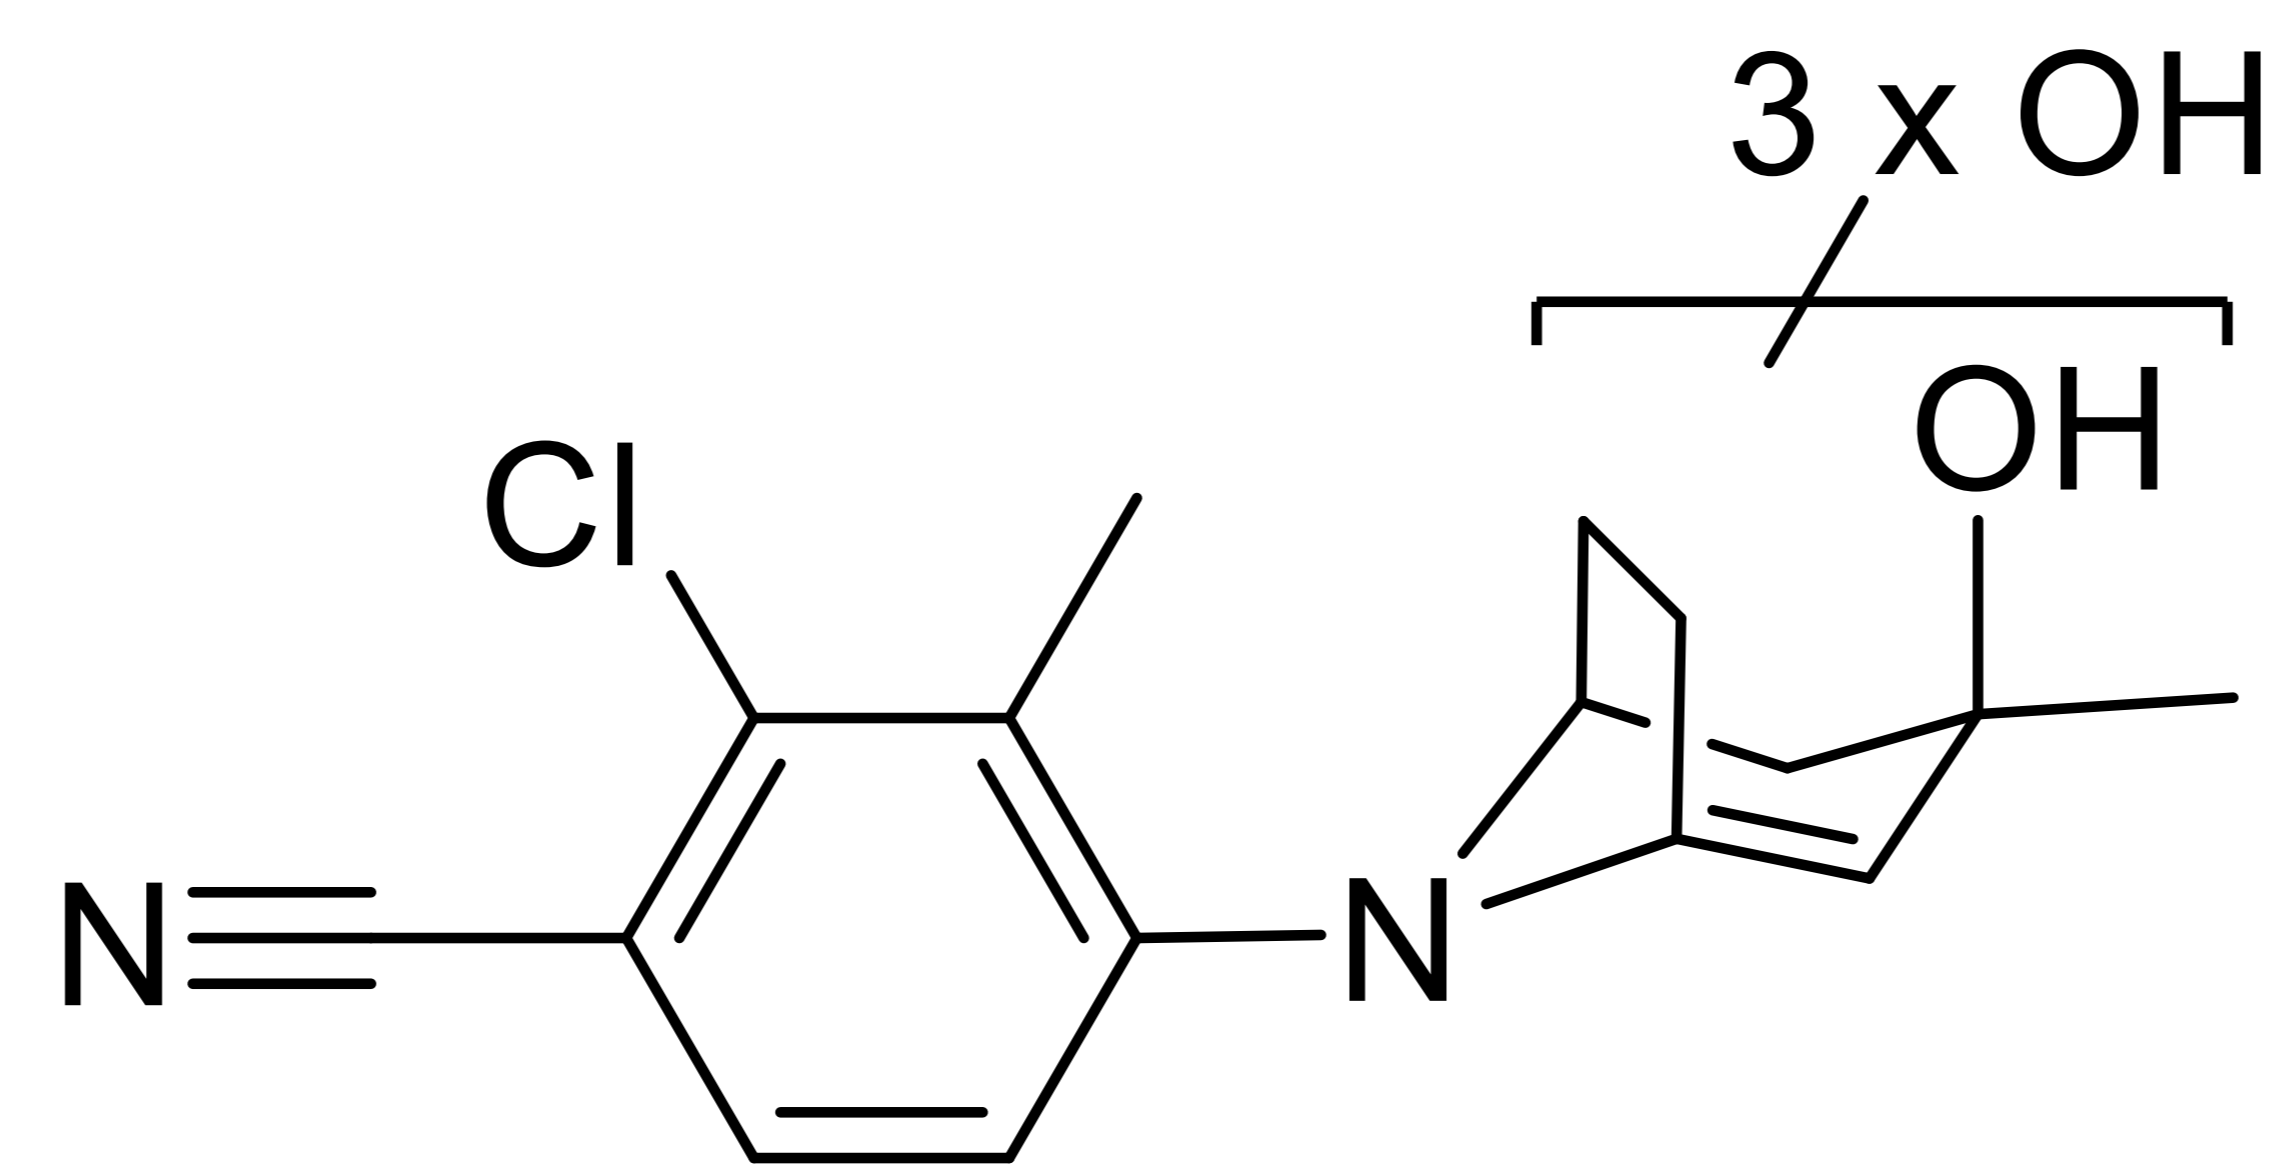

MNB\_20200730\_010 #1486-1503 RT: 7.18-7.26 AV: 18 SB: 20 7.14-7.18 , 7.26-7.30 NL: 2.21E+005  
T: FTMS + p ESI Full ms2 337.0950@hcd38.33 [50.0000-360.0000]

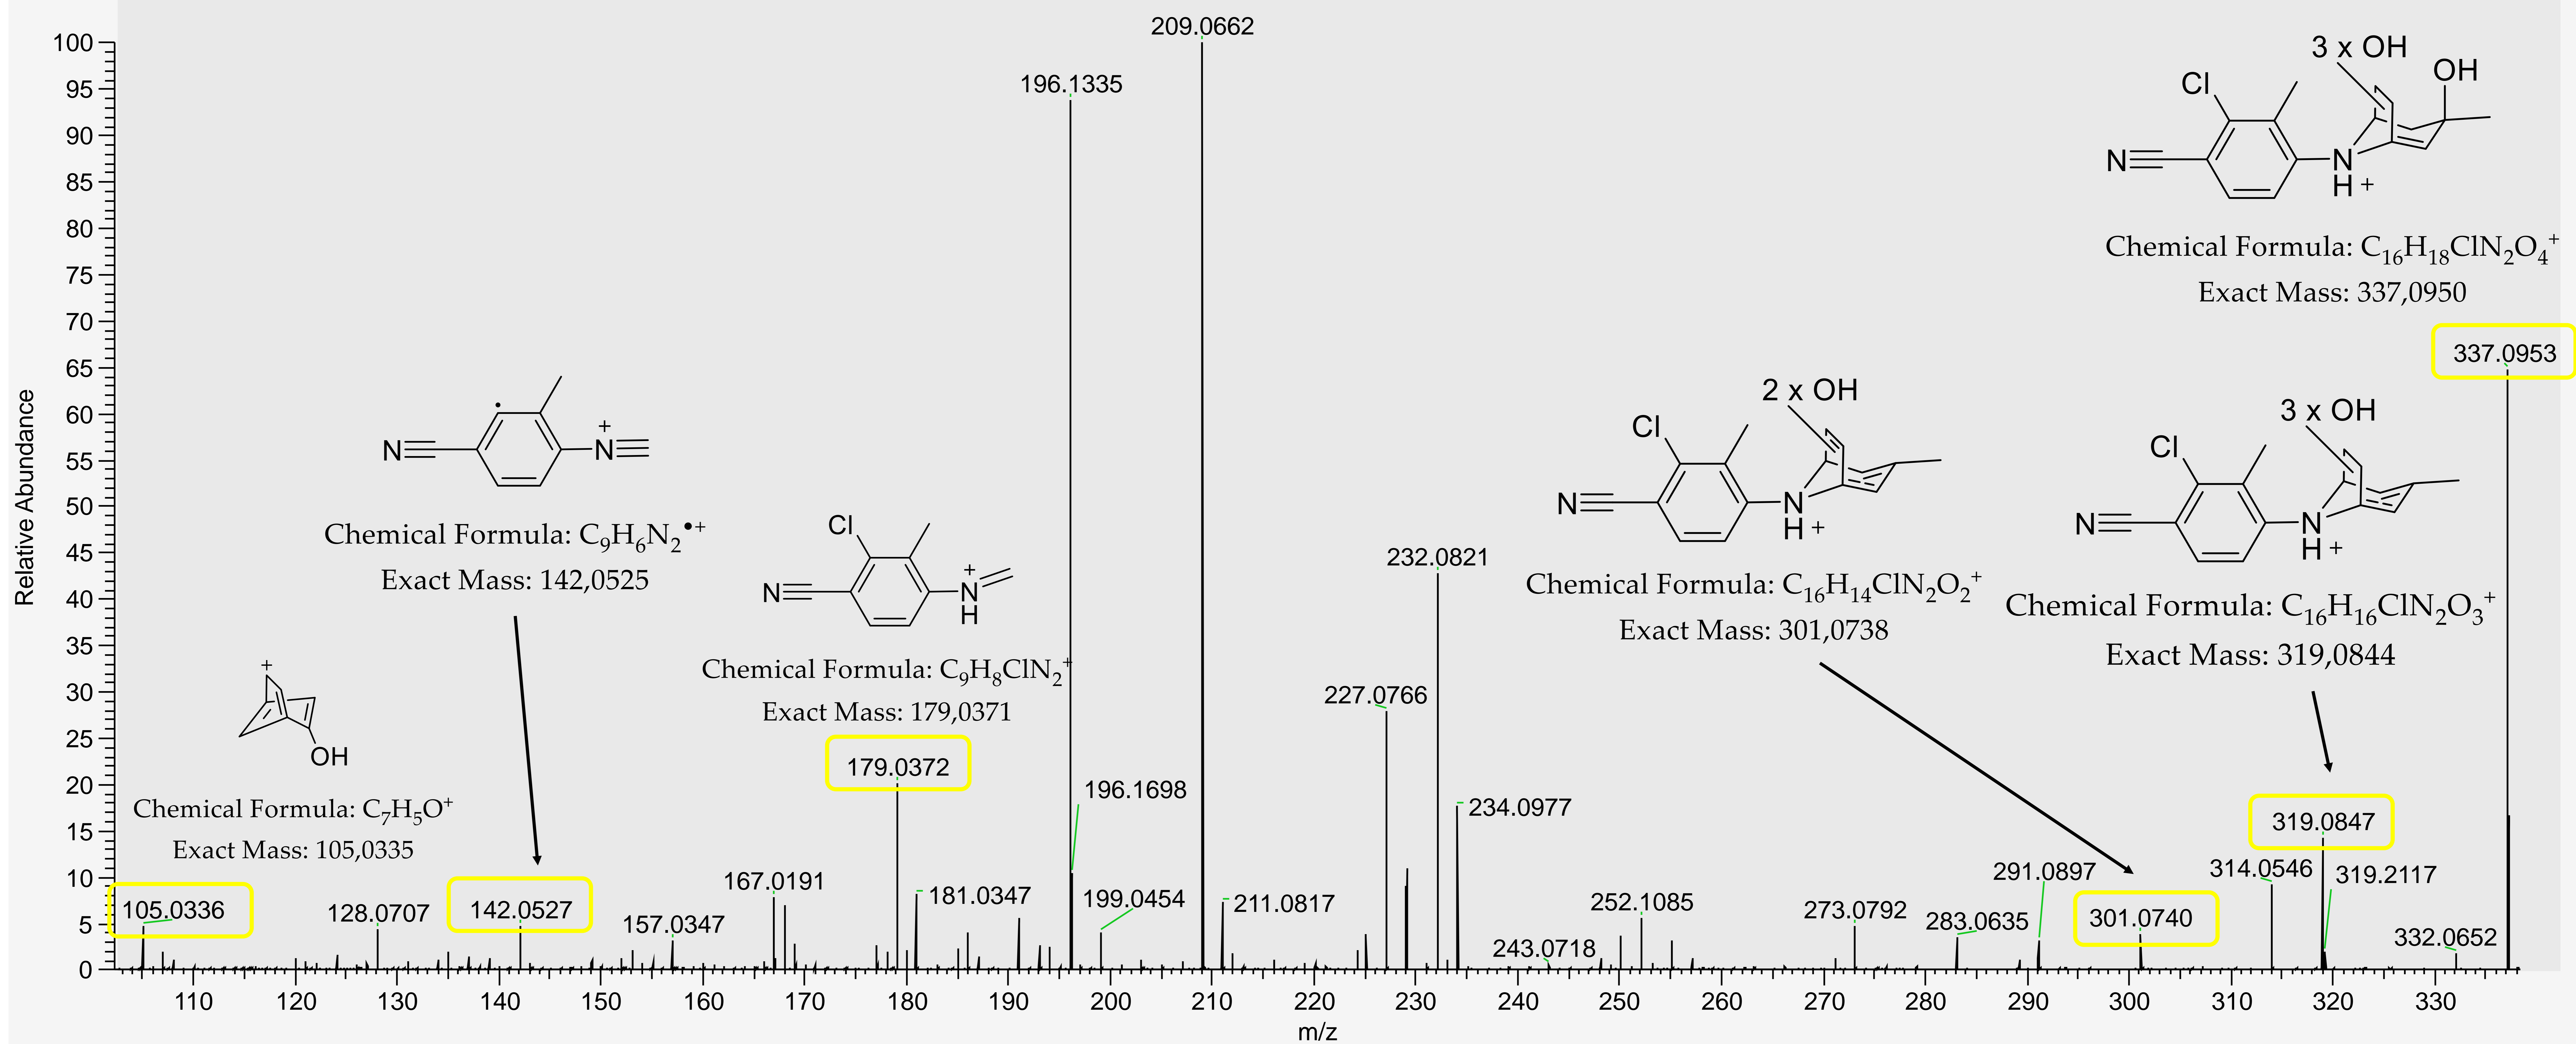



# M6b

Trihydroxylation + loss of 2H

Retention time: 7.47 min

m/z: 337.0951

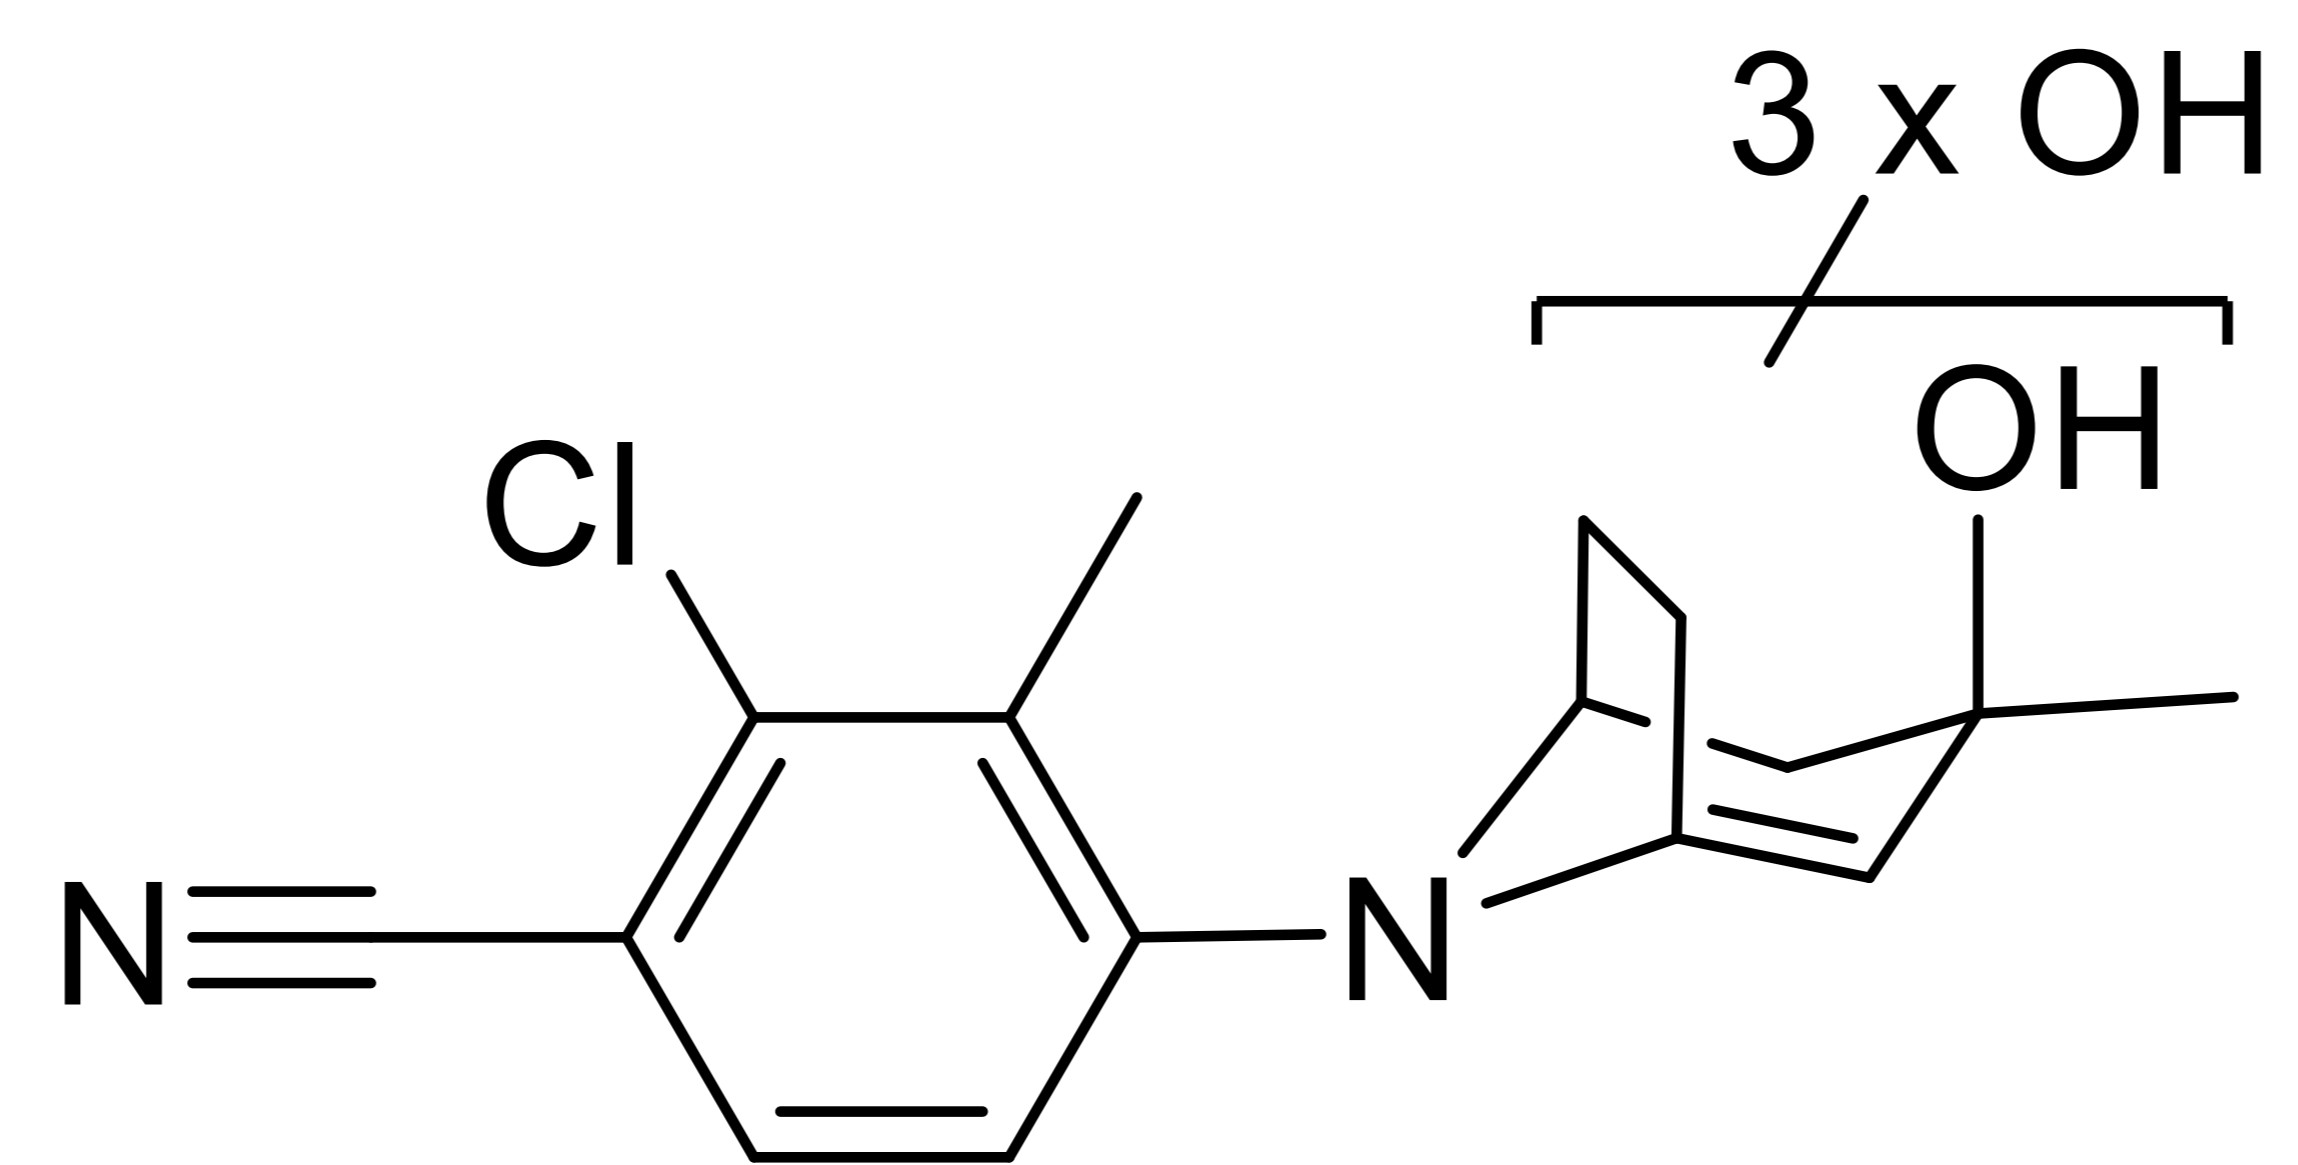

MNB\_20200730\_010 #1548-1562 RT: 7.46-7.52 AV: 15 SB: 17 7.42-7.45 , 7.52-7.56 NL: 8.85E+005  
T: FTMS + p ESI Full ms2 337.0950@hcd38.33 [50.0000-360.0000]

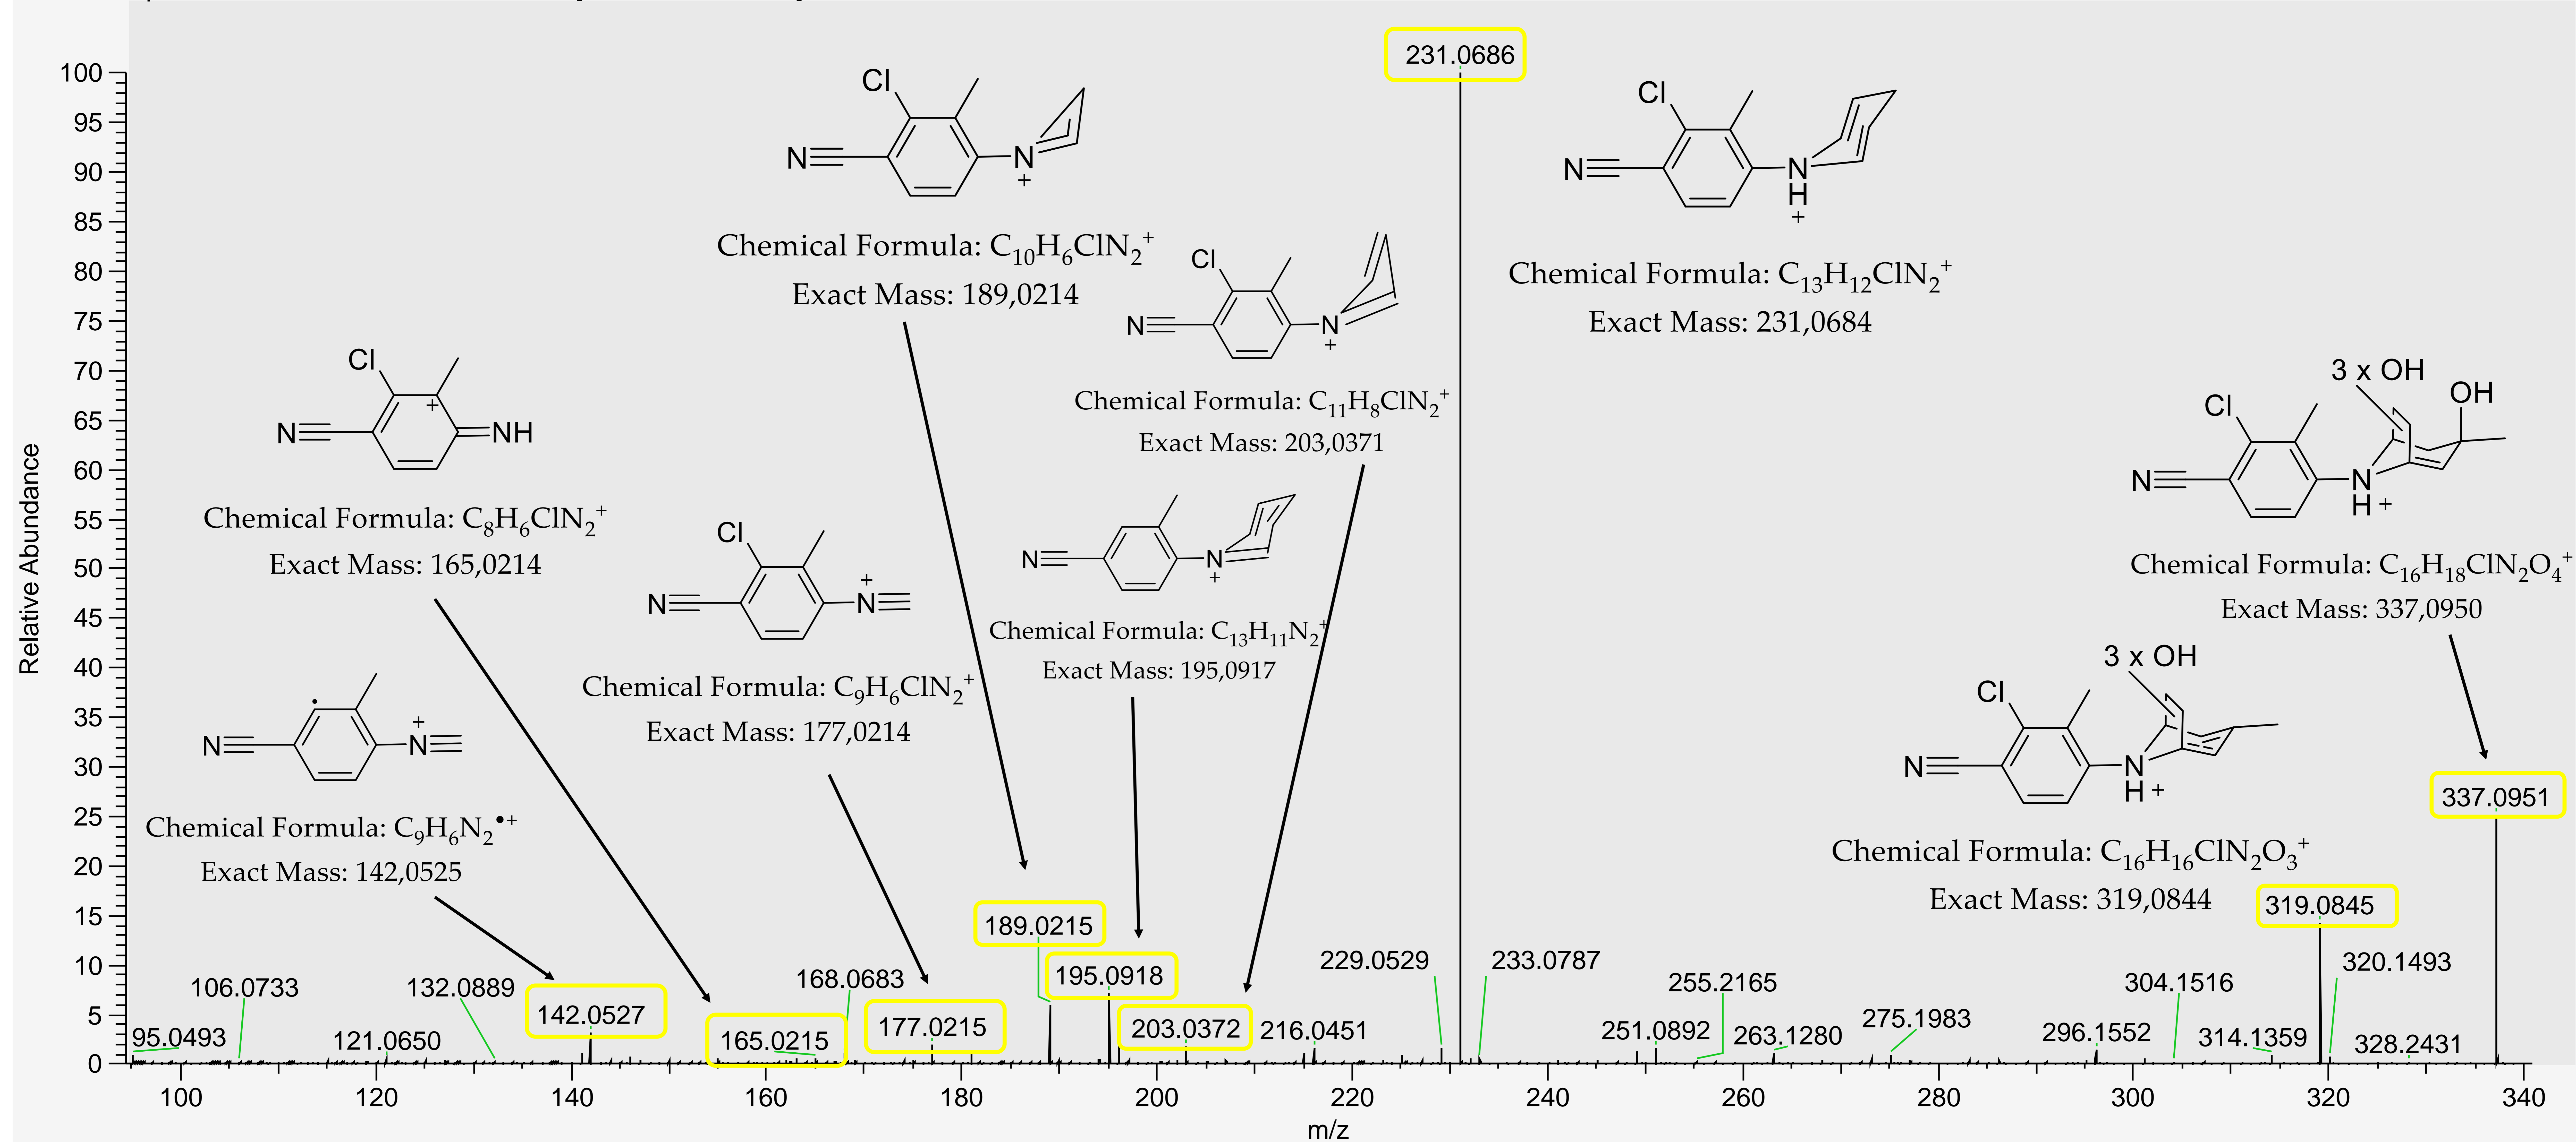



# M6c

Trihydroxylation + loss of 2H

Retention time: 9.04 min

m/z: 337.0955

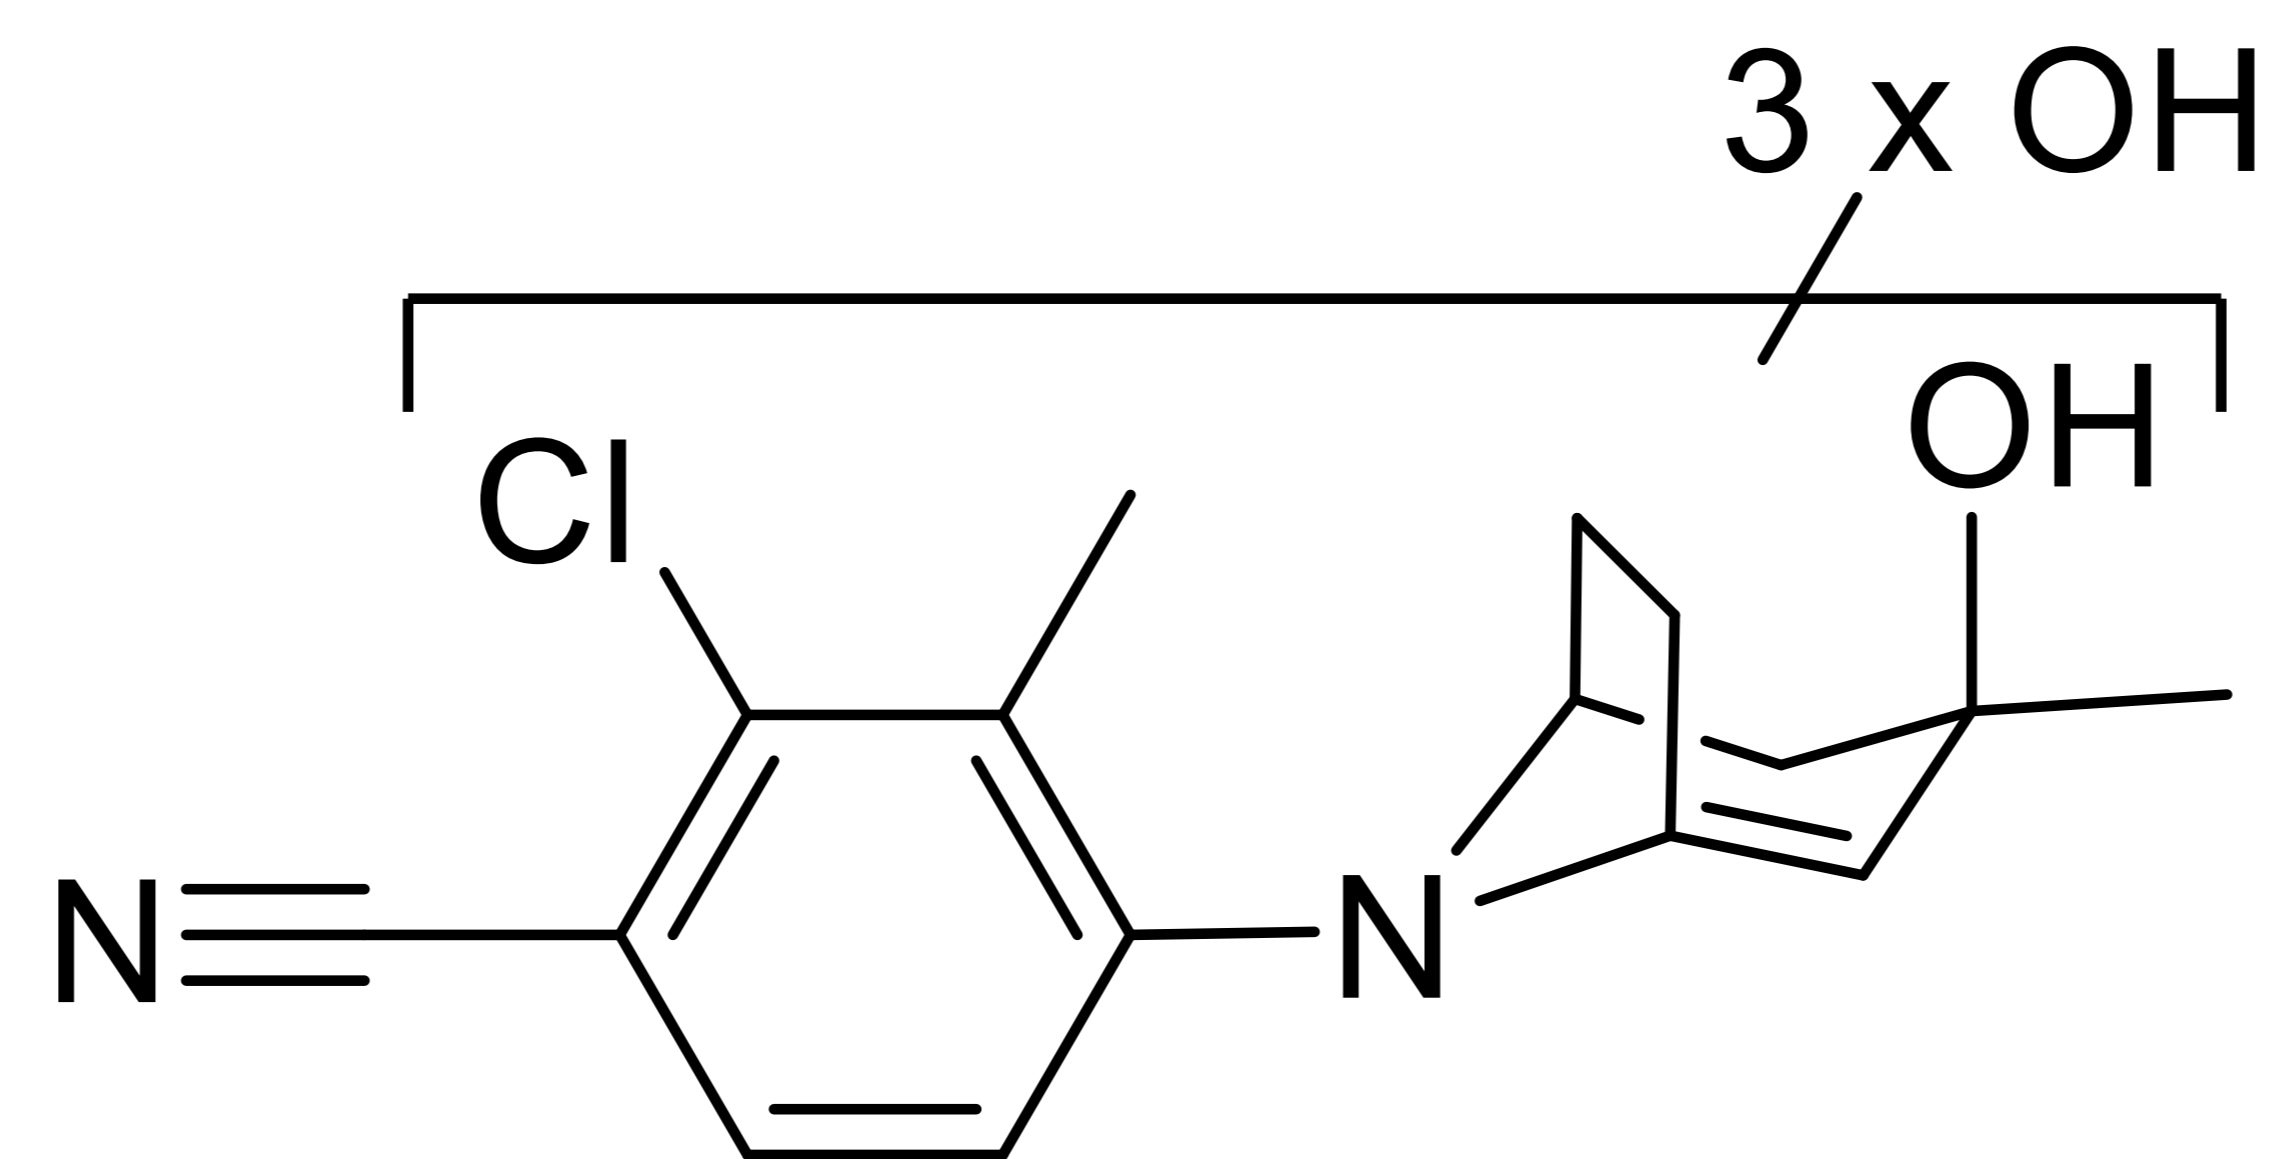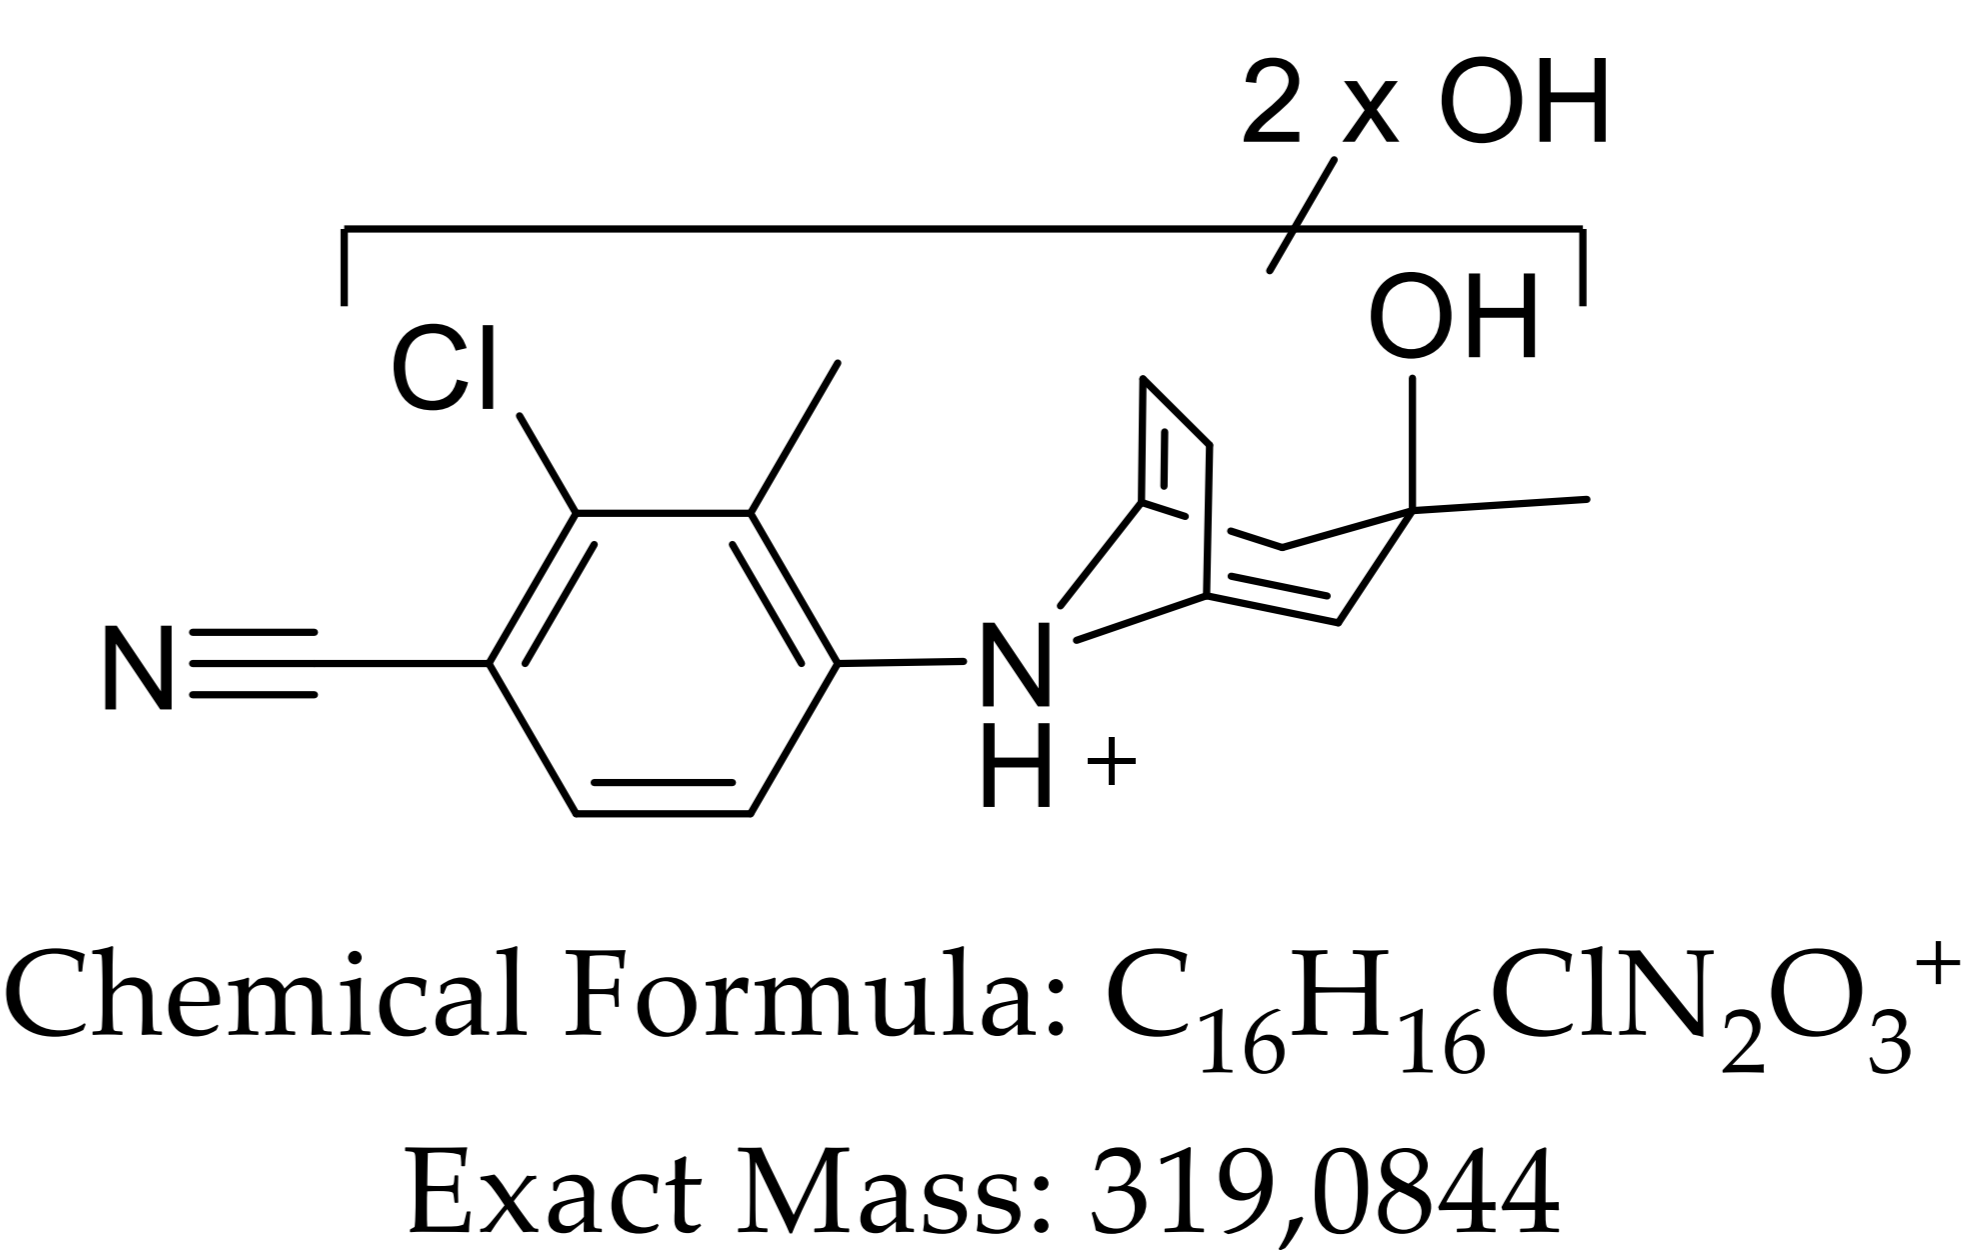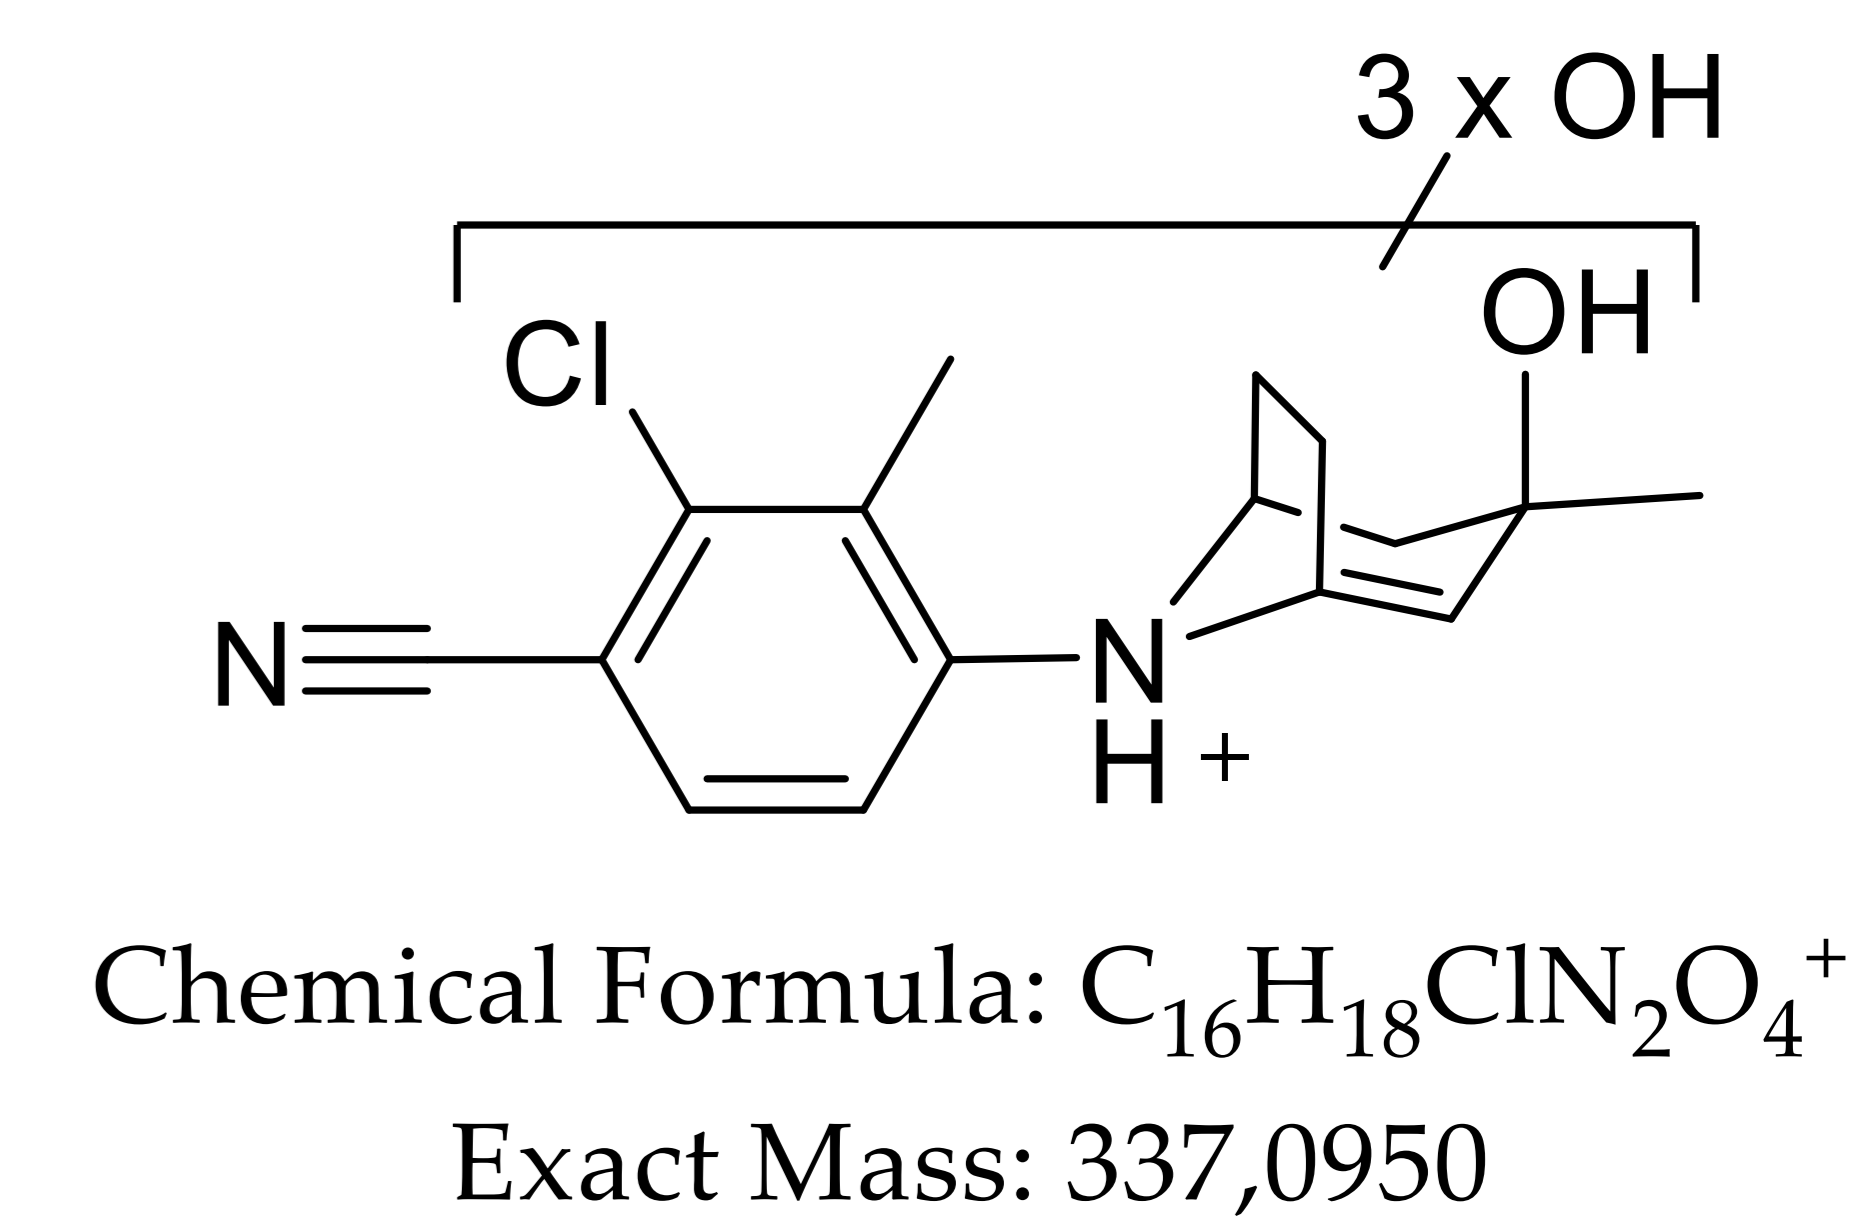

MNB\_20200730\_010 #1896-1910 RT: 9.03-9.09 AV: 15 SB: 14 9.00-9.03 , 9.09-9.12 NL: 1.48E+005  
T: FTMS + p ESI Full ms2 337.0950@hcd38.33 [50.0000-360.0000]

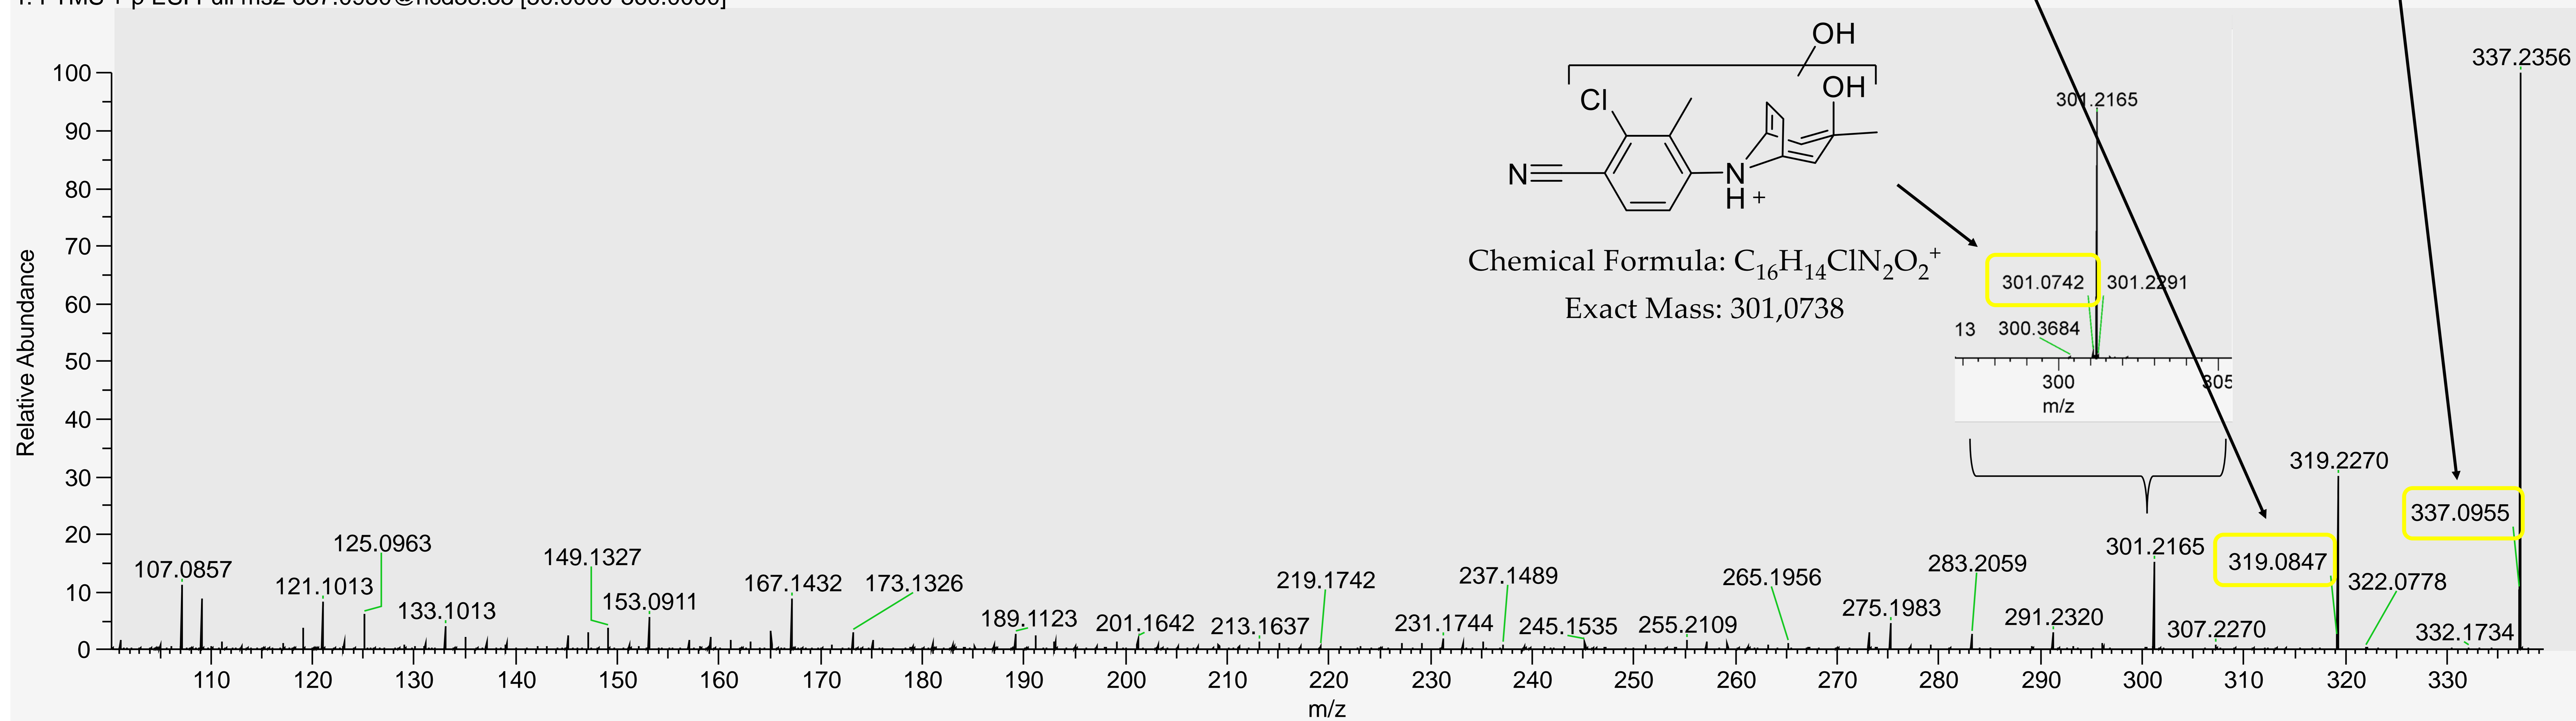



# M7

## Glucuronidation

Retention time: 8.95 min

m/z: 467.1580

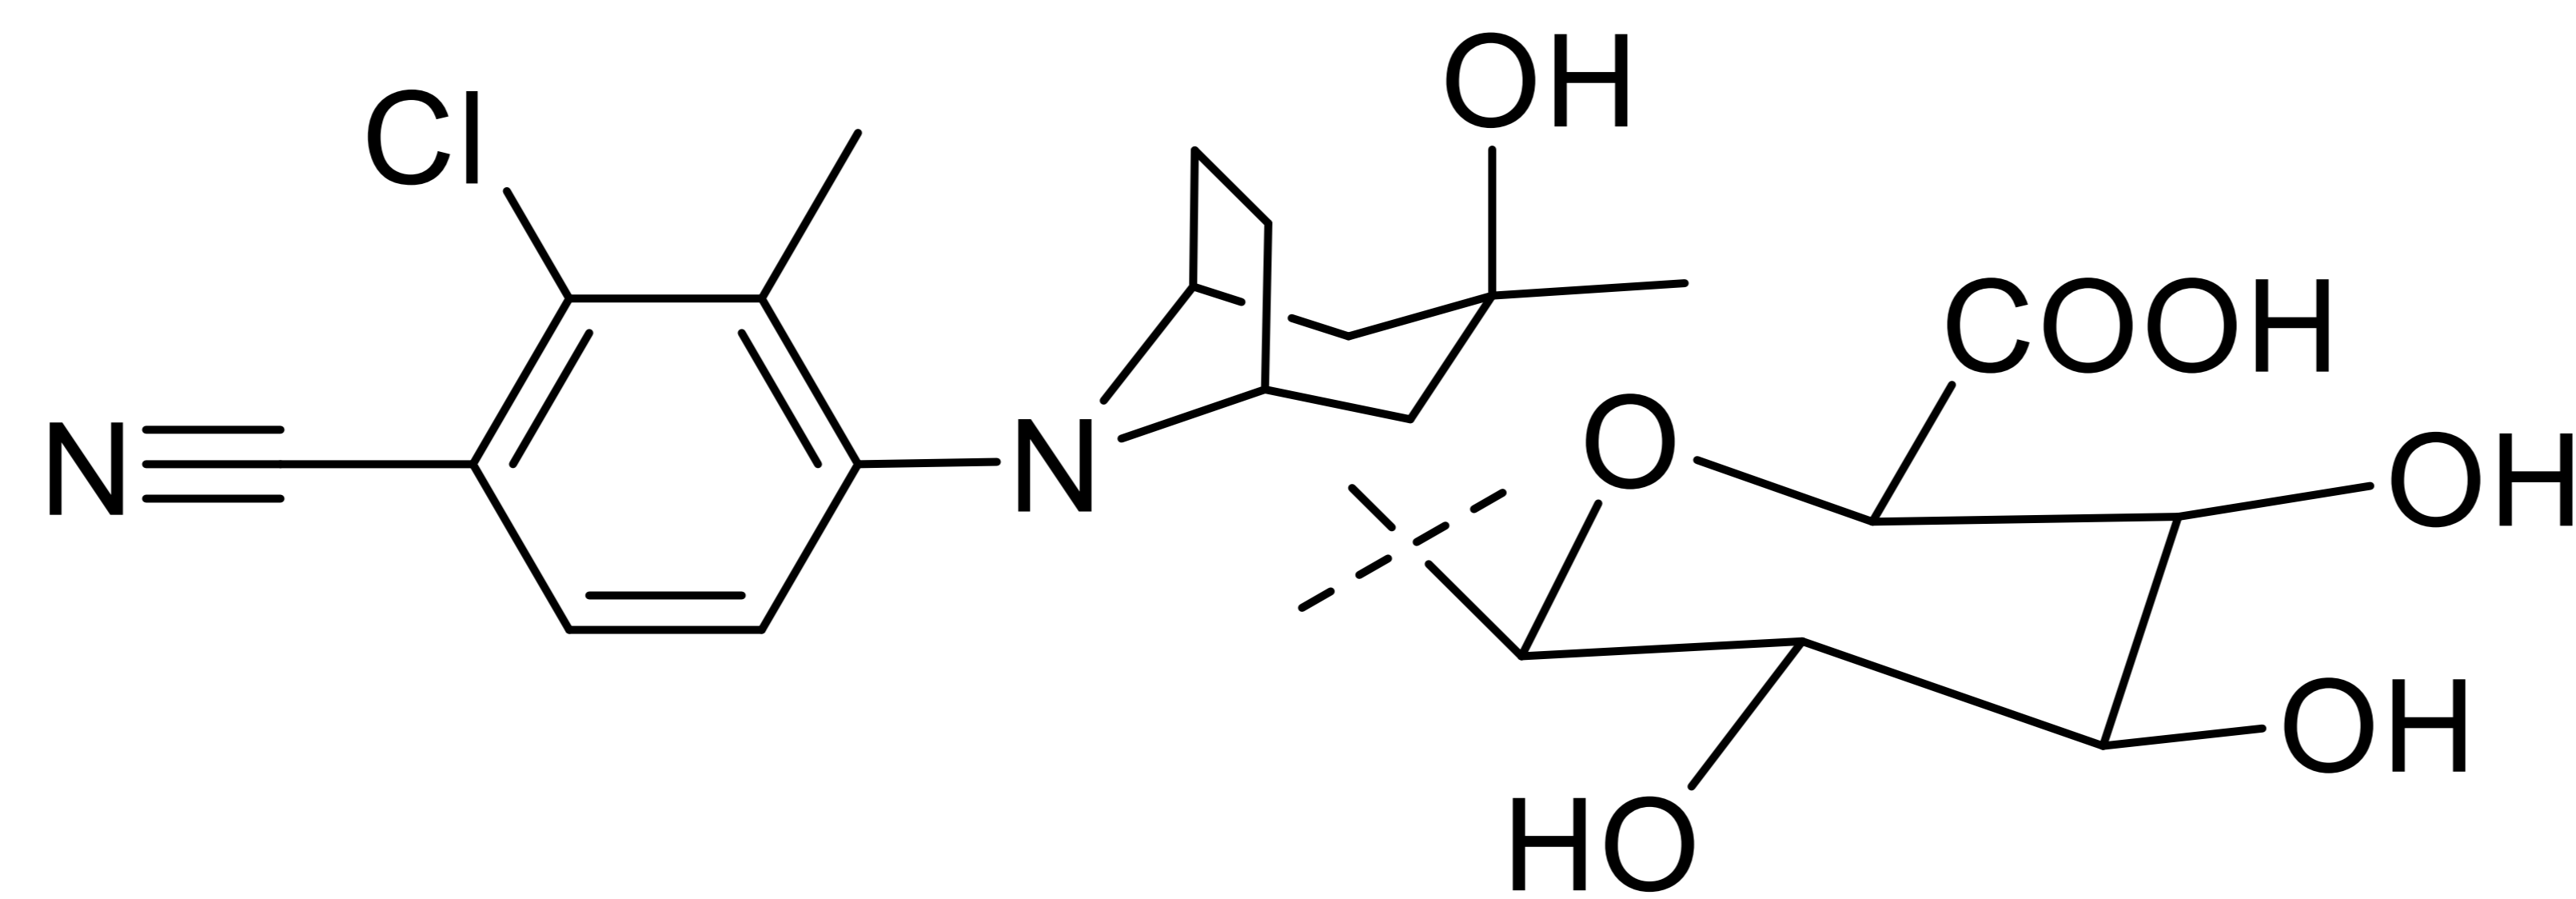

MNB\_20200429\_05 #1704-1713 RT: 8.93-8.99 AV: 4 SB: 7 8.88-8.93 , 8.99-9.03 NL: 2.73E+005  
T: FTMS + p ESI Full ms2 467.1580@hcd38.33 [50.0000-495.0000]

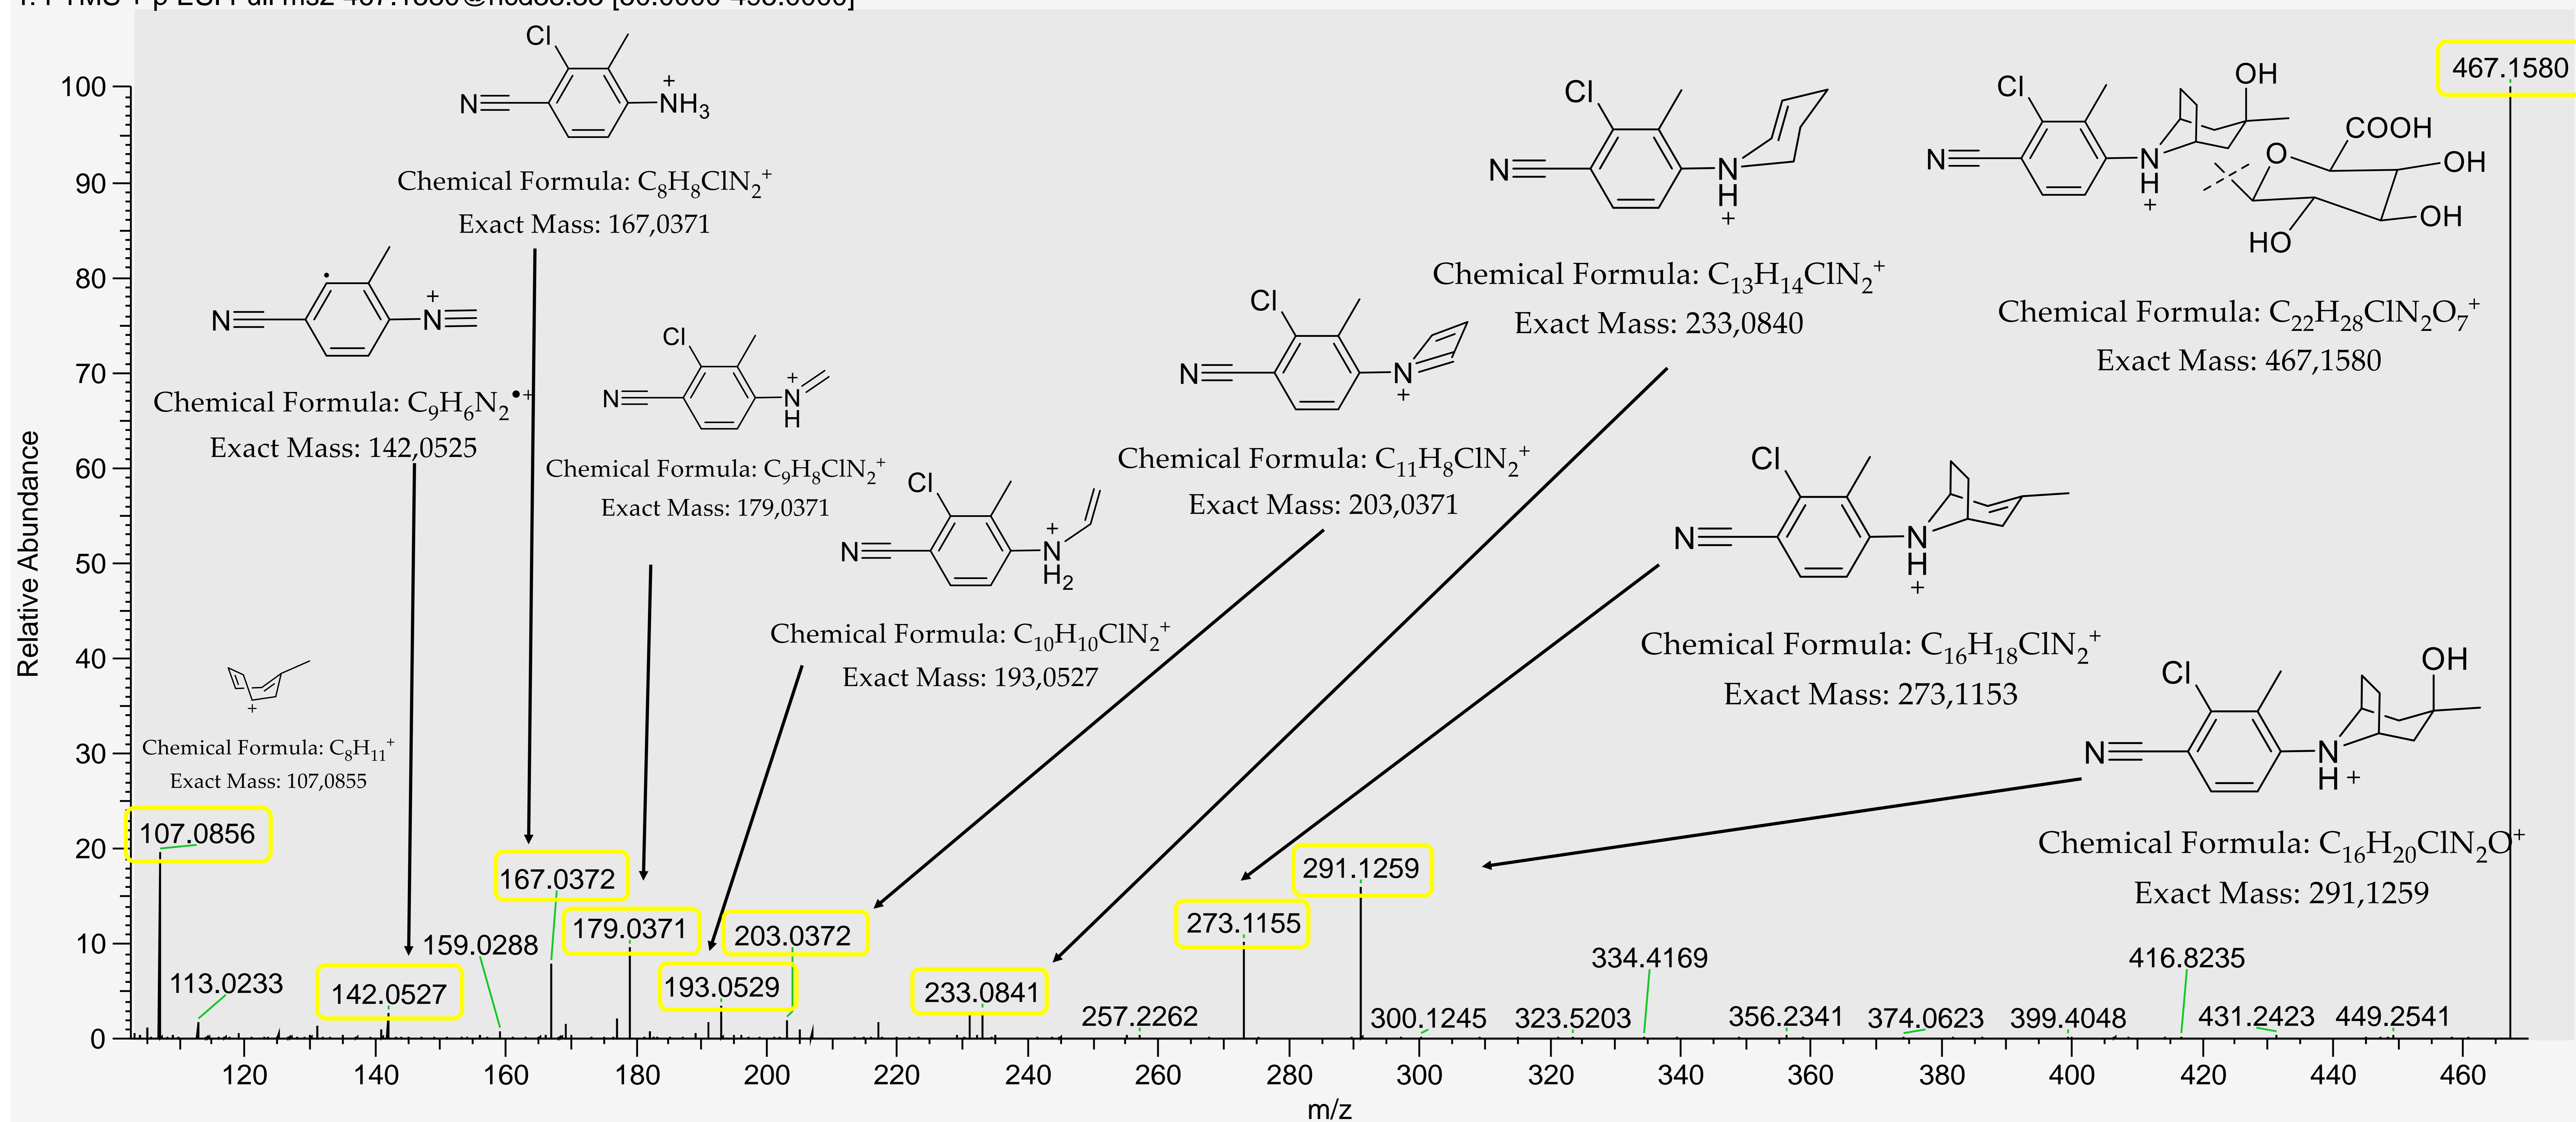



# M8a

Monohydroxylation + glucuronidation

Retention time: 7.13 min

m/z: 483.1531

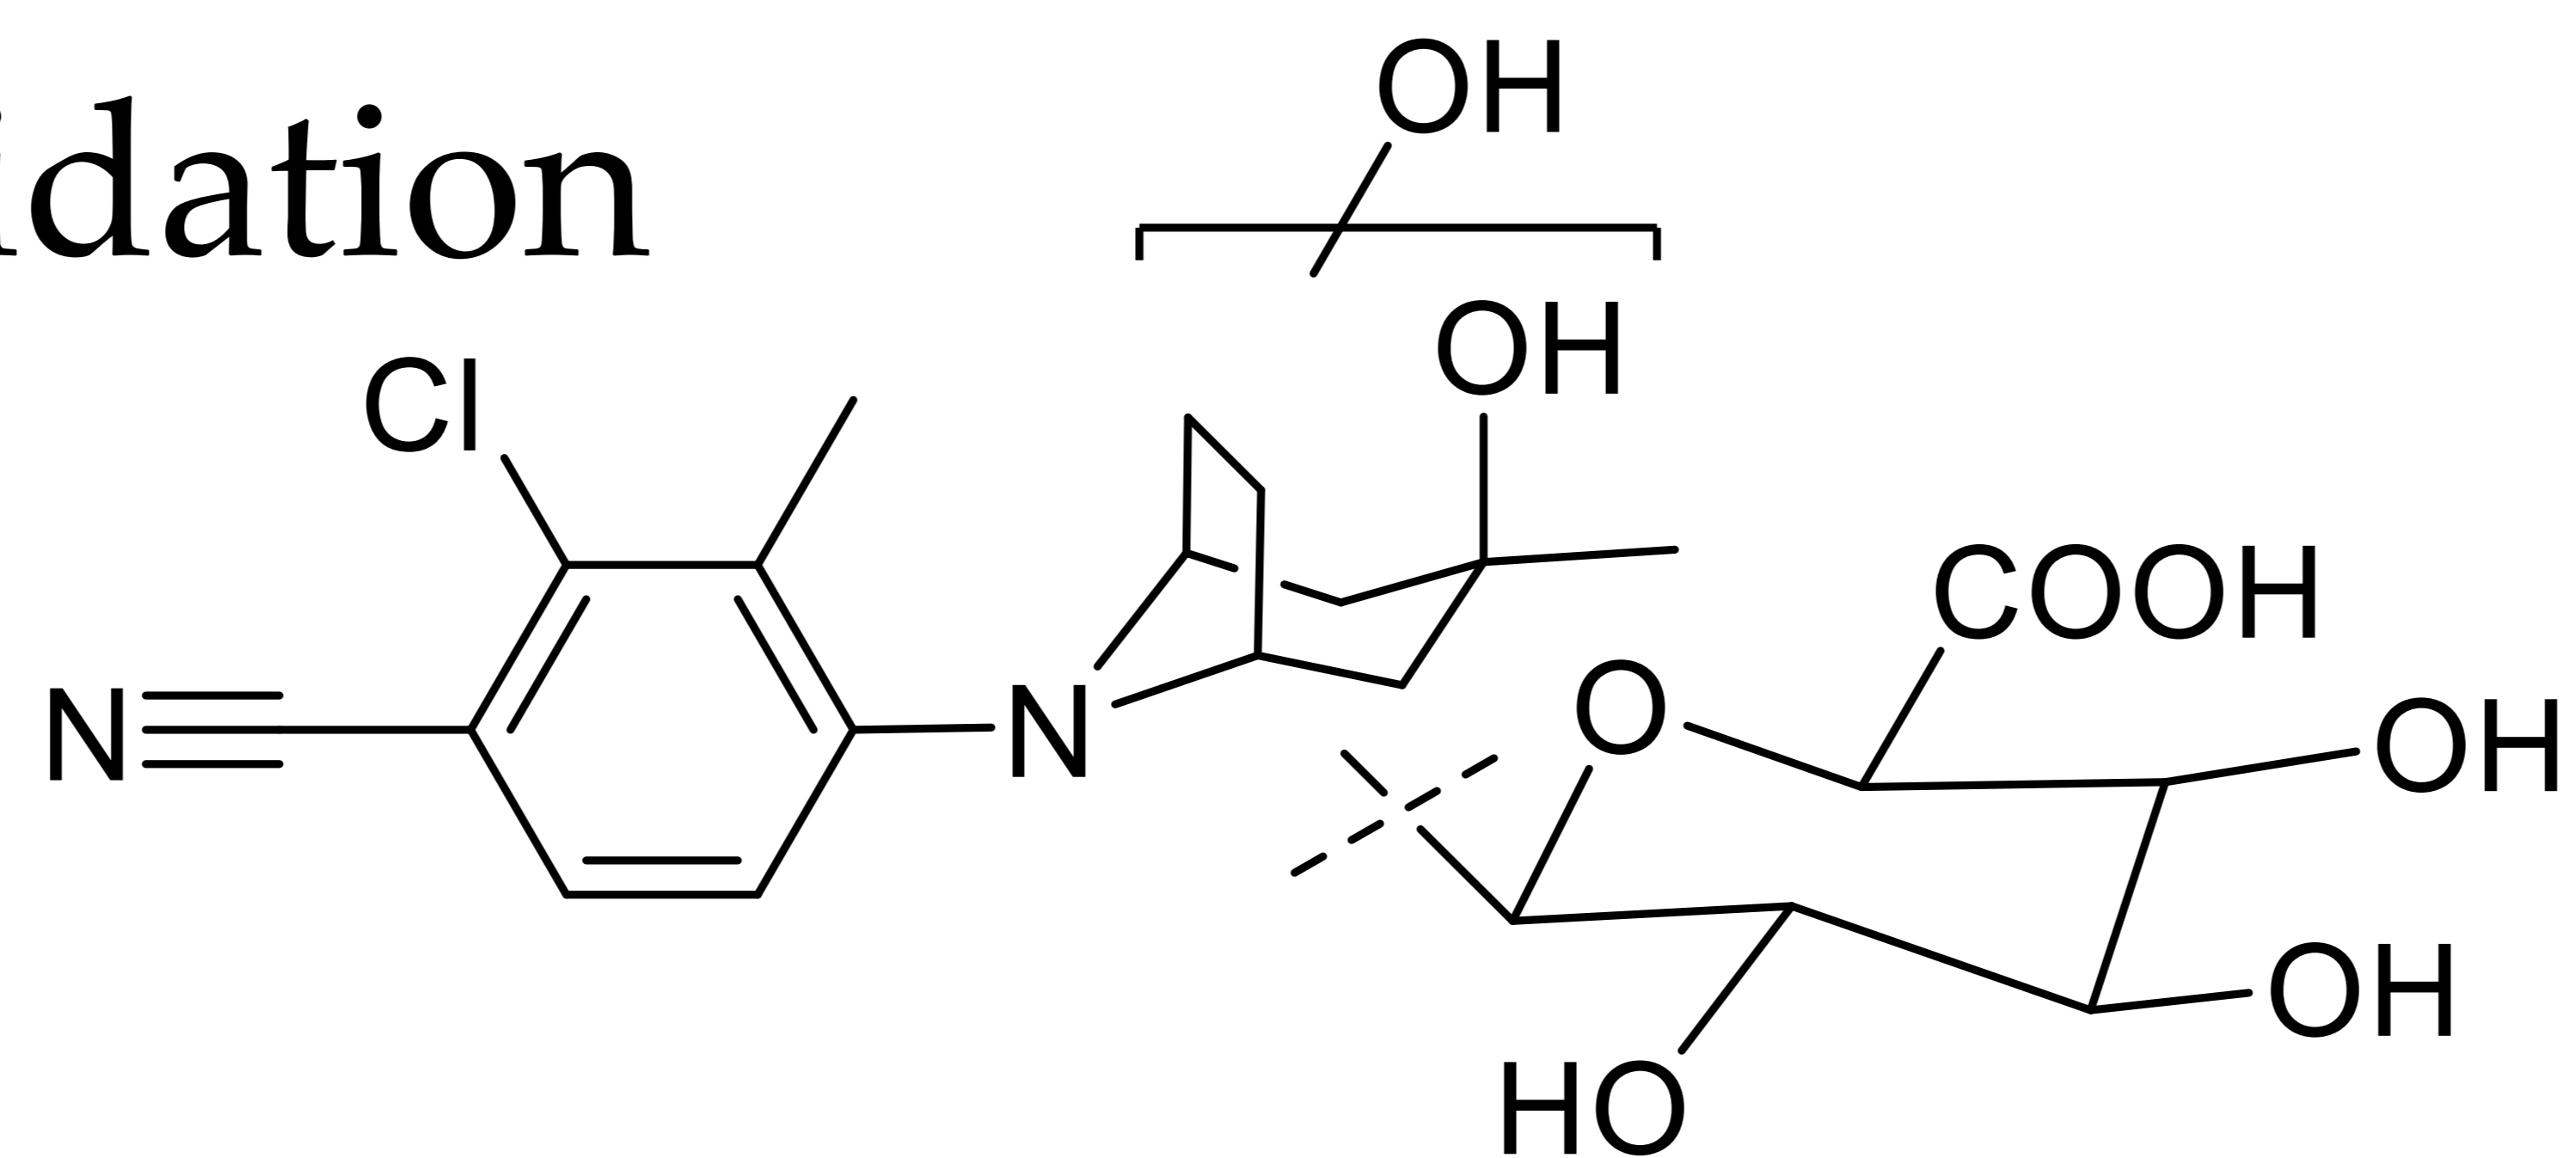

MNB\_20200429\_05 #1408-1421 RT: 7.1-7.18 AV: 3 SB: 5 7.03-7.10 , 7.18-7.22 NL: 7.53E+006  
T: FTMS + p ESI Full ms2 483.1529@hcd38.33 [50.0000-510.0000]

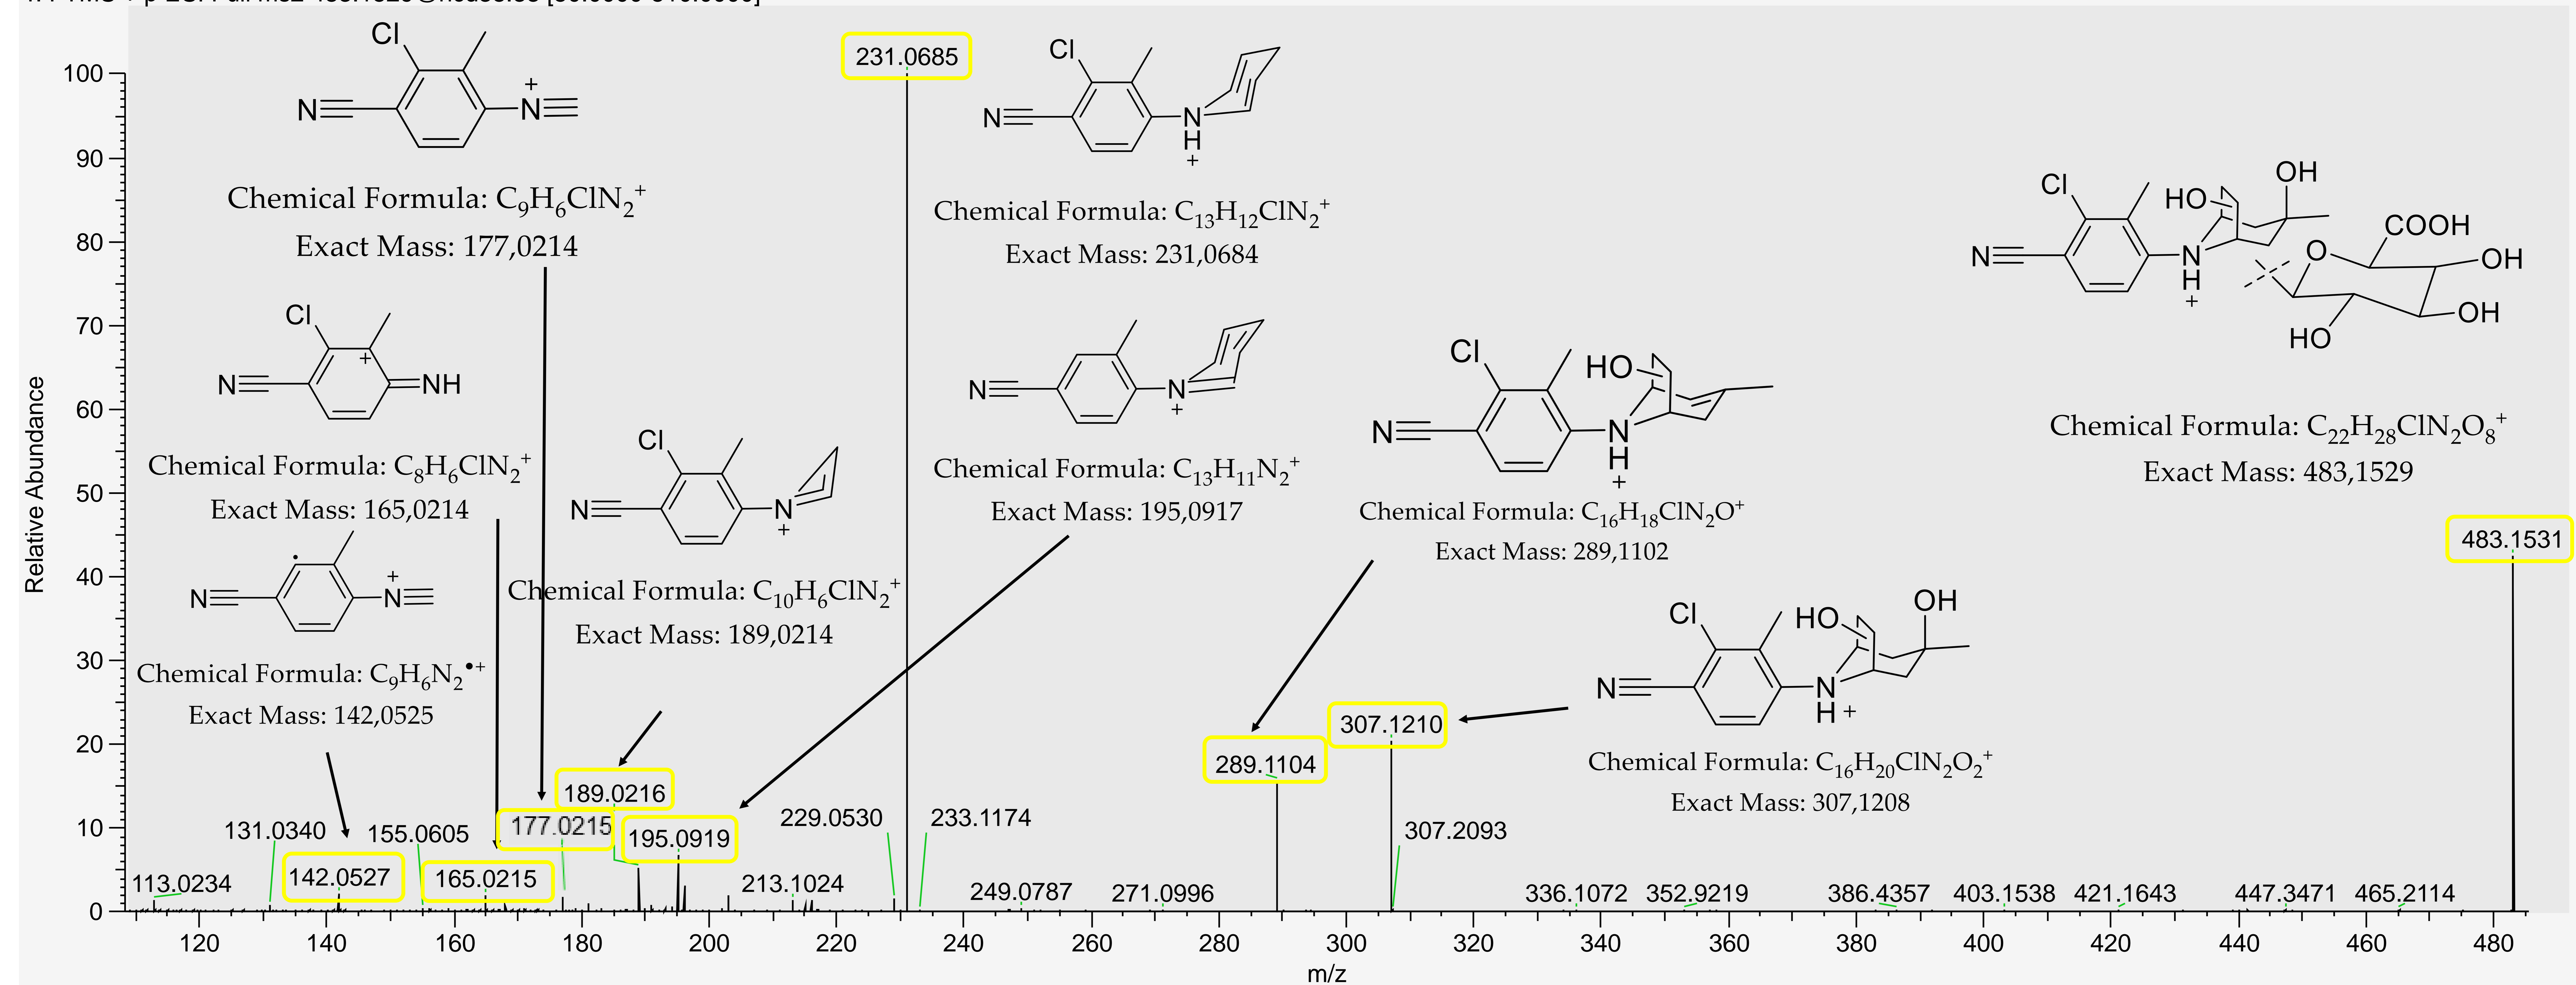



# M8b

Monohydroxylation + glucuronidation

Retention time: 7.61 min

m/z: 483.1527

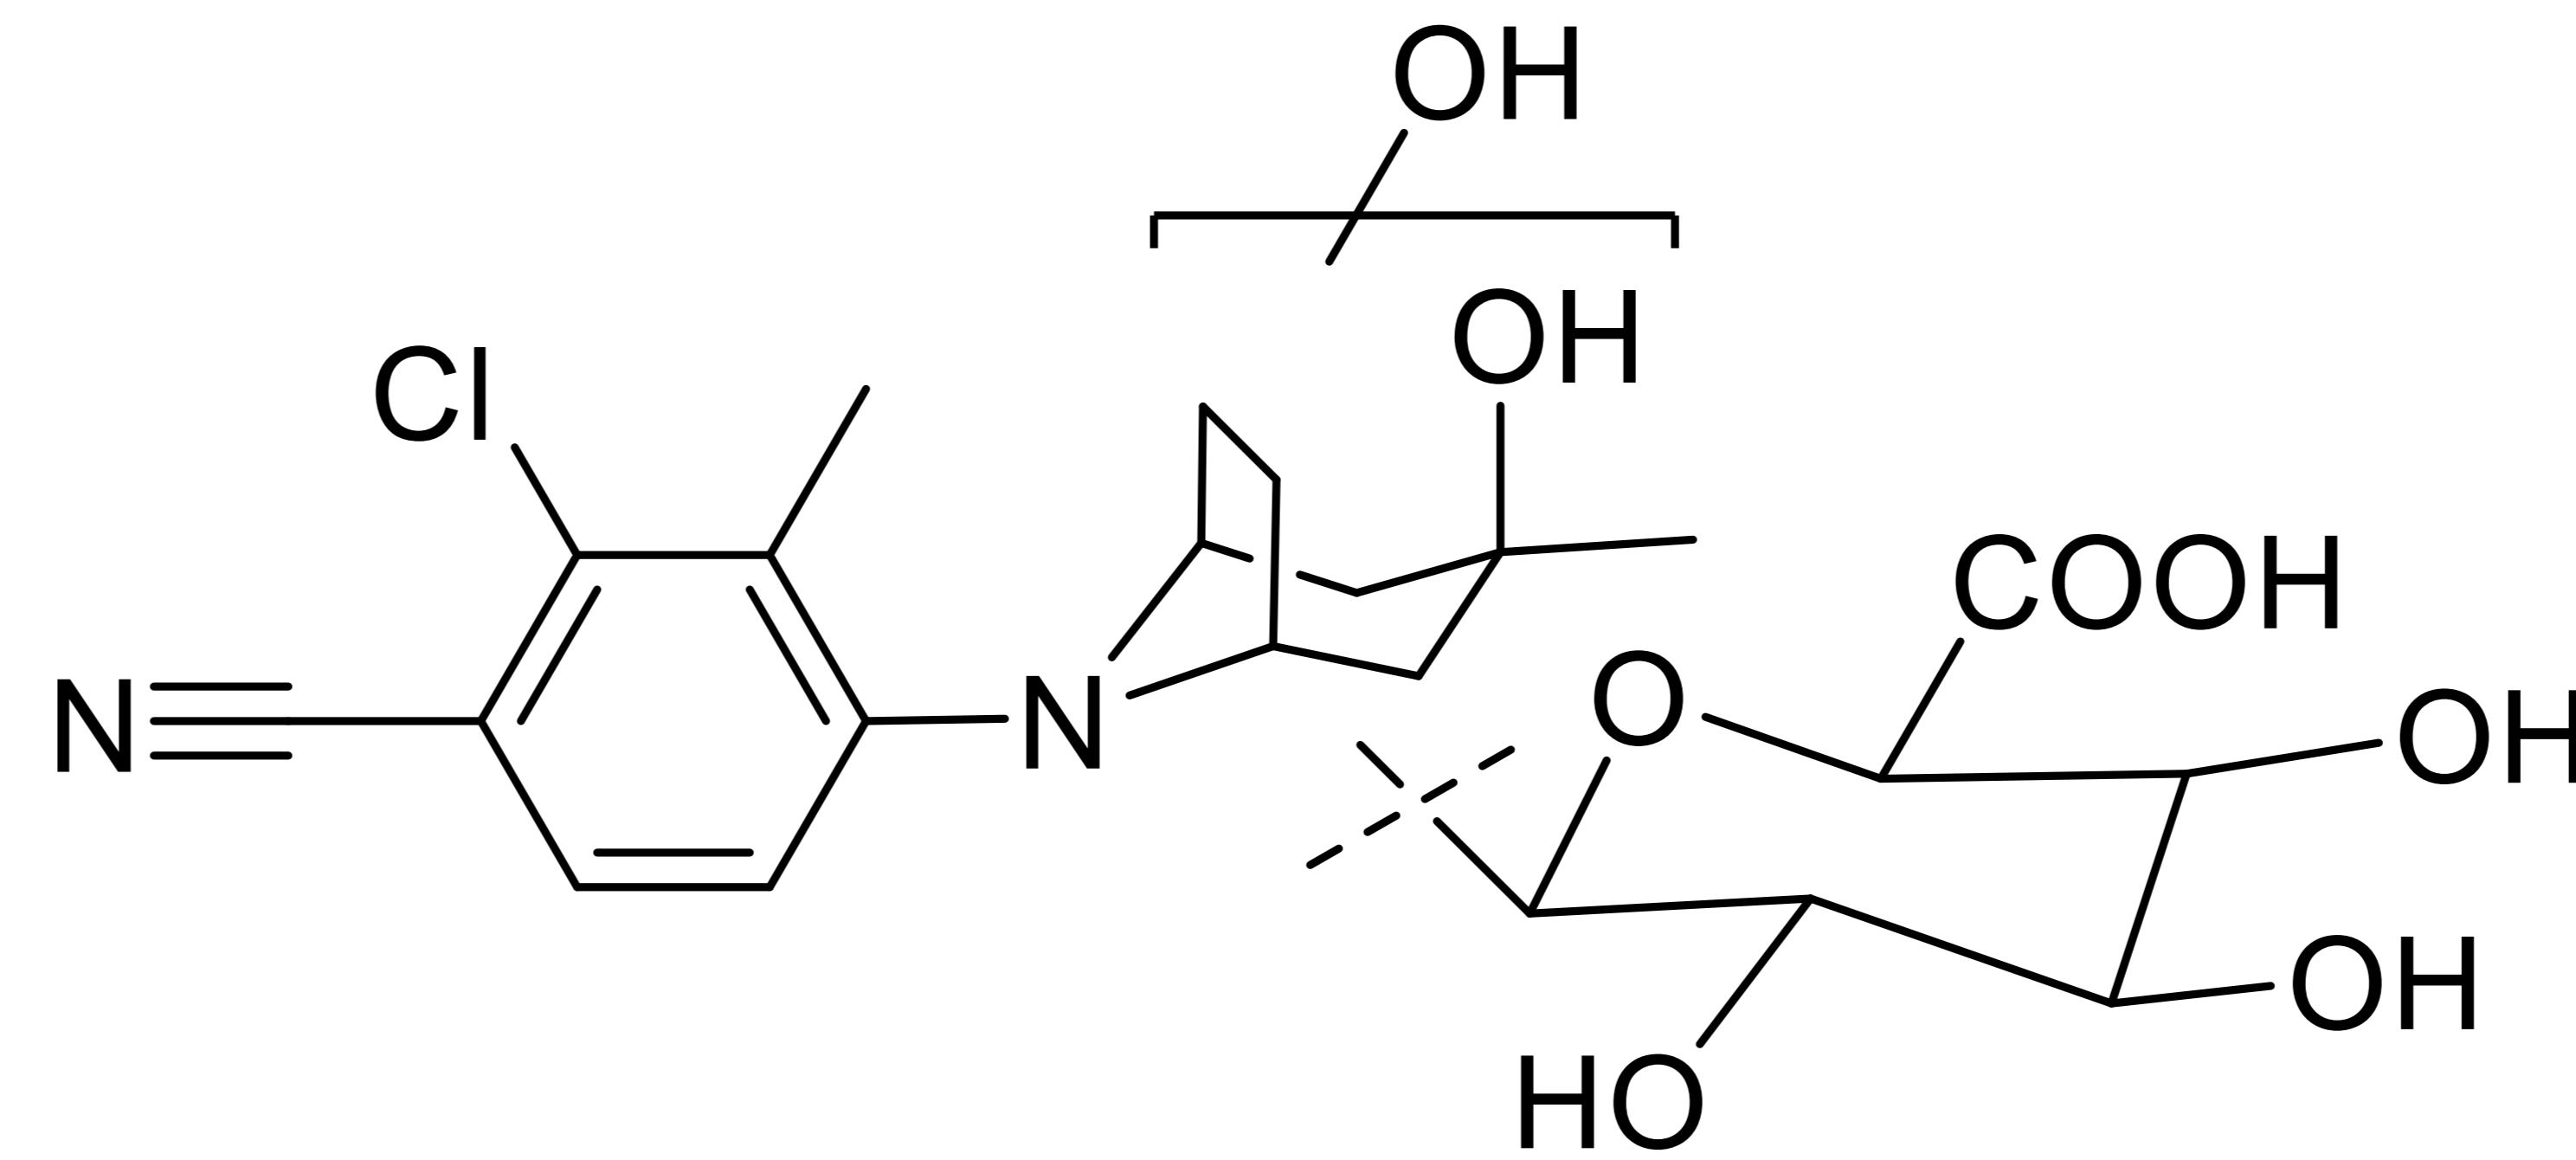

*Very low intensity of remaining m/z 483.1527 and co-eluting with other ions and thereby not visible in spectrum*

MNB\_20200429\_05 #1487-1494 RT: 7.6-7.64 AV: 2 SB: 5 7.53-7.60 , 7.64-7.69 NL: 8.46E+004  
T: FTMS + p ESI Full ms2 483.1529@hcd38.33 [50.0000-510.0000]

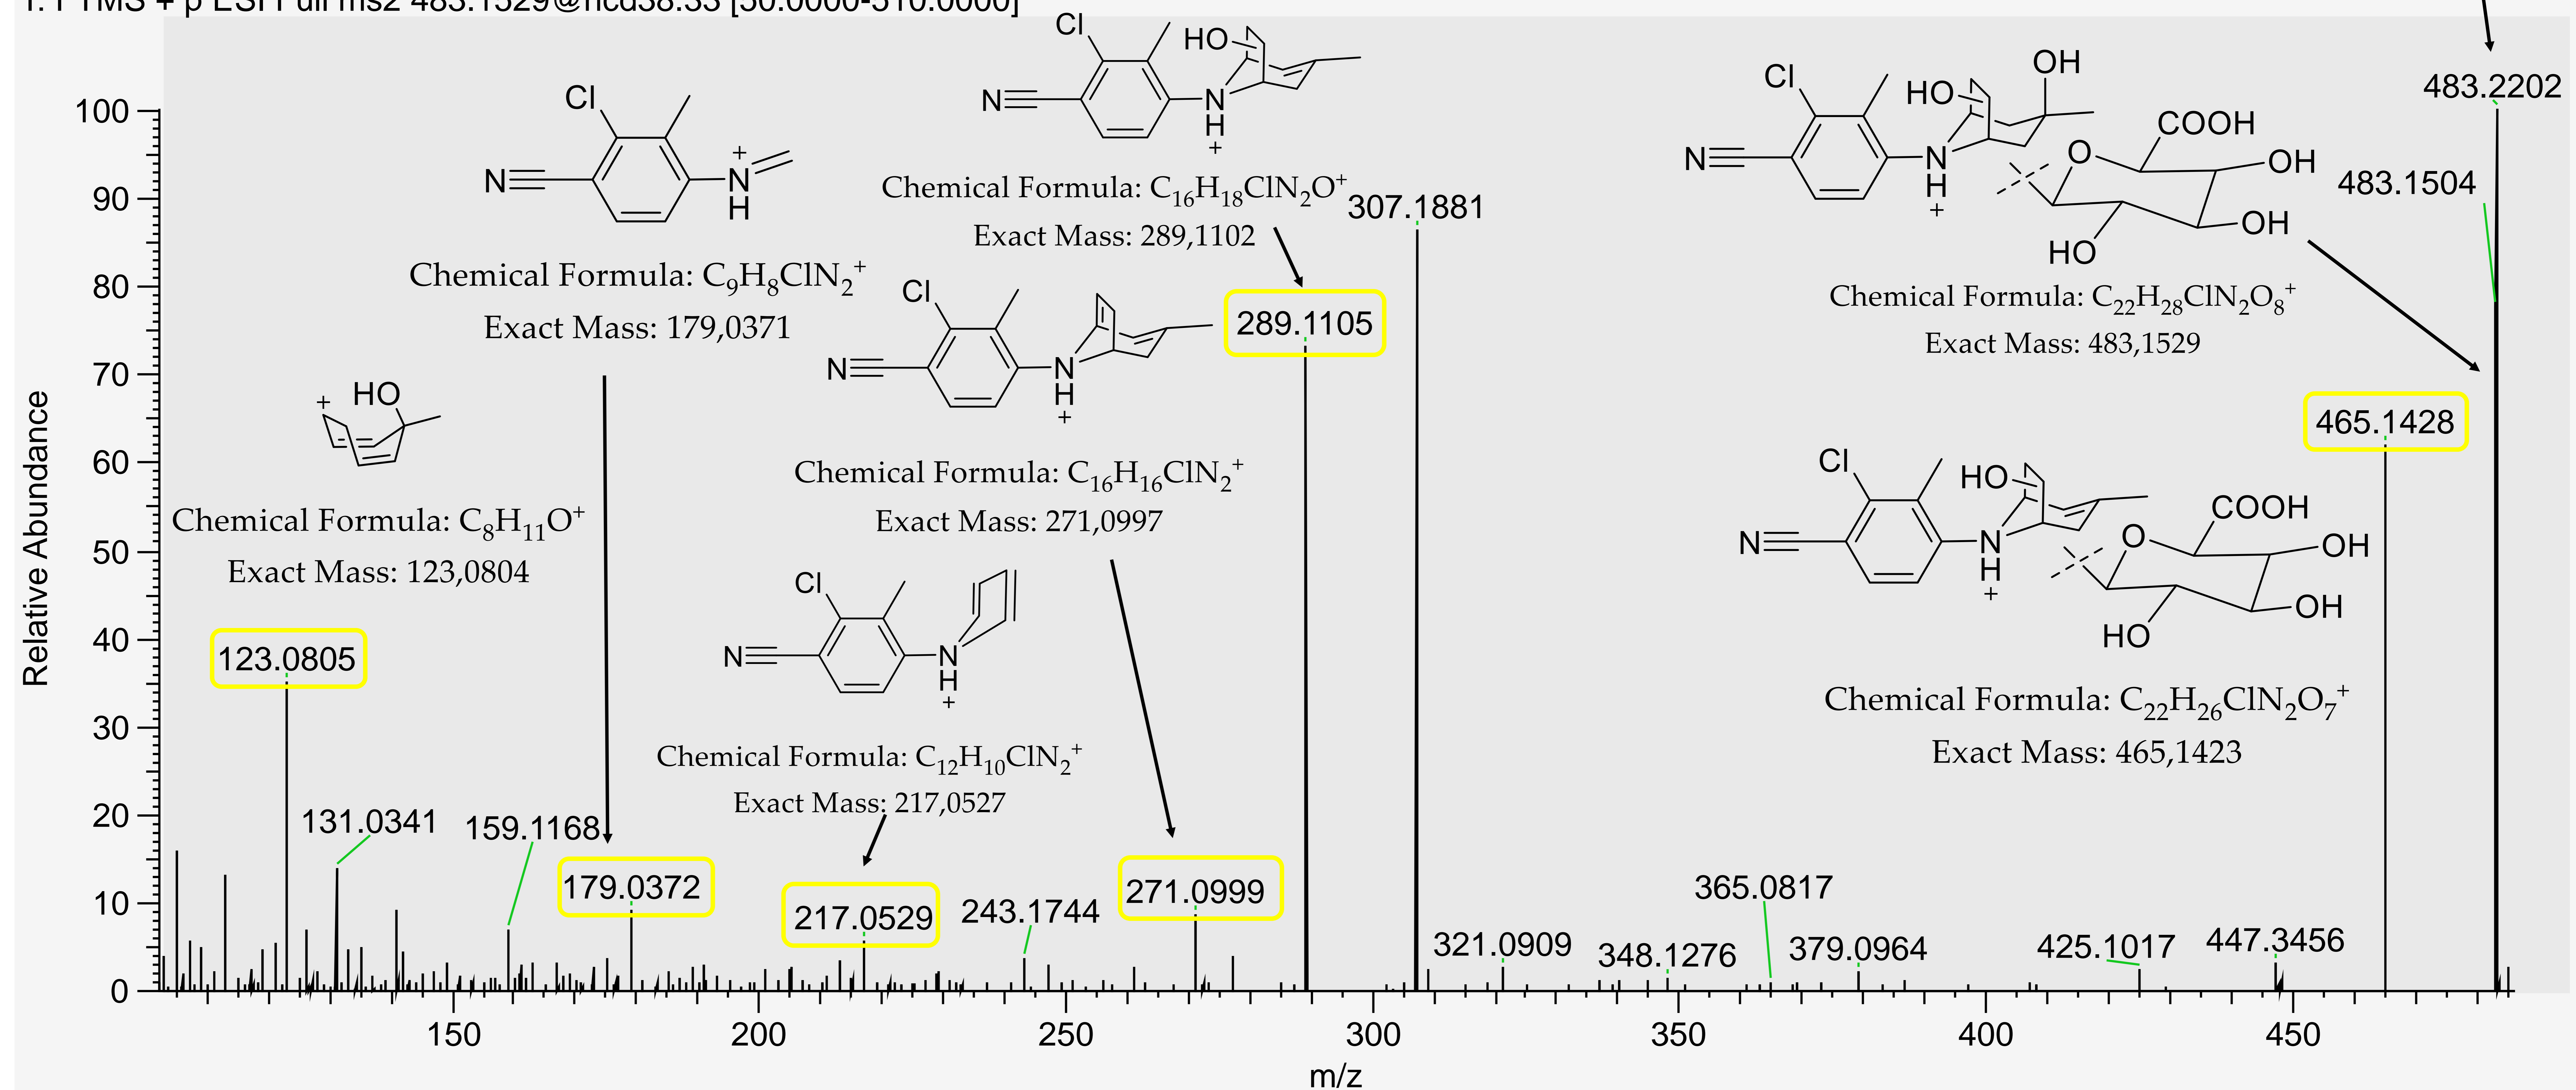



# M8c

Monohydroxylation + glucuronidation

Retention time: 7.85 min

m/z: 483.1524

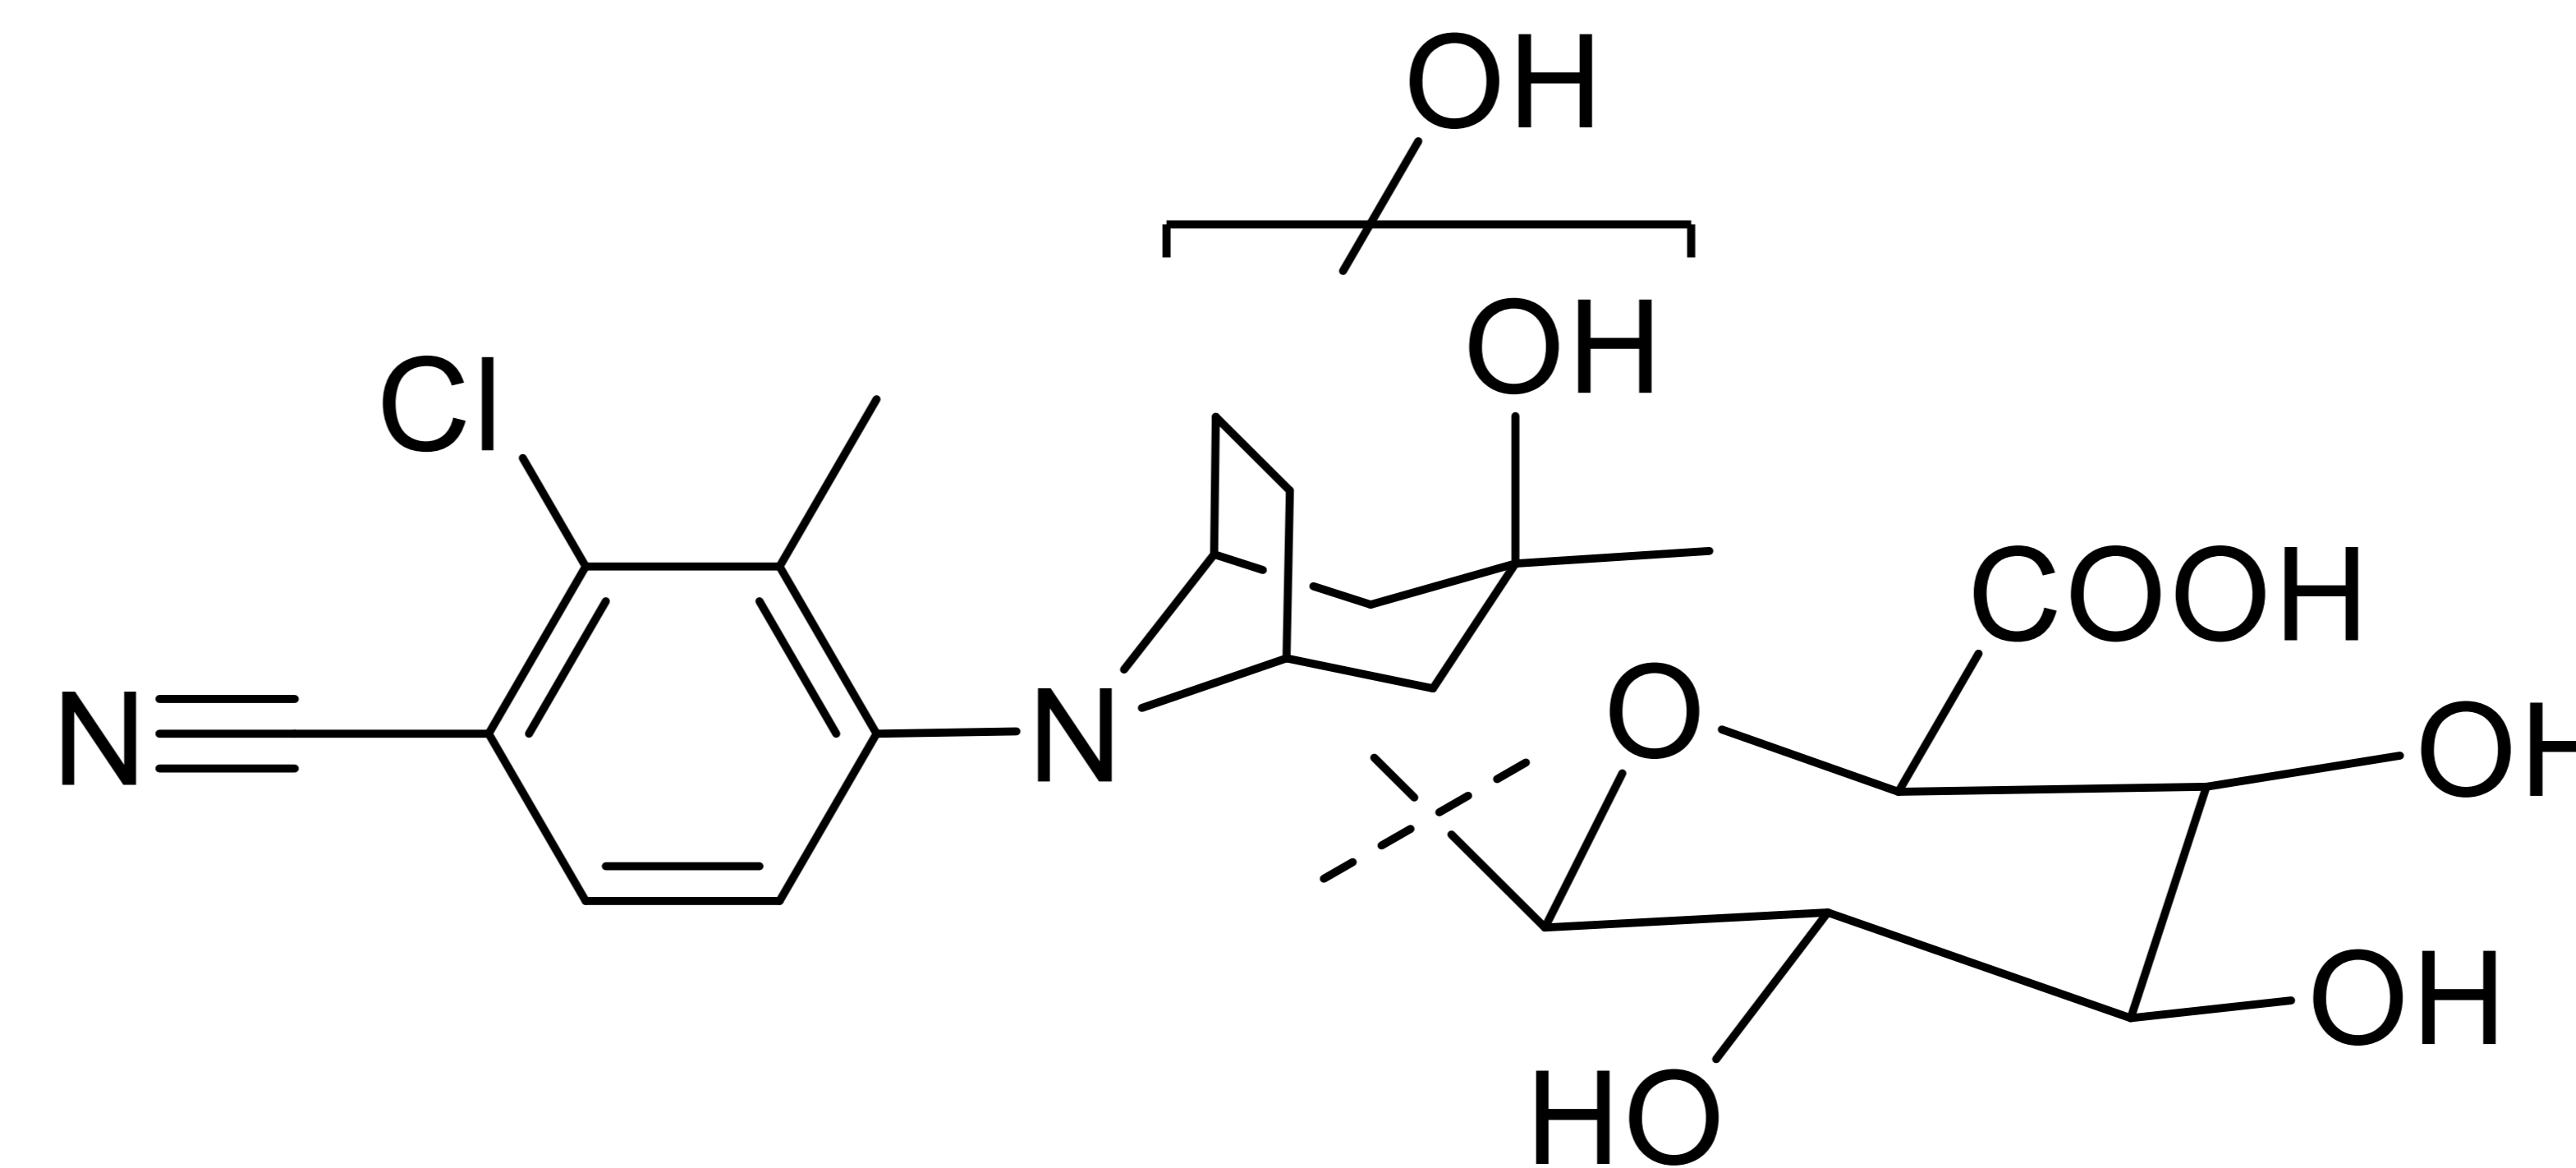

*Very low intensity of remaining m/z 483.1524 and co-eluting with other ions and thereby not visible in spectrum*

MNB\_20200429\_05 #1523-1533 RT: 7.82-7.88 AV: 3 SB: 5 7.76-7.82 , 7.88-7.93 NL: 7.59E+004  
T: FTMS + p ESI Full ms2 483.1529@hcd38.33 [50.0000-510.0000]

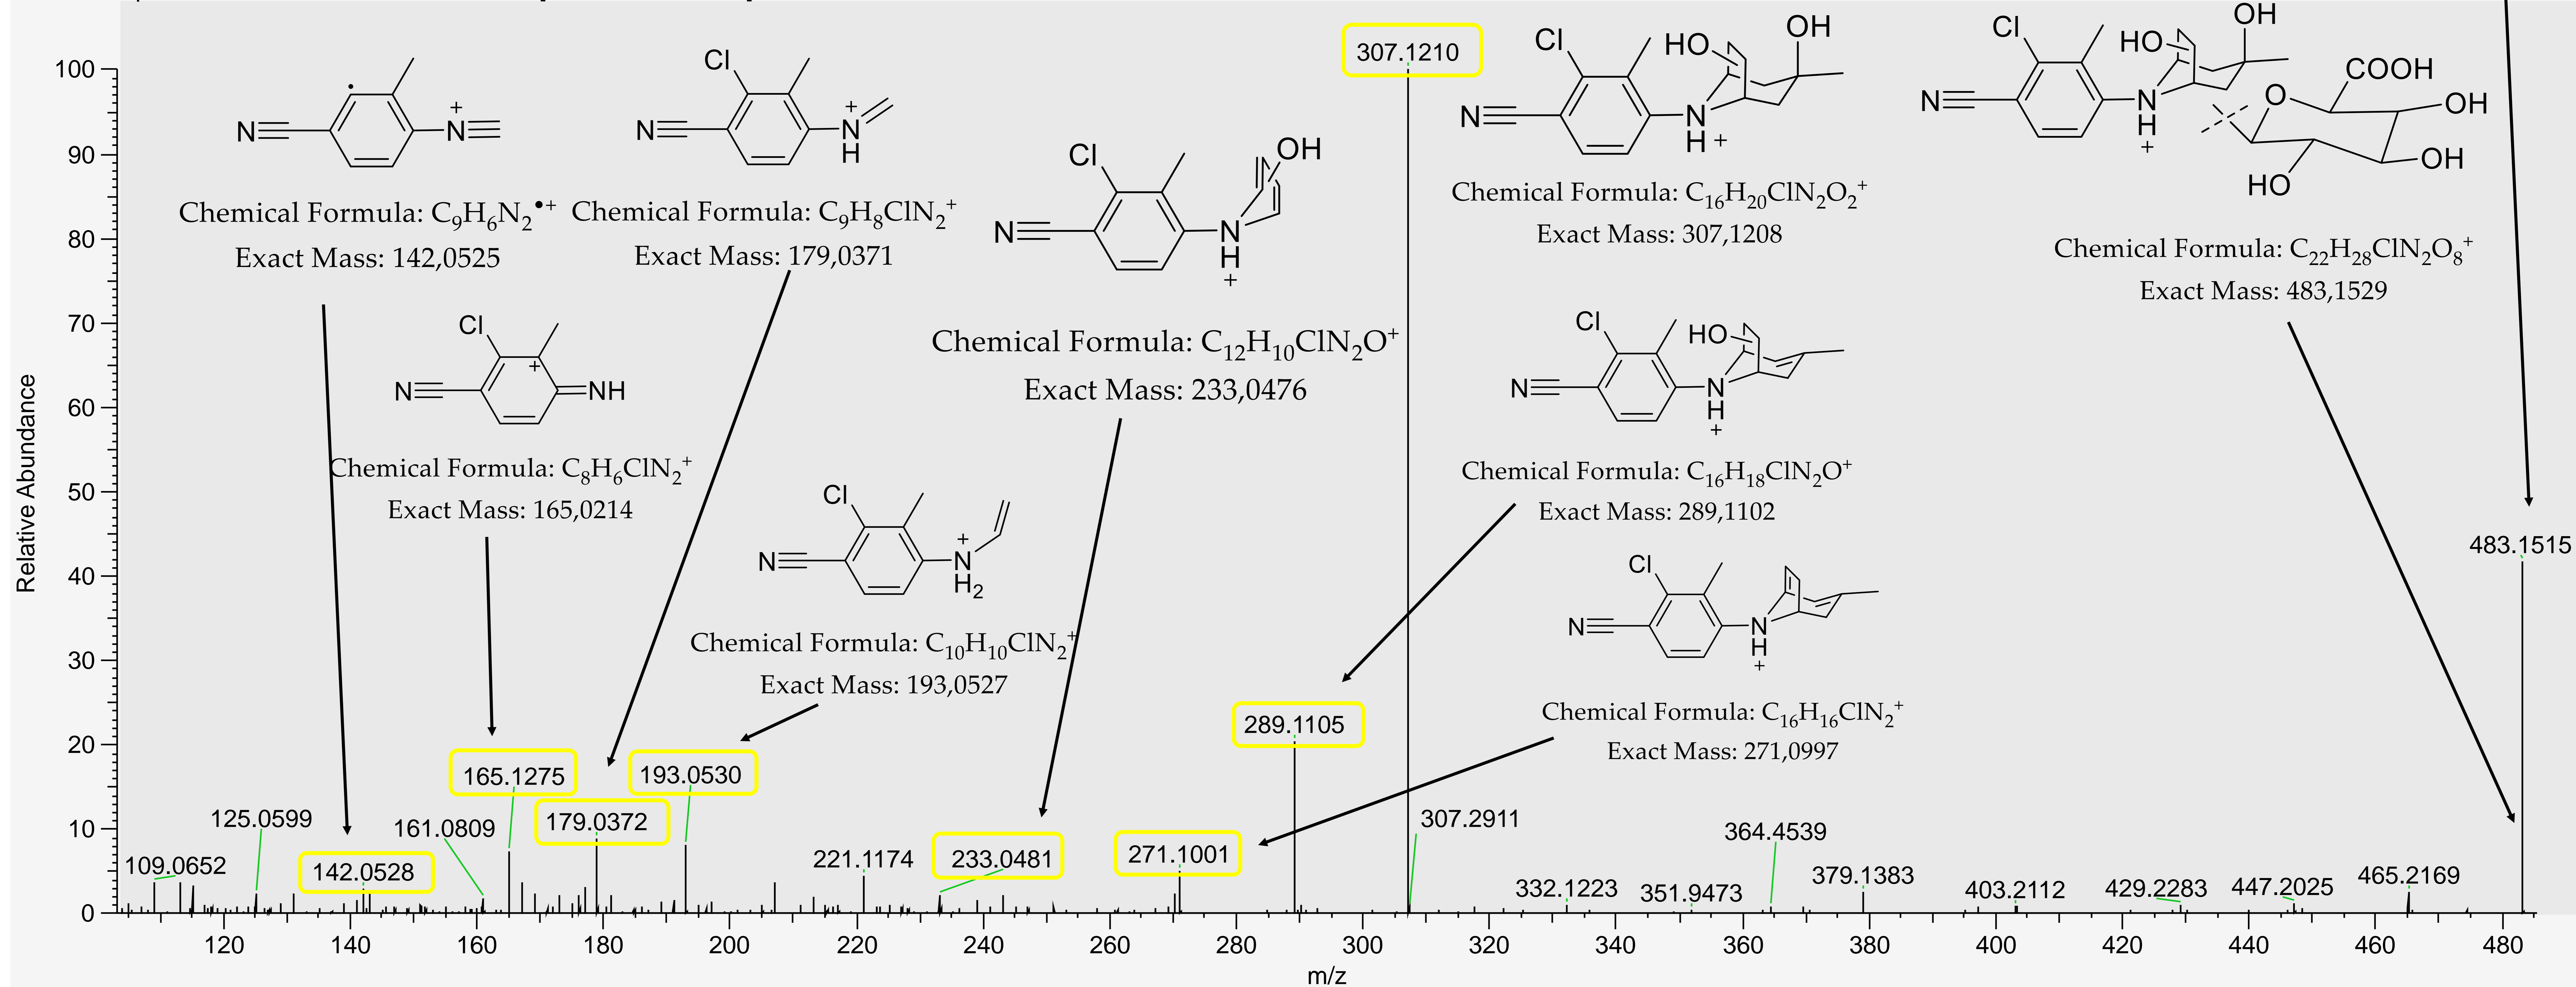



# M8d

Monohydroxylation + glucuronidation

Retention time: 8.00 min

m/z: 483.1530

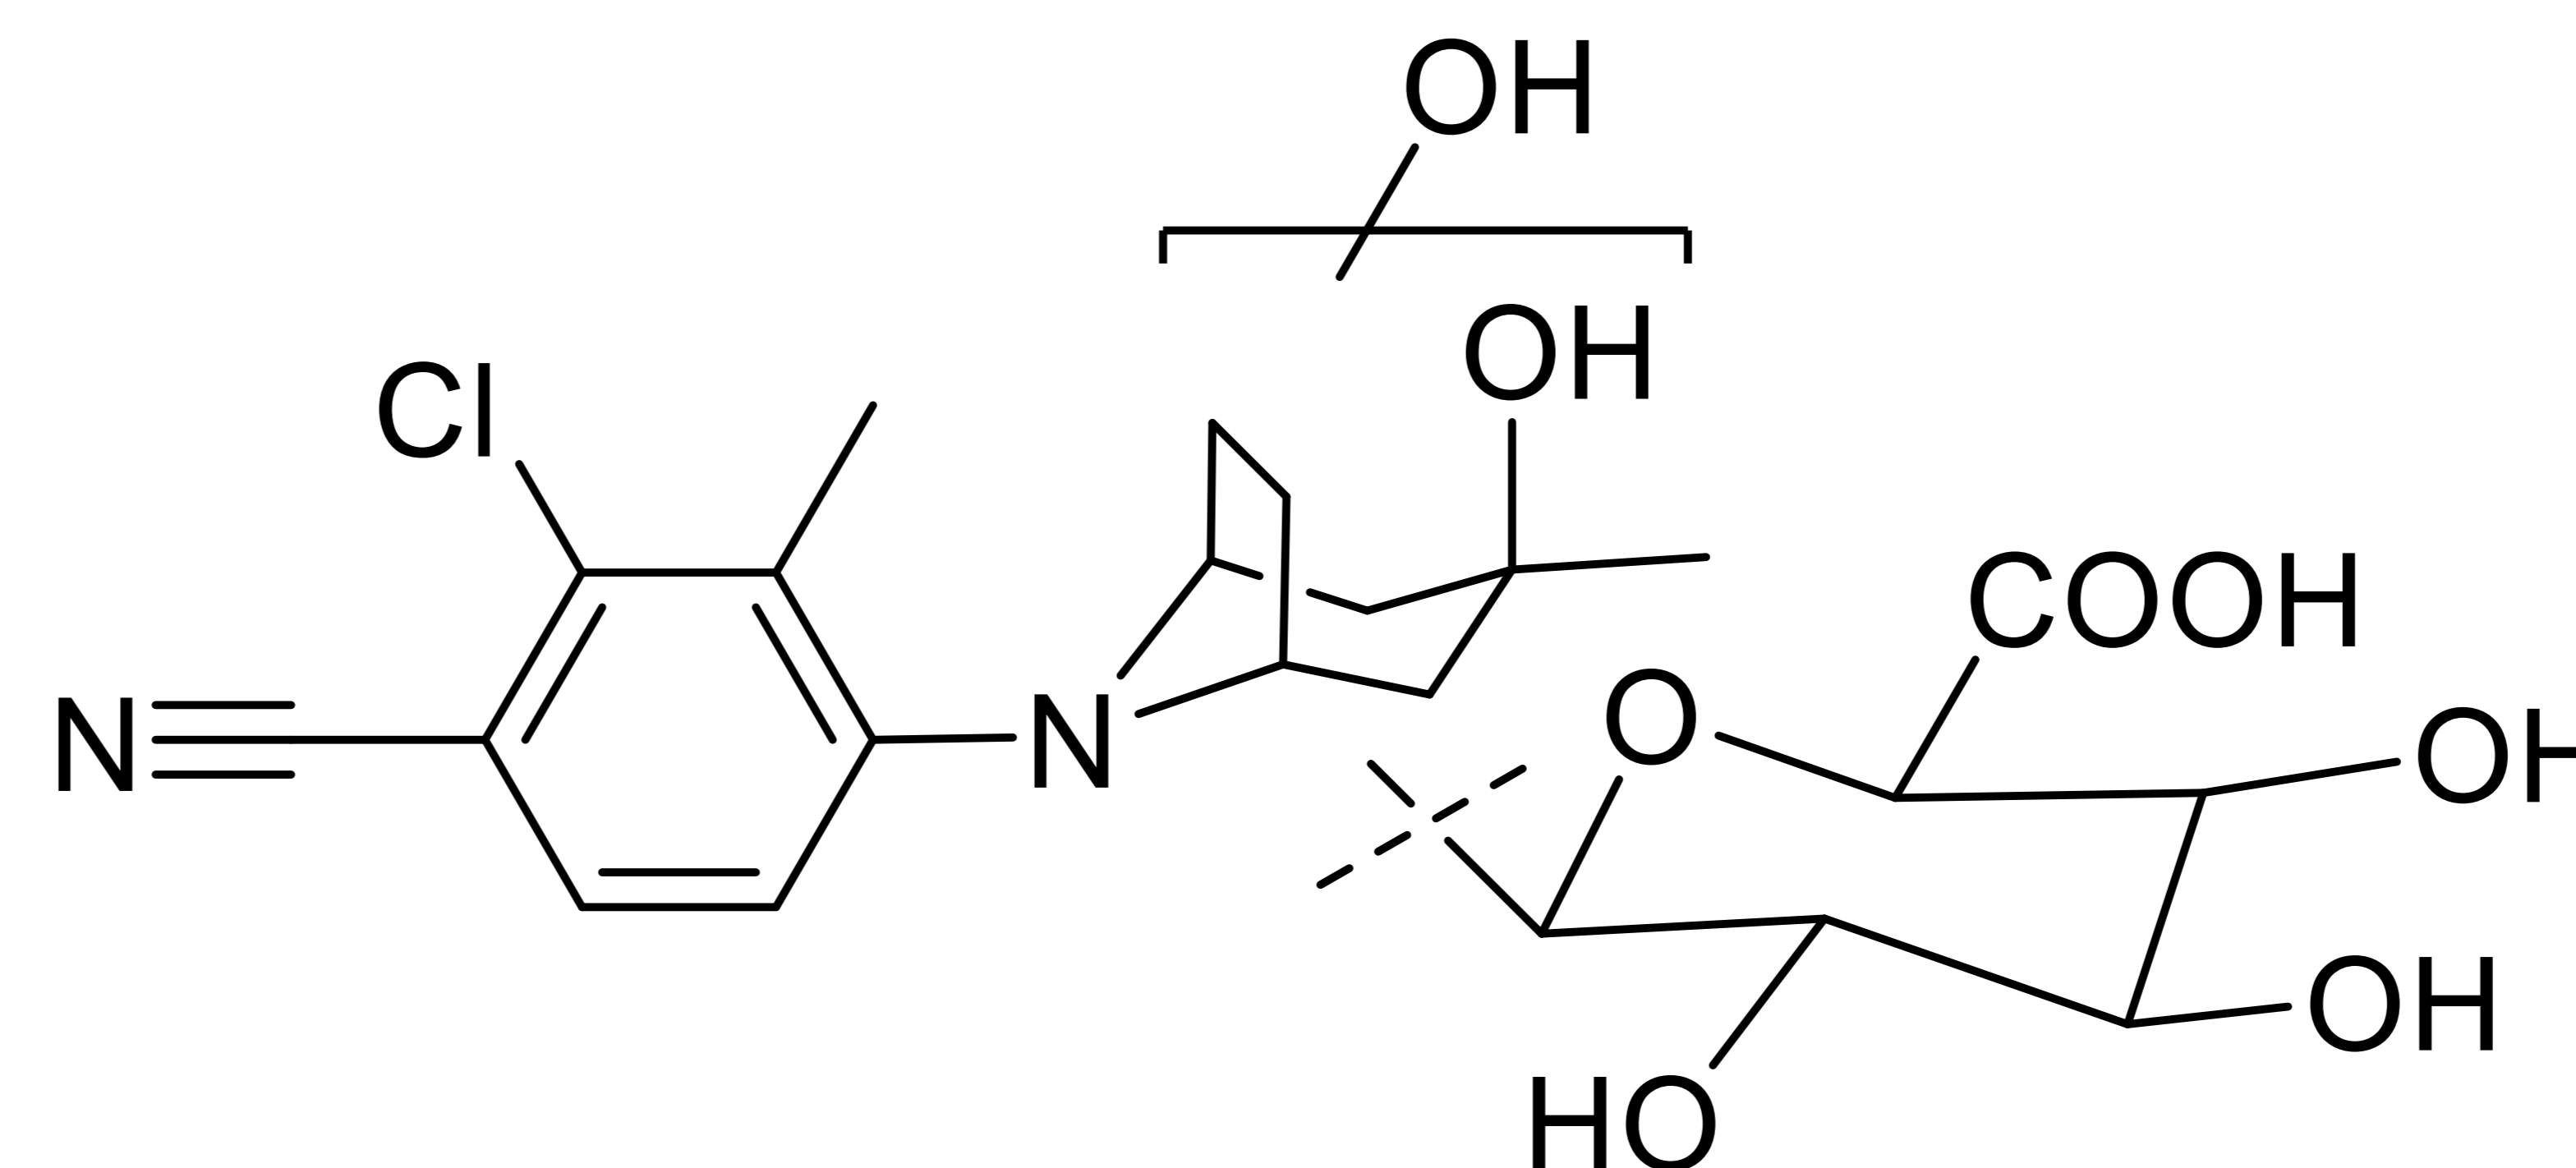

MNB\_20200429\_05 #1546-1557 RT: 7.96-8.03 AV: 4 SB: 7 7.90-7.96 , 8.03-8.10 NL: 1.02E+007

T: FTMS + p ESI Full ms2 483.1529@hcd38.33 [50.0000-510.0000]

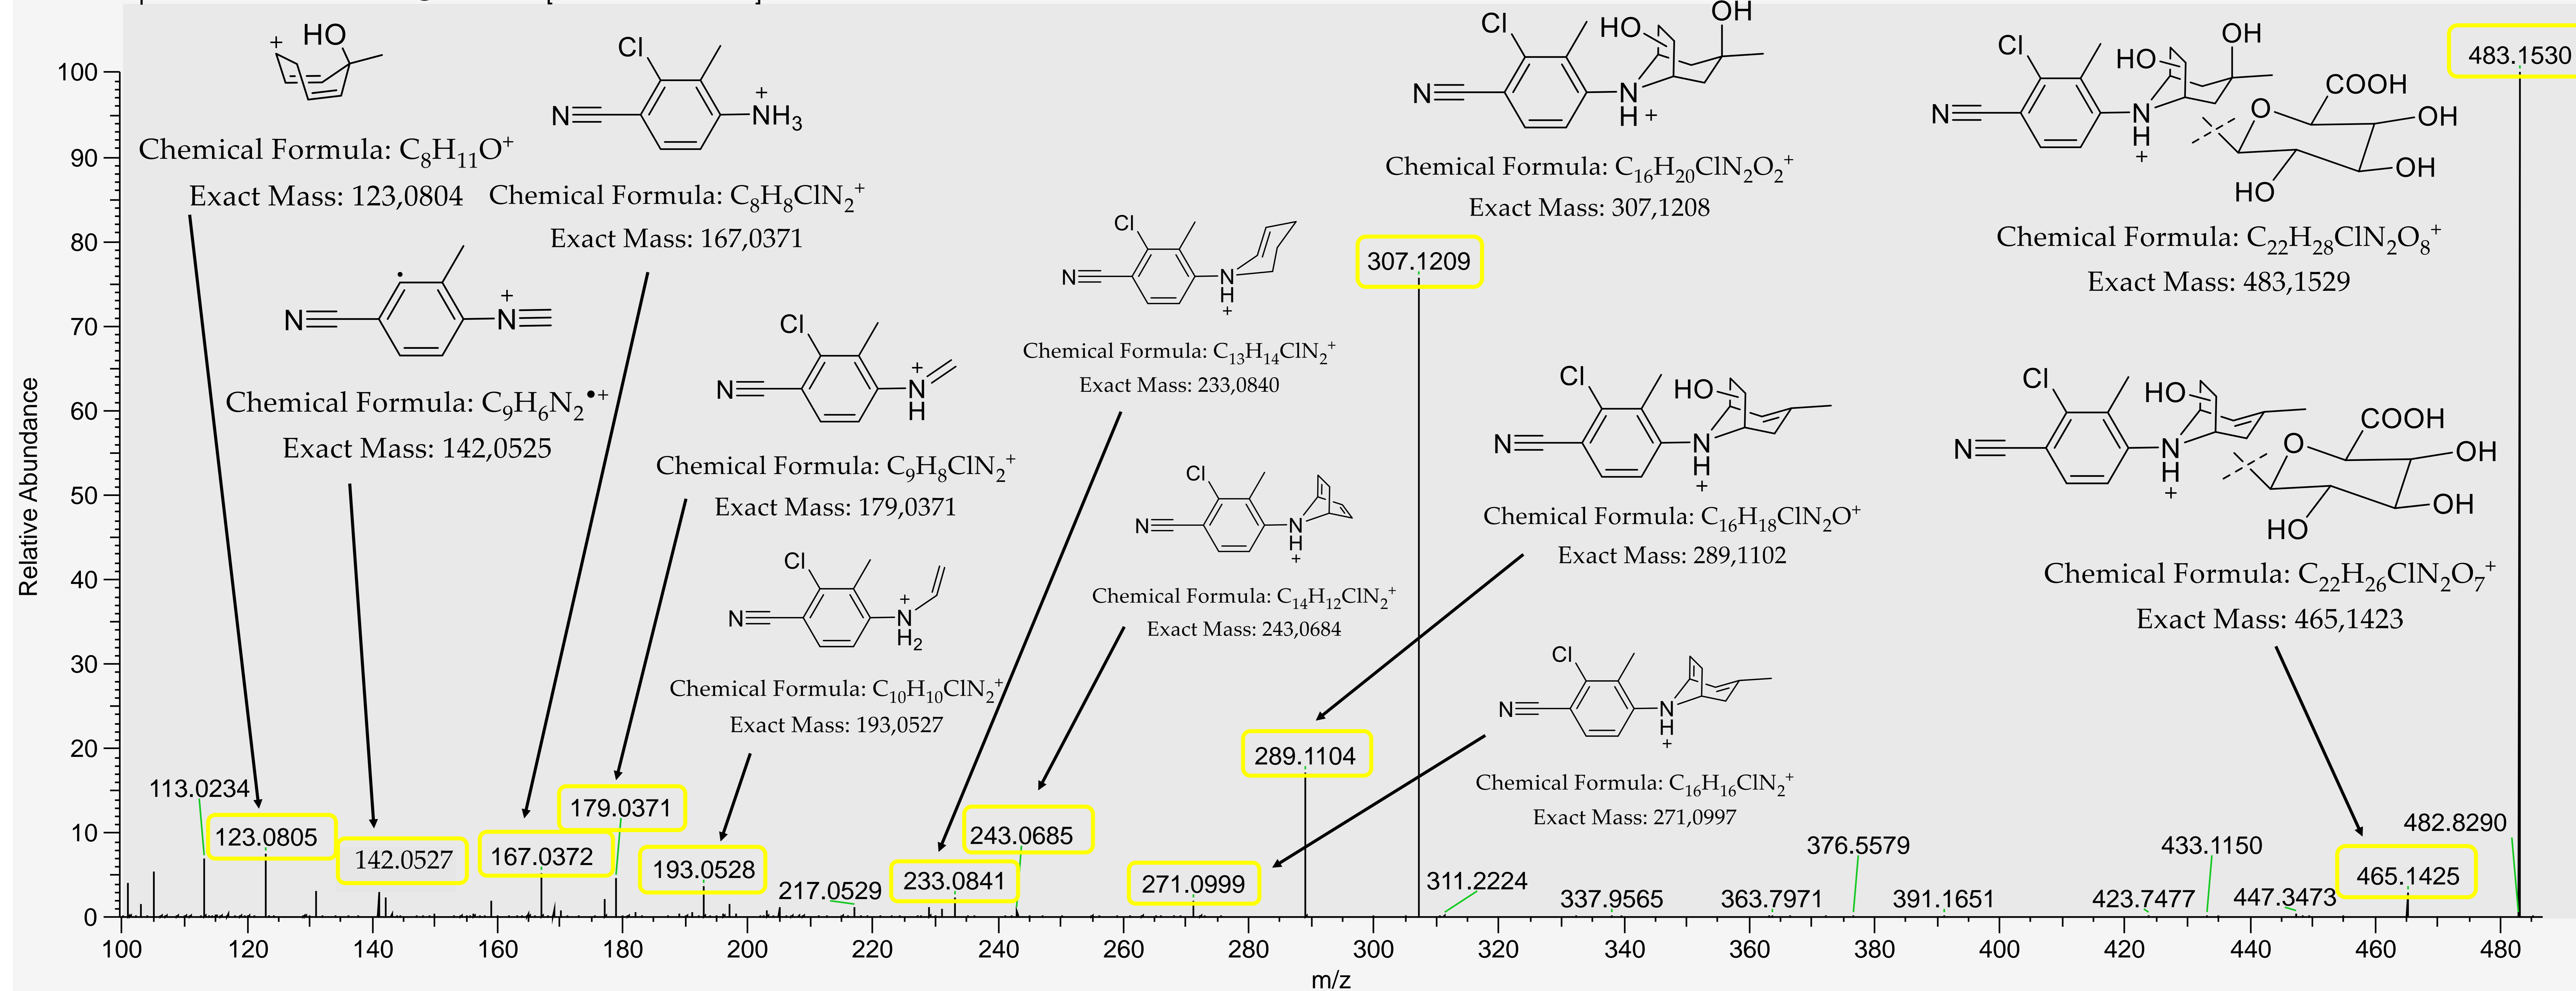



# M9a

Dihydroxylation + glucuronidation

Retention time: 6.21 min

m/z: 499.1470

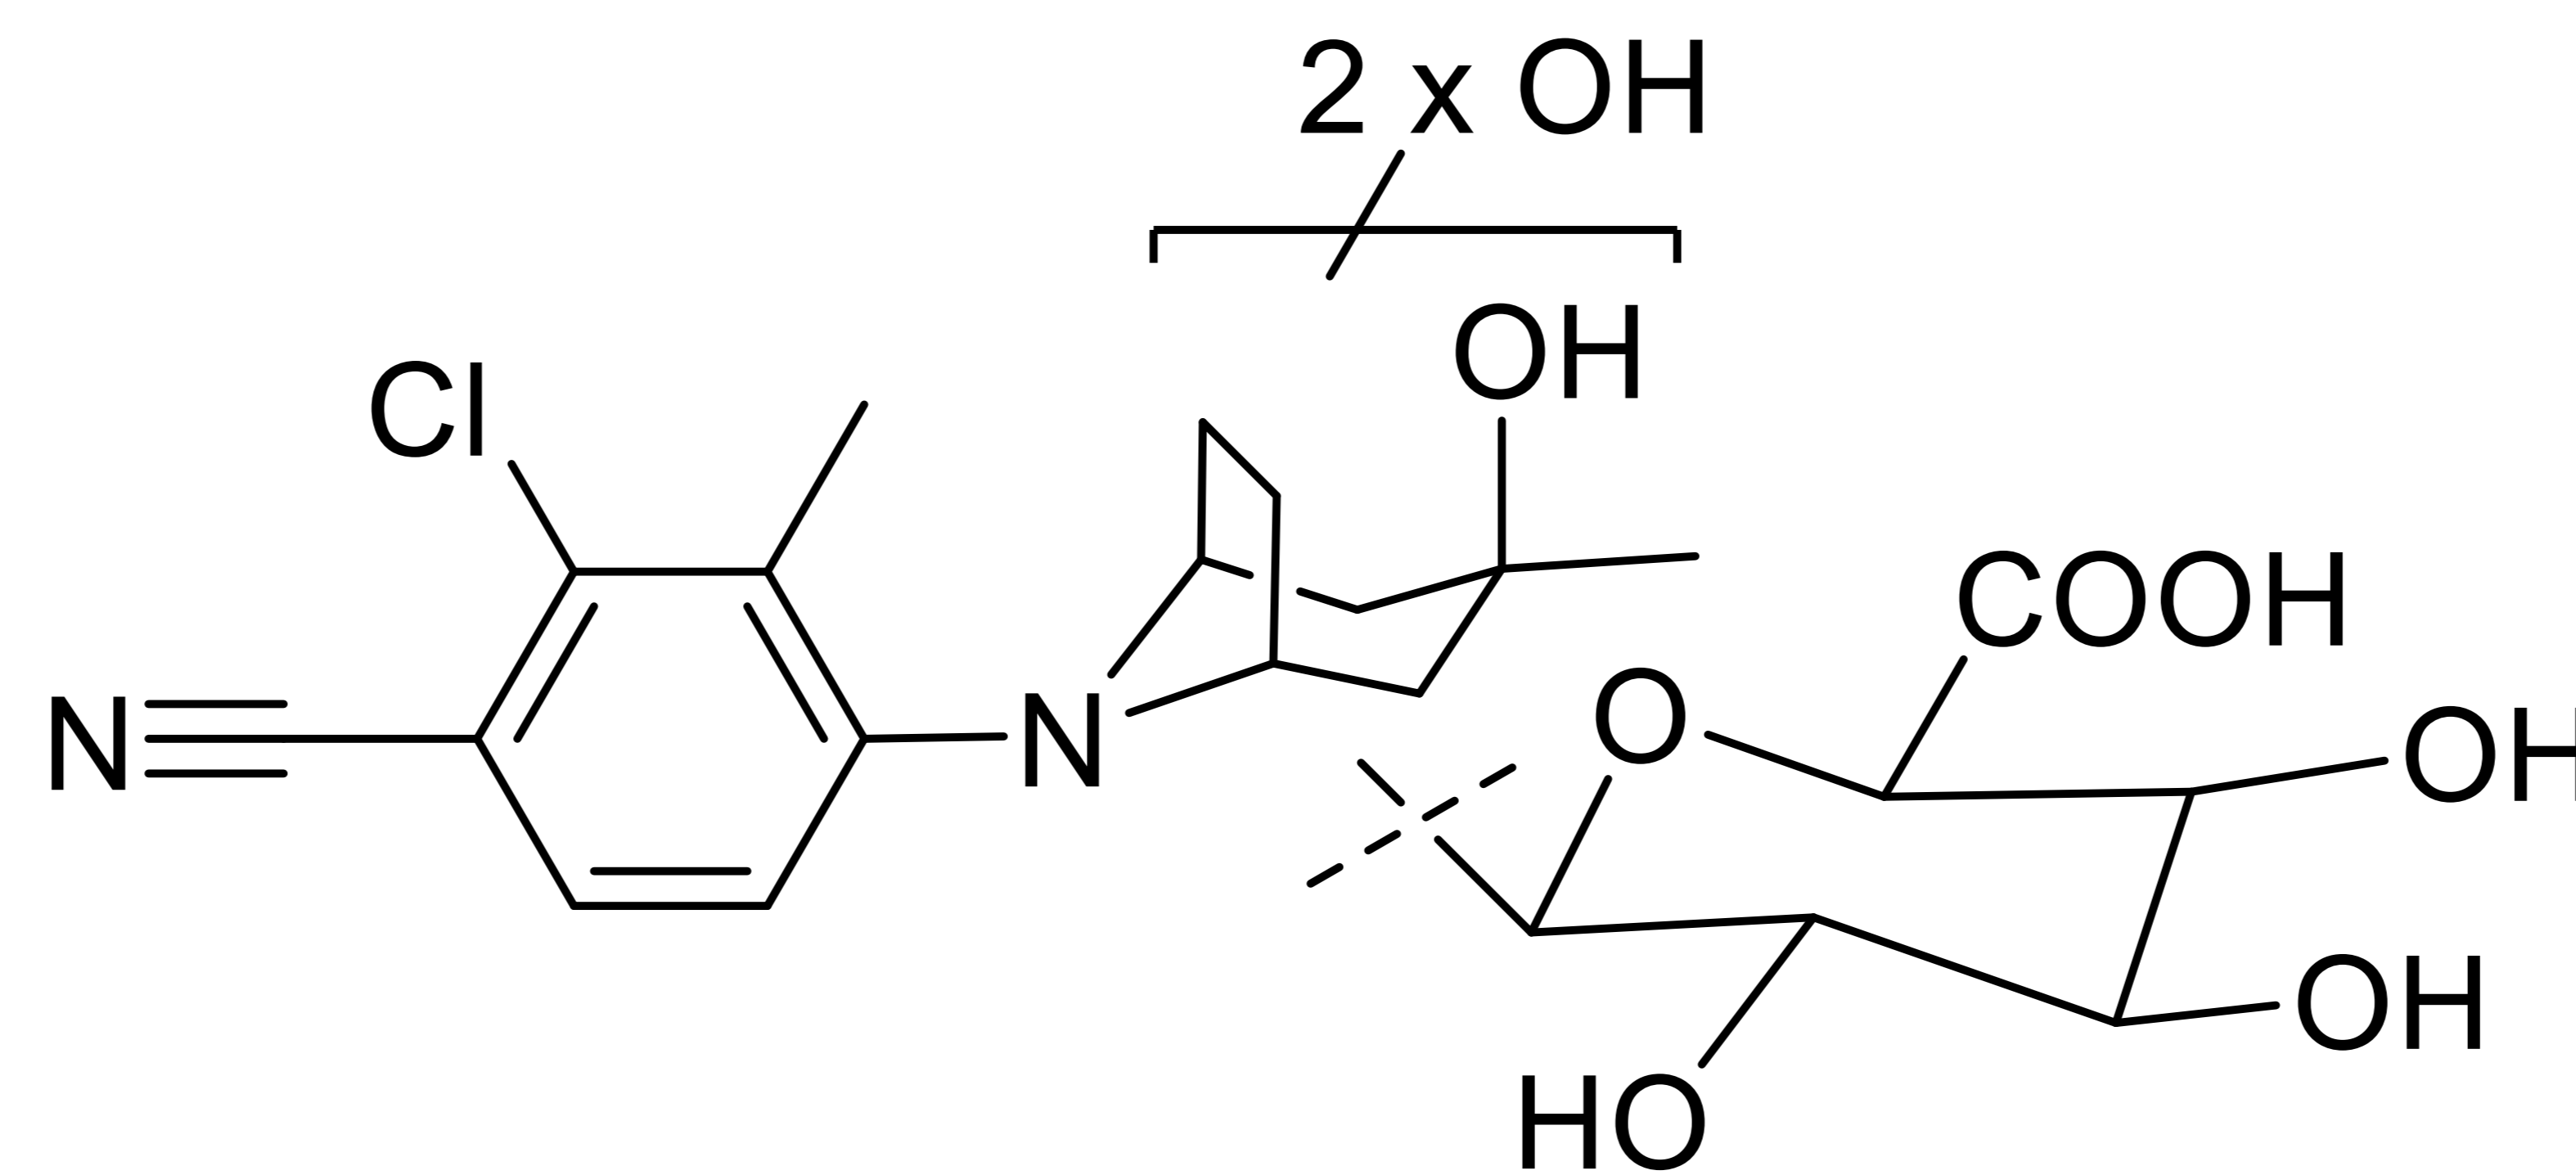

MNB\_20200429\_05 #1265-1275 RT: 6.19-6.25 AV: 4 SB: 7 6.13-6.19 , 6.25-6.31 NL: 4.23E+005  
T: FTMS + p ESI Full ms2 499.1478@hcd38.33 [50.0000-525.0000]

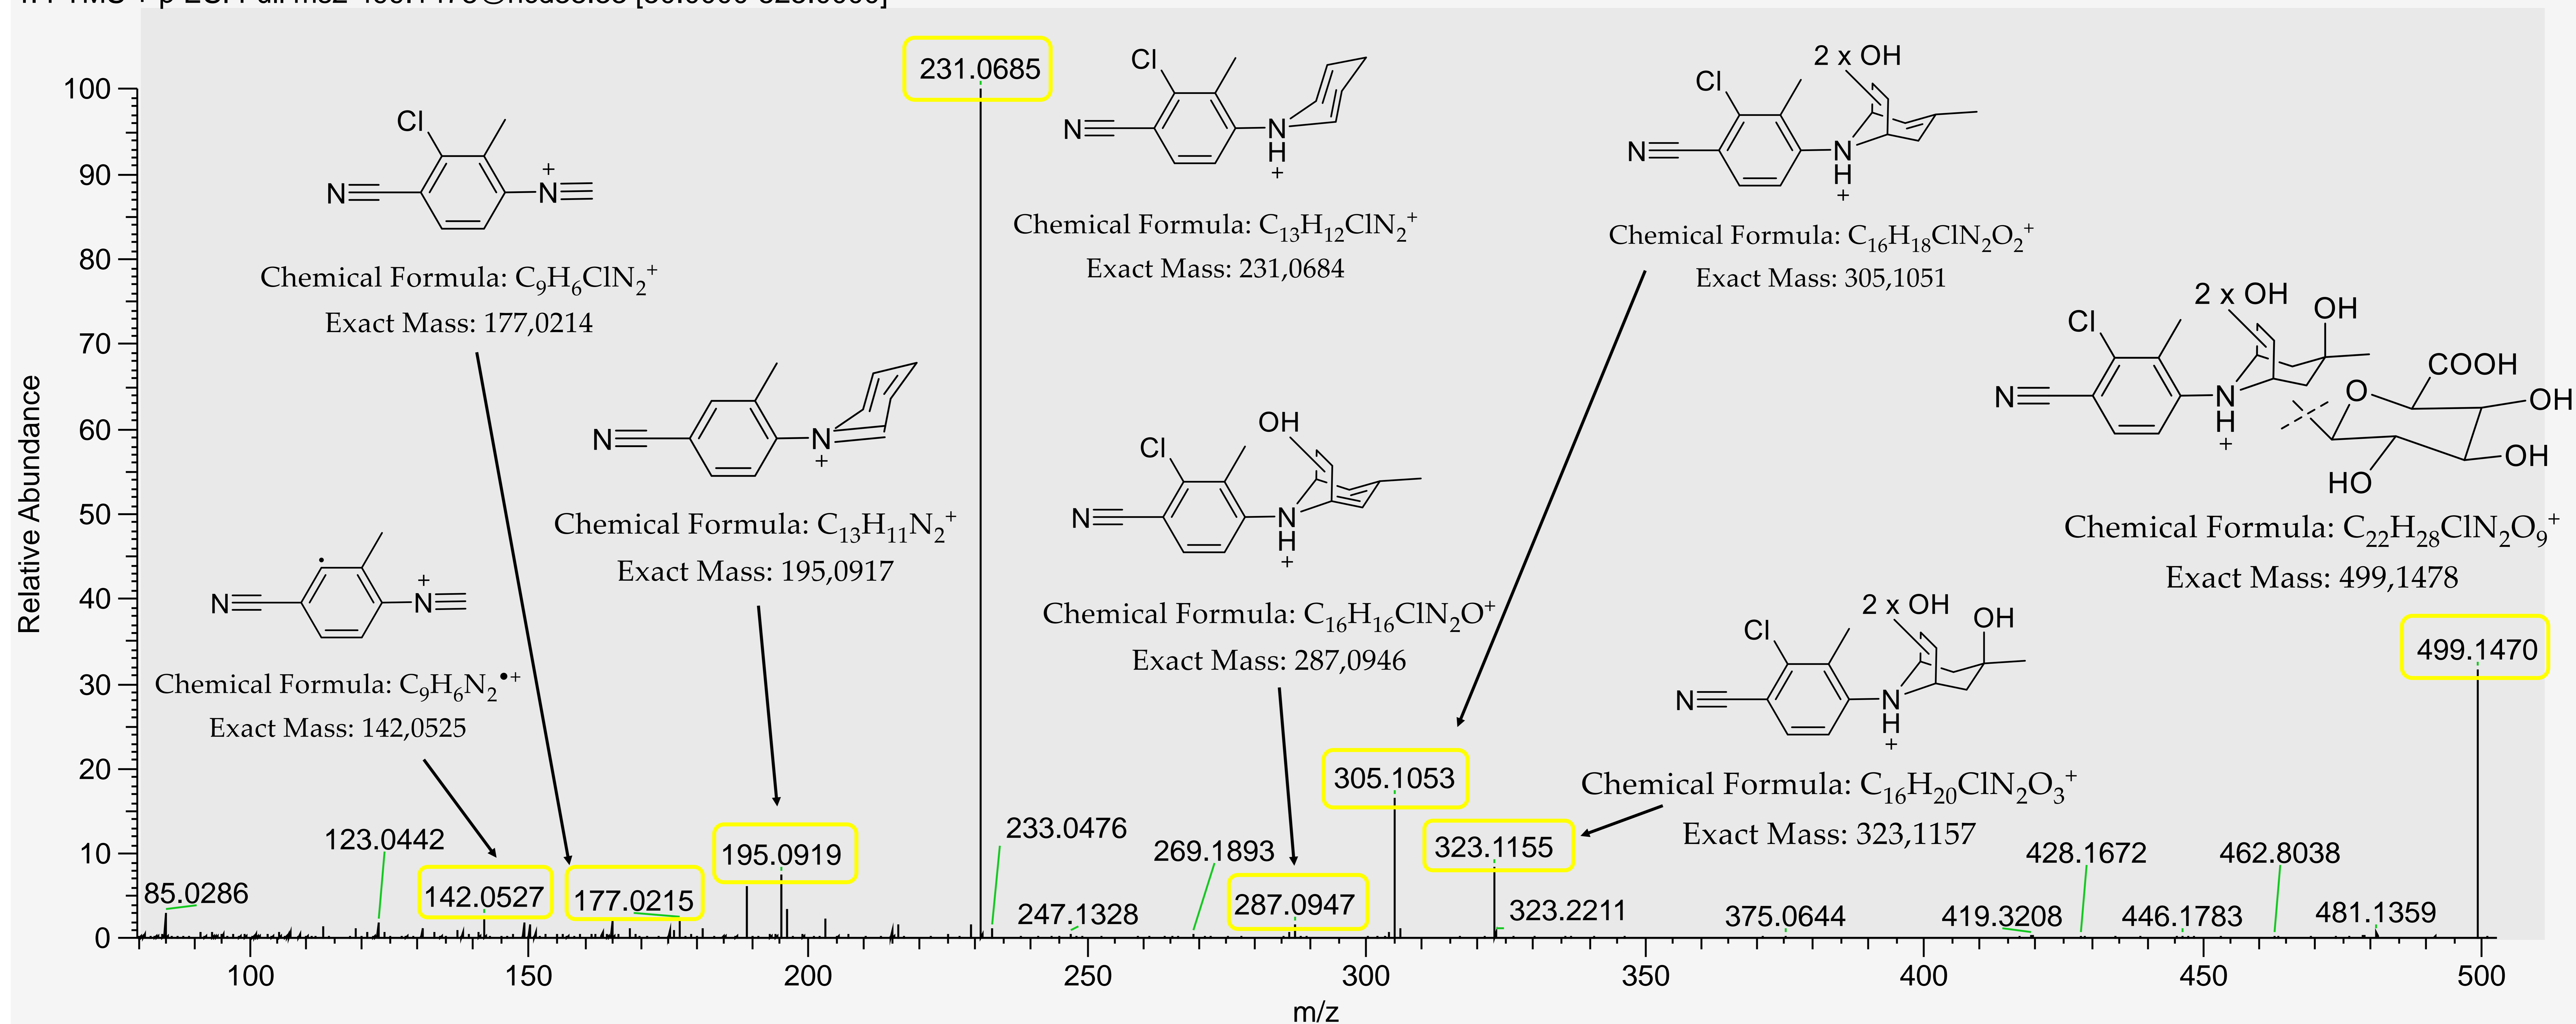



# M9b

Dihydroxylation + glucuronidation

Retention time: 6.52 min

m/z: 499.1478

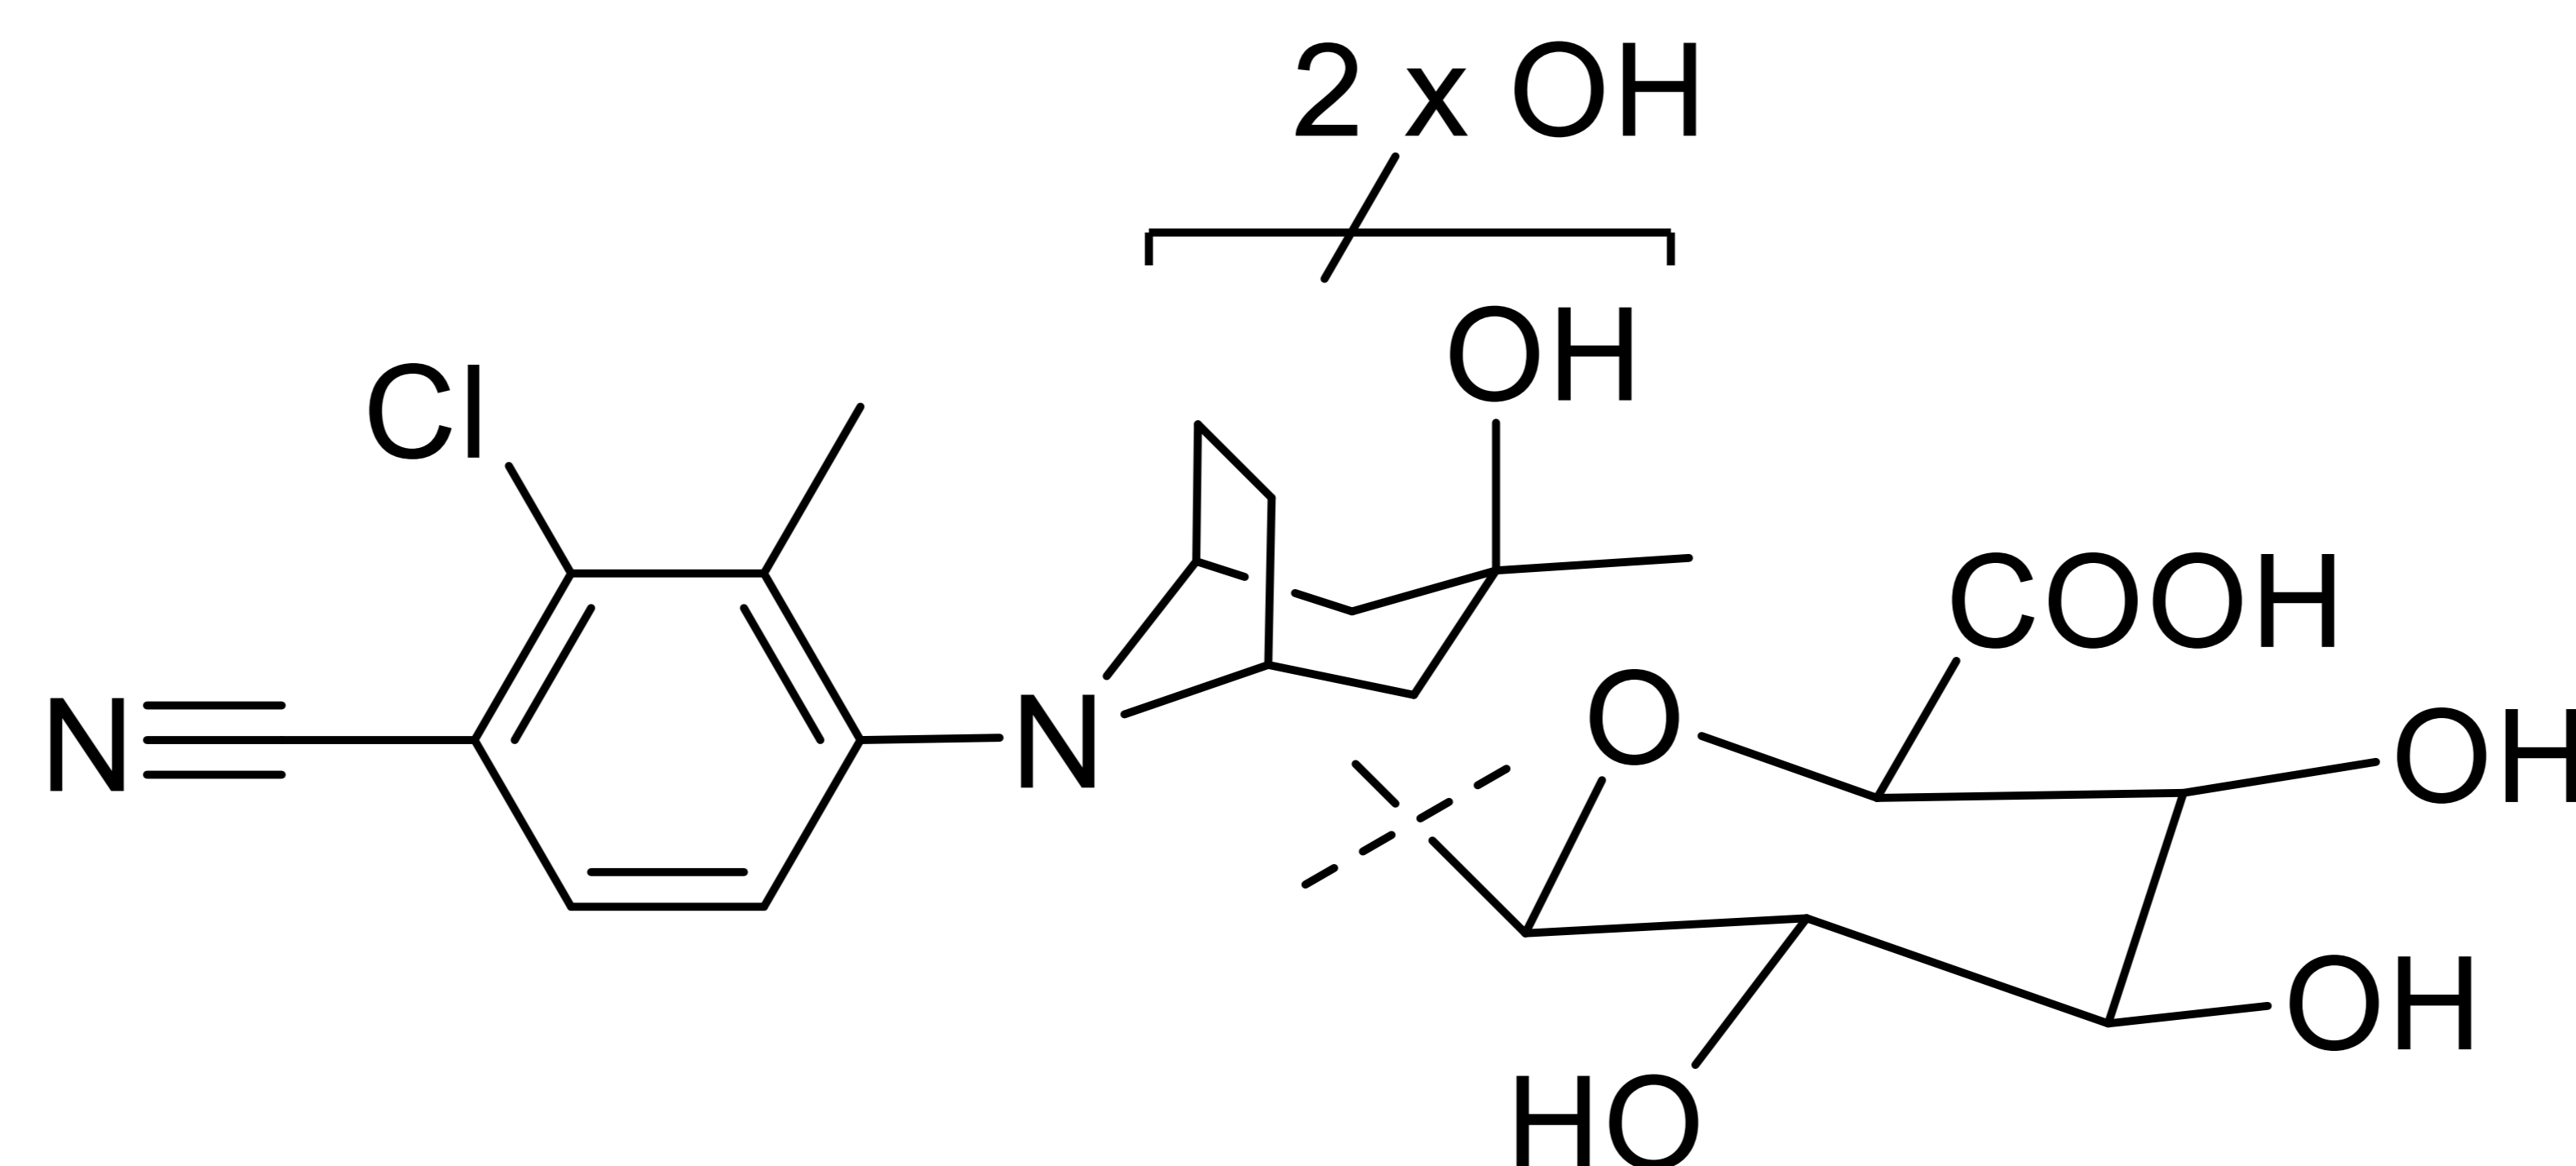

MNB\_20200429\_05 #1316 RT: 6.51 AV: 1 NL: 1.21E+006  
T: FTMS + p ESI Full ms2 499.1478@hcd38.33 [50.0000-525.0000]

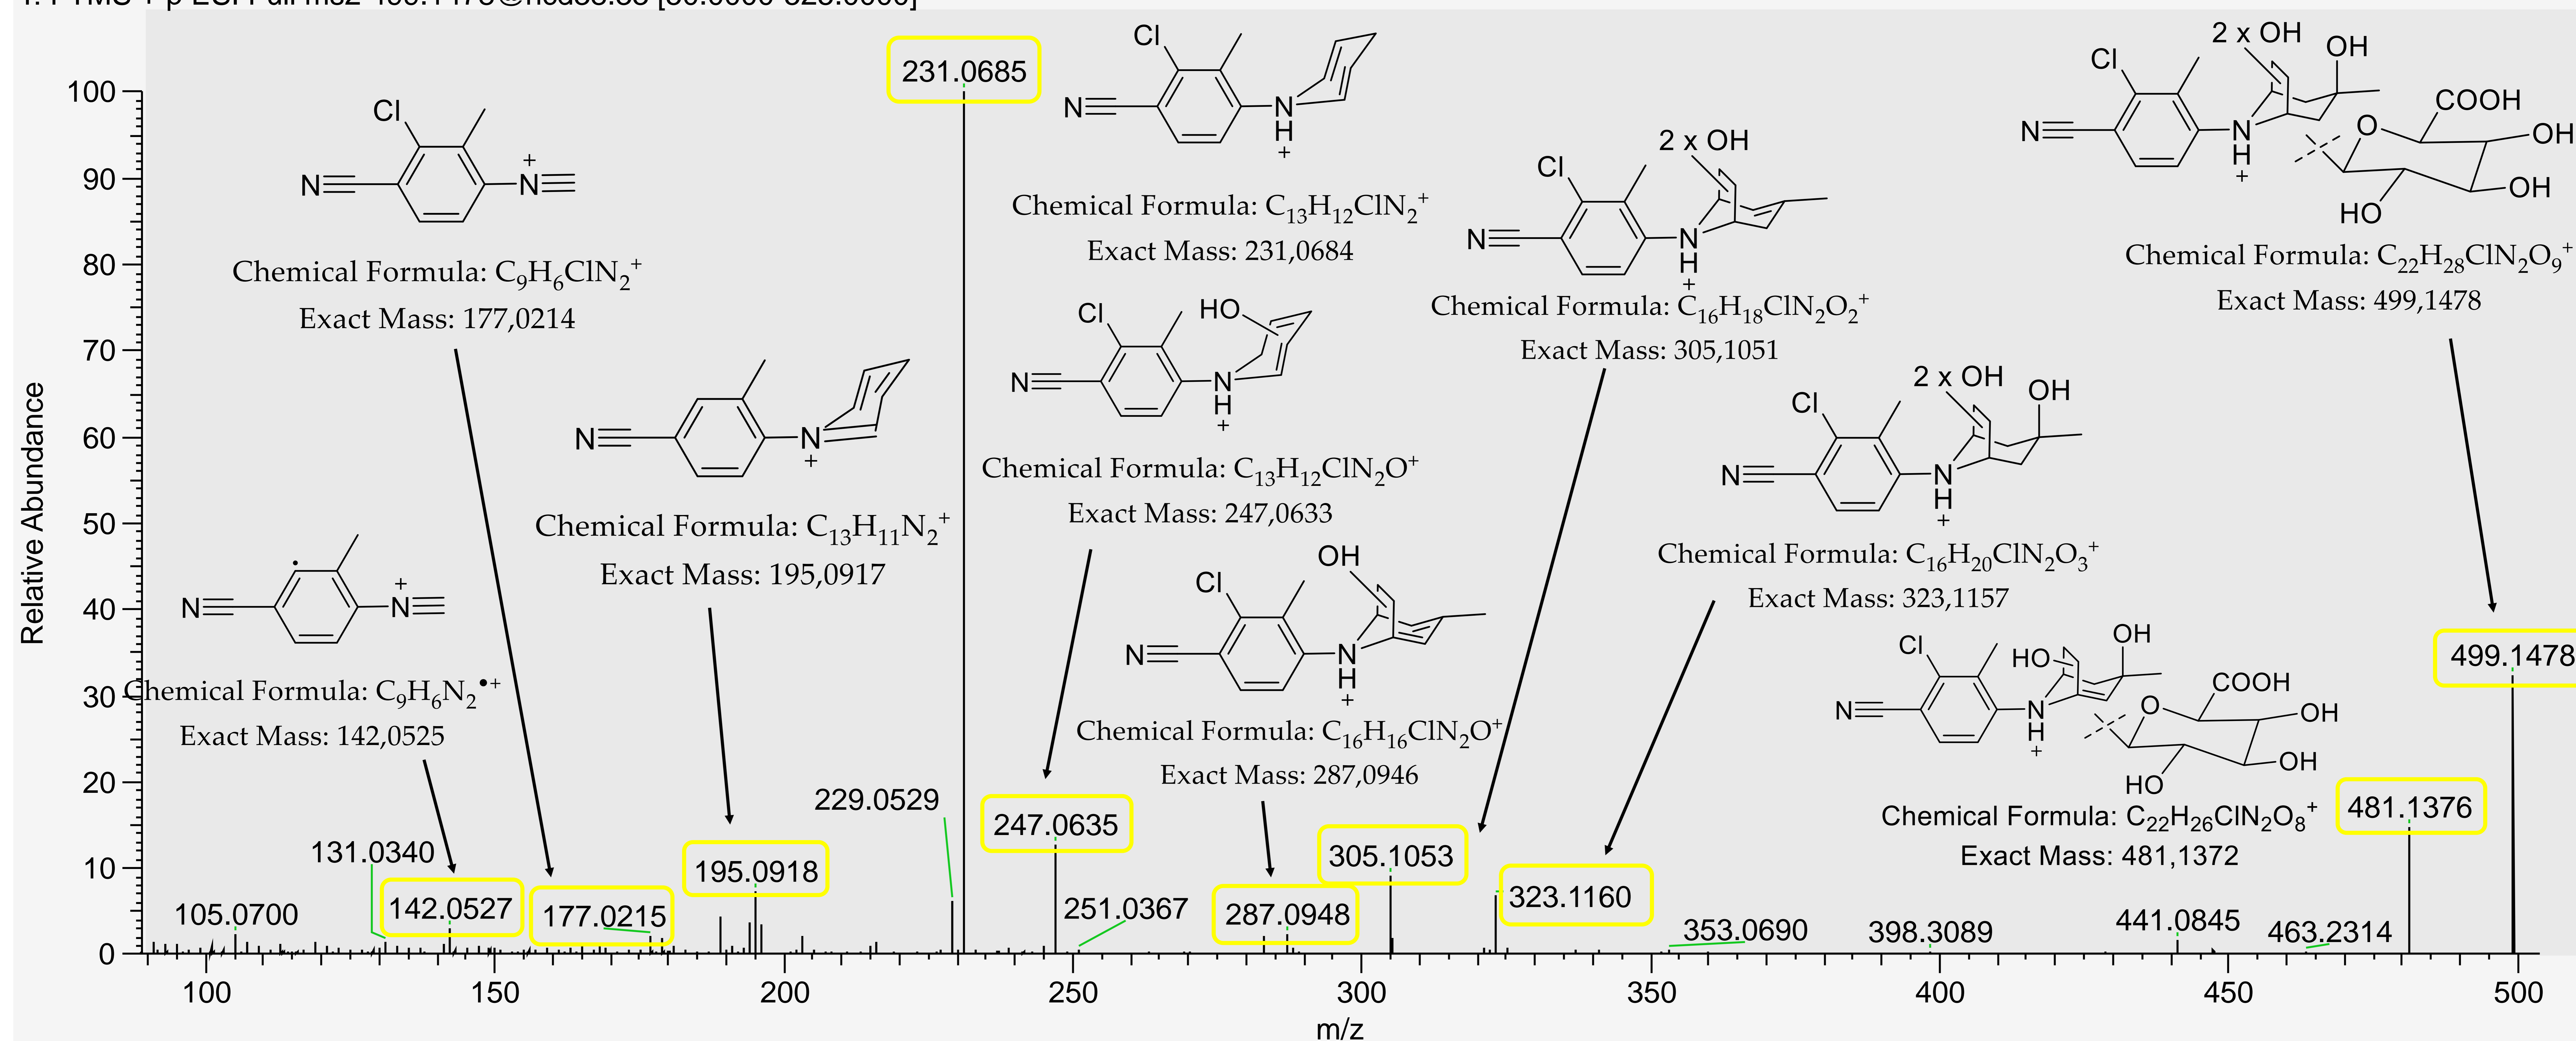

Supplement: metabolites-11-00085-s001.pdf [file metabolites-11-00085-s001.pdf]
